# Supplementary material for: Changes in DNA methylation associated with a specific mode of delivery: a pilot study
Source: Front Med (Lausanne). 2024 Jan 18;11:1291429. doi: 10.3389/fmed.2024.1291429 (PMC10835804; doi:10.3389/fmed.2024.1291429)
Supplement: Supplementary file 1 [file Table_1.XLSX]

## Sheet: DifferentialMethylation_B.sorte
ID	chr	start	end	strand	pvalue	qvalue	meth.diff
2866	chr5	34503352	34503352	+	1.66533453693773e-15	1.79221021096898e-12	-45.6015037593985
2917	chr5	125762736	125762736	+	4.44089209850063e-16	5.12208073958707e-13	-44.3927304964539
913	chr12	123718879	123718879	+	1.34492417203091e-12	9.3279227295171e-10	-44.1143180531975
2698	chr4	10089763	10089763	+	9.10382880192628e-15	8.79470901765646e-12	-44.0100882723833
1714	chr18	71404351	71404351	+	8.122602590532319e-11	4.18892456834626e-08	-44.0033783783784
2581	chr3	158962641	158962641	+	5.6621374255883e-15	5.62589694951572e-12	-43.8171584513048
770	chr11	125060910	125060910	+	9.43689570931383e-15	9.09245226447361e-12	-43.2860100561964
500	chr10	117735418	117735418	+	6.2172489379008806e-15	6.15030641340952e-12	-43.2543231961837
225	chr1	176660247	176660247	+	6.66133814775094e-16	7.50561349807416e-13	-43.2298136645963
2770	chr4	184544641	184544641	+	4.44089209850063e-16	5.12208073958707e-13	-42.5
3069	chr6	32452361	32452361	+	1.11022302462516e-16	1.37132955216678e-13	-42.3074530297375
3038	chr6	25882724	25882724	+	8.881784197001249e-16	9.88191546489155e-13	-42.0812182741117
3770	chr9	112809494	112809494	+	6.56918963670705e-13	4.78765575059644e-10	-41.991341991342
2836	chr5	6733663	6733663	+	6.36934949227452e-13	4.66174974762625e-10	-41.861555594631
2524	chr3	53230324	53230324	+	1.66533453693773e-15	1.79221021096898e-12	-41.7920257046882
3835	chrX	43512301	43512301	+	3.09752223870419e-14	2.7650446578224098e-11	-41.7133520074697
3673	chr8	135039273	135039273	+	6.66133814775094e-16	7.50561349807416e-13	-41.6221033868093
947	chr12	132104837	132104837	+	1.04360964314765e-14	1.00090426959623e-11	-41.3695529145444
1166	chr14	100484508	100484508	+	2.15050199869893e-13	1.69067506622621e-10	-40.9735892388451
2918	chr5	128206594	128206594	+	3.17523785042795e-14	2.8283786812717398e-11	-40.9662921348315
496	chr10	112193472	112193472	+	2.69784194983913e-13	2.09231160696314e-10	-40.9087041606398
3285	chr7	915094	915094	+	2.27595720048157e-14	2.07988551018749e-11	-40.7843137254902
1975	chr2	50190352	50190352	+	1.11022302462516e-15	1.21901677639141e-12	-40.7647907647908
983	chr13	33092929	33092929	+	4.08562073062058e-14	3.5740332823395494e-11	-40.6410256410256
2325	chr21	47574798	47574798	+	1.88737914186277e-15	2.01634008960981e-12	-40.0501833622853
3186	chr6	166737979	166737979	+	2.2204460492503099e-16	2.6476607245991e-13	-39.9673284744911
3813	chr9	137016821	137016821	+	3.33066907387547e-16	3.90153688040404e-13	-39.6132075471698
420	chr10	28126080	28126080	+	3.4416913763379904e-15	3.52622797554538e-12	-39.3324370443146
1676	chr18	7734917	7734917	+	1.0920153670213e-12	7.65732413576357e-10	-39.1779520076028
1598	chr17	66427519	66427519	+	2.66453525910038e-15	2.7835884690465697e-12	-38.7750653879686
2451	chr22	49018872	49018872	+	1.77635683940025e-15	1.90398810788753e-12	-38.7346149933883
773	chr11	125791017	125791017	+	1.0769163338864e-13	8.814599490379319e-11	-38.5704896483733
257	chr1	205713138	205713138	+	6.938893903907231e-14	5.87167385244921e-11	-38.3042245111211
1248	chr15	70186171	70186171	+	4.81281681175005e-13	3.58986146797737e-10	-38.269037468372
658	chr11	10475953	10475953	+	3.2196467714129504e-15	3.30799549028827e-12	-38.1034482758621
2003	chr2	100214615	100214615	+	5.70143932066003e-12	3.5754971663149e-09	-38.0326855464977
835	chr12	11338669	11338669	+	3.66677244123537e-10	1.67727500062194e-07	-38.0244755244755
236	chr1	182031832	182031832	+	6.30606677987089e-14	5.3703436401606494e-11	-37.9192546583851
401	chr10	11761898	11761898	+	4.31987778881648e-12	2.7557472744805604e-09	-37.8056551174831
2705	chr4	14165435	14165435	+	1.11022302462516e-16	1.37132955216678e-13	-37.7829709408657
395	chr10	6178388	6178388	+	1.4432899320127001e-15	1.56766281433112e-12	-37.7155963302752
1114	chr14	31727546	31727546	+	2.2204460492503103e-15	2.3481602523188297e-12	-37.480252764613
1603	chr17	71582553	71582553	+	2.24265050974282e-14	2.0500884137294197e-11	-37.1416345742405
2537	chr3	78955271	78955271	+	9.973244452510239e-12	5.985072742958241e-09	-37.0707273091565
1907	chr2	3045851	3045851	+	3.33066907387547e-16	3.90153688040404e-13	-37.0393981894683
2431	chr22	45580898	45580898	+	2.1216362000586697e-12	1.4226001200865702e-09	-36.9540692989525
3602	chr8	18420055	18420055	+	5.04041253179821e-14	4.3468923899903493e-11	-36.9046435318683
924	chr12	125261796	125261796	+	1.11022302462516e-16	1.37132955216678e-13	-36.7349048800662
3102	chr6	34123390	34123390	+	4.67403893367191e-14	4.0440394959313596e-11	-36.7036743325403
3460	chr7	101348608	101348608	+	1.11022302462516e-16	1.37132955216678e-13	-36.6192816970019
1953	chr2	33931616	33931616	+	1.3101741913601499e-12	9.097690851184061e-10	-36.5795313715883
2129	chr2	240609976	240609976	+	8.881784197001249e-16	9.88191546489155e-13	-36.4917835067089
3841	chrX	119151690	119151690	+	1.33226762955019e-15	1.4530062060751799e-12	-36.4671067607557
3345	chr7	2477366	2477366	+	3.6637359812630205e-15	3.7432412849071996e-12	-36.4480383348308
893	chr12	116382646	116382646	+	3.33726379864174e-11	1.84355980455376e-08	-36.4176829268293
433	chr10	31054185	31054185	+	5.86197757002083e-14	5.0096462803617895e-11	-36.4023313743984
1127	chr14	55840851	55840851	+	1.30727650926588e-11	7.709165398323781e-09	-36.3495453292918
1019	chr13	109352750	109352750	+	1.774136393351e-13	1.40917214308219e-10	-36.3373206760036
3177	chr6	158799140	158799140	+	2.01061389759616e-13	1.58538371143883e-10	-36.3330438558402
1973	chr2	47795271	47795271	+	5.30373153173613e-08	1.51631821343763e-05	-36.3276836158192
3750	chr9	90751269	90751269	+	2.2204460492503099e-16	2.6476607245991e-13	-36.2799884381925
2672	chr4	5925185	5925185	+	1.11022302462516e-16	1.37132955216678e-13	-36.2554112554113
3317	chr7	1157435	1157435	+	1.11022302462516e-16	1.37132955216678e-13	-36.1922833649589
3208	chr6	169241431	169241431	+	1.65195581658395e-08	5.3489779946486e-06	-36.0931899641577
2157	chr2	242682555	242682555	+	2.94875235340442e-13	2.2688649243557002e-10	-36.092353205994
473	chr10	81371698	81371698	+	9.992007221626409e-16	1.1004184185829099e-12	-36.0687881710061
3192	chr6	167402149	167402149	+	9.649414600687579e-11	4.91225466199009e-08	-35.9687969772072
633	chr11	2262146	2262146	+	2.0095036745715302e-14	1.8496729391130598e-11	-35.9622379680831
792	chr11	134721864	134721864	+	2.70894418008538e-14	2.4442733549684697e-11	-35.9394736163741
2725	chr4	48250356	48250356	+	1.11022302462516e-16	1.37132955216678e-13	-35.9271219404792
3056	chr6	31238372	31238372	+	1.34893868297681e-08	4.47223845793941e-06	-35.916179337232
3754	chr9	94182362	94182362	+	2.78732592562392e-12	1.8325735820188402e-09	-35.8707557502738
1703	chr18	46501069	46501069	+	1.61759494687885e-13	1.29219938196398e-10	-35.8489243921239
3741	chr9	37727736	37727736	+	9.82855574704899e-10	4.14472540585972e-07	-35.8330668372242
2132	chr2	240835252	240835252	+	1.2669976179324699e-11	7.48521253947653e-09	-35.807623120524
2937	chr5	138299629	138299629	+	4.773959005888171e-15	4.797157537451e-12	-35.8
2681	chr4	7632330	7632330	+	3.33066907387547e-16	3.90153688040404e-13	-35.785973770088
724	chr11	69875694	69875694	+	7.2118977456625495e-12	4.4306316443907e-09	-35.744928984964
1863	chr19	54655647	54655647	+	1.5000889419525297e-11	8.76144925294355e-09	-35.711162681196
3836	chrX	53004591	53004591	+	1.11022302462516e-16	1.37132955216678e-13	-35.5855855855856
2956	chr5	159188366	159188366	+	2.8643754035329e-14	2.5757816992730197e-11	-35.5563952389949
1918	chr2	3775085	3775085	+	6.24855722719531e-12	3.88860466581487e-09	-35.5385717697635
3529	chr7	157885870	157885870	+	7.56728013584507e-13	5.449914077556091e-10	-35.5240401245244
2191	chr20	31367078	31367078	+	4.22994972382185e-14	3.6881614098947e-11	-35.4730438430879
1528	chr17	4712313	4712313	+	2.70018229997504e-10	1.268240756003e-07	-35.3445512820513
3402	chr7	43865233	43865233	+	2.2204460492503099e-16	2.6476607245991e-13	-35.3211009174312
556	chr10	134296241	134296241	+	9.10382880192628e-15	8.79470901765646e-12	-35.2286228967843
308	chr1	244557893	244557893	+	1.35195554751277e-09	5.55543527985508e-07	-35.1890297202797
2739	chr4	95896343	95896343	+	6.17339512842818e-12	3.8434645792248e-09	-35.1428571428571
850	chr12	31375960	31375960	+	1.0531797656199199e-11	6.3008843705385604e-09	-35.1198656283402
3129	chr6	88061024	88061024	+	2.2204460492503099e-16	2.6476607245991e-13	-35.115219721329
2840	chr5	6755460	6755460	+	3.88578058618805e-15	3.95904560647314e-12	-35.0682655493751
2906	chr5	107060400	107060400	+	8.29902813137551e-12	5.0549970219332e-09	-34.9107672964761
3067	chr6	32443819	32443819	+	1.5099033134902099e-13	1.21079868576405e-10	-34.8999393571862
3669	chr8	133930674	133930674	+	1.11022302462516e-16	1.37132955216678e-13	-34.8432055749129
3575	chr8	2066351	2066351	+	1.11022302462516e-16	1.37132955216678e-13	-34.8075903117449
1207	chr15	24819175	24819175	+	9.60598267596424e-12	5.78008460762897e-09	-34.7374847374847
3039	chr6	25882794	25882794	+	2.05940264841331e-10	9.90324105663952e-08	-34.7173352099461
1942	chr2	25014763	25014763	+	6.0422777892199495e-12	3.7658390732084906e-09	-34.7136086662153
3270	chr7	870021	870021	+	1.38830502649512e-10	6.88307270507621e-08	-34.703196347032
3761	chr9	99894394	99894394	+	2.0872192862952902e-14	1.9157835172761097e-11	-34.7020805666224
277	chr1	224139286	224139286	+	1.11022302462516e-14	1.05958242305385e-11	-34.6361436813698
2735	chr4	88707532	88707532	+	3.47499806707674e-14	3.07759306580814e-11	-34.622641509434
2962	chr5	167603887	167603887	+	2.2204460492503103e-15	2.3481602523188297e-12	-34.5734727572923
3149	chr6	130704268	130704268	+	6.39824859760552e-11	3.36066031661051e-08	-34.5581516773267
2047	chr2	134535406	134535406	+	1.7634782523145999e-12	1.2000471743971102e-09	-34.4847314596296
700	chr11	62028465	62028465	+	4.9626969200744504e-14	4.2811315741749595e-11	-34.4046221901237
244	chr1	201236676	201236676	+	7.51732009973693e-13	5.41659943614914e-10	-34.3630997715156
1558	chr17	30822490	30822490	+	6.661338147750941e-15	6.5585727639631896e-12	-34.3295019157088
1612	chr17	74011451	74011451	+	6.48370246381091e-14	5.5103948594380795e-11	-34.3036830609324
1529	chr17	7998808	7998808	+	3.86801701779405e-13	2.93070950451722e-10	-34.2850974253792
165	chr1	108656210	108656210	+	8.54871728961371e-15	8.28305753640393e-12	-34.2811222667566
351	chr10	1247742	1247742	+	1.01130215313106e-12	7.140980567094101e-10	-34.2692767863962
3581	chr8	3892688	3892688	+	2.8281821329301197e-12	1.8576176635057901e-09	-34.2640606302353
1126	chr14	55749606	55749606	+	4.0634162701280704e-14	3.55780004046802e-11	-34.262962962963
260	chr1	207135263	207135263	+	2.5497715050448697e-11	1.43840664744005e-08	-34.2523378627849
3505	chr7	151542840	151542840	+	1.47659662275146e-14	1.3870767297208698e-11	-34.2205614640222
1914	chr2	3404844	3404844	+	1.00985886319904e-12	7.13423240797196e-10	-34.2120042120042
2763	chr4	163906169	163906169	+	5.68545210910543e-13	4.19477780892954e-10	-34.1118379932497
1351	chr16	28014560	28014560	+	1.88737914186277e-15	2.01634008960981e-12	-34.1103341103341
1391	chr16	78082862	78082862	+	1.17683640610267e-14	1.1205989234064699e-11	-33.9951671365284
849	chr12	31209253	31209253	+	1.06858966120171e-12	7.51105986065934e-10	-33.957242582897
28	chr1	3589879	3589879	+	8.881784197001249e-16	9.88191546489155e-13	-33.9374555792466
2957	chr5	159735468	159735468	+	1.39804168242108e-10	6.92782460894943e-08	-33.927091963546
3008	chr6	7388469	7388469	+	1.11022302462516e-16	1.37132955216678e-13	-33.8798593289611
3615	chr8	27767170	27767170	+	1.11022302462516e-16	1.37132955216678e-13	-33.8711830023489
1949	chr2	29438655	29438655	+	8.48987546930857e-13	6.06806393145053e-10	-33.8070915685839
2817	chr5	1742623	1742623	+	3.1812969147893e-08	9.61271551266375e-06	-33.7607531244928
3790	chr9	133030751	133030751	+	3.33066907387547e-16	3.90153688040404e-13	-33.7024093031887
2090	chr2	218999254	218999254	+	8.120713324011321e-09	2.83324546590387e-06	-33.6267605633803
1520	chr17	2859307	2859307	+	1.04206489215386e-07	2.75326298200908e-05	-33.6029460117051
719	chr11	69580592	69580592	+	1.8082202402069898e-12	1.22763912811685e-09	-33.5714285714286
1473	chr16	88853729	88853729	+	7.19514448022096e-11	3.74494413828225e-08	-33.5456475583864
1692	chr18	20816684	20816684	+	1.22124532708767e-15	1.3369052300753499e-12	-33.5424133811231
269	chr1	213779195	213779195	+	4.46653825036947e-12	2.84310709976337e-09	-33.5380962213504
132	chr1	52991638	52991638	+	1.98385752270269e-12	1.33664880777356e-09	-33.5348360655738
2407	chr22	37979264	37979264	+	1.11022302462516e-16	1.37132955216678e-13	-33.523090019153
1648	chr17	80040638	80040638	+	1.70072844696278e-11	9.8429340837623e-09	-33.5087719298246
737	chr11	72700779	72700779	+	3.33066907387547e-16	3.90153688040404e-13	-33.4591084591085
1950	chr2	29446201	29446201	+	4.01027988594649e-10	1.8224386823556e-07	-33.4505541346974
1822	chr19	36268470	36268470	+	5.36892752478479e-12	3.37928376105721e-09	-33.3986562150056
2422	chr22	43157308	43157308	+	3.69362267438333e-08	1.09838374017785e-05	-33.3872901678657
2988	chr5	180466563	180466563	+	1.0991207943789e-14	1.0500140097917899e-11	-33.3561175666439
2286	chr21	43869658	43869658	+	6.228351168147131e-14	5.3103418321550596e-11	-33.3382016454895
295	chr1	234162957	234162957	+	4.44089209850063e-16	5.12208073958707e-13	-33.3235077376566
3046	chr6	29942706	29942706	+	3.33066907387547e-16	3.90153688040404e-13	-33.2809440379264
164	chr1	108656156	108656156	+	3.33066907387547e-16	3.90153688040404e-13	-33.2134329746659
3851	chrX	153061555	153061555	+	2.8643754035329e-14	2.5757816992730197e-11	-33.2010479482847
490	chr10	104592124	104592124	+	4.773959005888171e-15	4.797157537451e-12	-33.1539074960128
2009	chr2	102500335	102500335	+	1.66533453693773e-15	1.79221021096898e-12	-33.1240110759494
1412	chr16	85298712	85298712	+	9.32587340685131e-15	8.99733252762876e-12	-33.1182523616734
2741	chr4	100243309	100243309	+	5.8715151629584706e-09	2.11016179031388e-06	-33.1044776119403
2130	chr2	240609979	240609979	+	2.49578135935735e-13	1.94540010282866e-10	-32.9874517374517
1951	chr2	30478197	30478197	+	1.11022302462516e-16	1.37132955216678e-13	-32.9841162554917
645	chr11	3743045	3743045	+	6.24601592669194e-10	2.74055824123668e-07	-32.9681570697905
116	chr1	39511057	39511057	+	4.69735361718904e-13	3.5091048887236603e-10	-32.956580816503
3210	chr6	169244426	169244426	+	3.99680288865056e-15	4.06226014334809e-12	-32.9407983168722
307	chr1	244256545	244256545	+	2.28705943072782e-14	2.0893787701252498e-11	-32.9040444554643
1171	chr14	100828487	100828487	+	2.1094237467878e-15	2.2396558226625098e-12	-32.8738418036305
2214	chr20	47184280	47184280	+	7.05203007100863e-10	3.06252621532261e-07	-32.8414782726411
501	chr10	118404699	118404699	+	6.661338147750941e-15	6.5585727639631896e-12	-32.8319783197832
3319	chr7	1198855	1198855	+	1.11022302462516e-16	1.37132955216678e-13	-32.8317110655738
1509	chr17	953456	953456	+	3.18411963462495e-13	2.4358727857909403e-10	-32.8057193724268
2370	chr22	22757847	22757847	+	3.10862446895044e-14	2.7724179169255297e-11	-32.7774583093732
2428	chr22	44597747	44597747	+	4.44089209850063e-16	5.12208073958707e-13	-32.7621419676214
1570	chr17	37152797	37152797	+	4.6163073363914e-13	3.45561786399783e-10	-32.746833246573
542	chr10	132882778	132882778	+	2.77555756156289e-15	2.8861760030944397e-12	-32.7438193139531
3007	chr6	5951137	5951137	+	6.24410745331261e-10	2.74013173821048e-07	-32.732665925102
2579	chr3	156881588	156881588	+	1.4210854715202e-14	1.33750724593965e-11	-32.7311275680841
125	chr1	44086831	44086831	+	4.45199432874688e-14	3.8644929200306196e-11	-32.6650456484837
1887	chr2	903583	903583	+	9.992007221626409e-16	1.1004184185829099e-12	-32.5544968019841
2585	chr3	169122836	169122836	+	3.2868596733237597e-11	1.81846213384929e-08	-32.5352112676056
3665	chr8	128344409	128344409	+	3.4909852786313396e-11	1.92375677537493e-08	-32.5087830444048
251	chr1	204416013	204416013	+	8.97060203897126e-14	7.44661902110395e-11	-32.5039287585123
1707	chr18	56028859	56028859	+	1.11022302462516e-16	1.37132955216678e-13	-32.466266076323
1626	chr17	77126811	77126811	+	2.34257058195908e-14	2.13609042884554e-11	-32.4380471880101
3509	chr7	154685611	154685611	+	4.3298697960381105e-15	4.37948526284967e-12	-32.4332200097135
311	chr1	245581534	245581534	+	5.28466159721575e-14	4.5401395816898296e-11	-32.4105209164482
1458	chr16	88442744	88442744	+	2.55351295663786e-15	2.67333213985371e-12	-32.3913457872665
454	chr10	66813928	66813928	+	2.9976021664879203e-15	3.0928897089296098e-12	-32.3860485749141
2909	chr5	109180462	109180462	+	1.0313678799889201e-09	4.32989624762393e-07	-32.3809523809524
1637	chr17	78407991	78407991	+	3.17756975176664e-08	9.6024449678321e-06	-32.3774954627949
2101	chr2	232823235	232823235	+	2.44249065417534e-15	2.56260141985759e-12	-32.3395701252513
1165	chr14	100434760	100434760	+	1.31079014309421e-08	4.35653793290893e-06	-32.3067253299811
41	chr1	7792411	7792411	+	9.992007221626409e-16	1.1004184185829099e-12	-32.2054297003973
247	chr1	201970747	201970747	+	2.2204460492503099e-16	2.6476607245991e-13	-32.2025435427497
703	chr11	63591860	63591860	+	9.43689570931383e-15	9.09245226447361e-12	-32.1569734613213
1411	chr16	85219126	85219126	+	8.941292151121159e-12	5.414645468764831e-09	-32.1512527951379
2435	chr22	46326619	46326619	+	2.77800005221707e-12	1.8279393676788202e-09	-32.1469469173654
3839	chrX	93432000	93432000	+	9.1743512786735e-10	3.89969973827456e-07	-32.1212121212121
1927	chr2	11118409	11118409	+	2.0948720536040402e-10	1.00572781005922e-07	-32.1027287319422
259	chr1	207105641	207105641	+	7.74935671188359e-14	6.51041756227391e-11	-32.0837554880108
58	chr1	12044164	12044164	+	3.3306690738754704e-15	3.4148700515940098e-12	-32.0595708639187
2898	chr5	78066301	78066301	+	1.33226762955019e-15	1.4530062060751799e-12	-32.0060483870968
3482	chr7	135480428	135480428	+	2.43716158365714e-12	1.6207958403134602e-09	-32.0023148148148
1571	chr17	37268414	37268414	+	1.79302128699987e-11	1.03443419104225e-08	-31.9902578493143
3667	chr8	129076573	129076573	+	1.42227785104865e-10	7.0363678791614e-08	-31.9807213930348
585	chr10	134811534	134811534	+	1.11022302462516e-16	1.37132955216678e-13	-31.9456786307615
1013	chr13	79234170	79234170	+	1.05684683227025e-10	5.342938726174e-08	-31.9355527102006
3480	chr7	134036270	134036270	+	2.69784194983913e-14	2.4357580046504e-11	-31.9091513037701
3127	chr6	85400070	85400070	+	2.9976021664879203e-15	3.0928897089296098e-12	-31.9088319088319
2860	chr5	28157278	28157278	+	3.59785551351521e-08	1.07284896294091e-05	-31.9079345850999
477	chr10	84713797	84713797	+	4.11960754398422e-09	1.53015890605332e-06	-31.871921182266
3350	chr7	2613543	2613543	+	4.45199432874688e-14	3.8644929200306196e-11	-31.8300257536737
3259	chr7	794576	794576	+	6.47704112566316e-13	4.72756234043173e-10	-31.82607879044
2230	chr20	59601928	59601928	+	7.105427357601e-15	6.9746897477798794e-12	-31.777885235332
1601	chr17	71410891	71410891	+	4.2830849977804096e-11	2.32005766428792e-08	-31.7690712648696
1191	chr14	105412066	105412066	+	1.01204238323049e-08	3.45230633214389e-06	-31.7471301799235
2899	chr5	80594345	80594345	+	5.63084245897016e-09	2.03140090404194e-06	-31.7241379310345
1974	chr2	48795413	48795413	+	2.0872192862952902e-14	1.9157835172761097e-11	-31.6808345244364
2416	chr22	42522391	42522391	+	1.11022302462516e-16	1.37132955216678e-13	-31.6758043265757
964	chr13	19581774	19581774	+	6.010747455320599e-12	3.750981434202581e-09	-31.6727884909703
3212	chr6	169271072	169271072	+	1.81828330170219e-10	8.82057472656958e-08	-31.6713551265884
2737	chr4	89679537	89679537	+	1.73749903353837e-12	1.18374476011992e-09	-31.6326530612245
1816	chr19	33907058	33907058	+	6.66133814775094e-16	7.50561349807416e-13	-31.6289860346632
1948	chr2	28833750	28833750	+	4.00062682981428e-09	1.49031653471943e-06	-31.5960510078157
974	chr13	26441025	26441025	+	8.7568063911192e-11	4.49066487869143e-08	-31.5810315810316
1026	chr13	111331179	111331179	+	6.5503158452884204e-15	6.4579549473013095e-12	-31.5790754257908
3178	chr6	160771765	160771765	+	4.44089209850063e-16	5.12208073958707e-13	-31.5713498831887
2738	chr4	89679539	89679539	+	4.27269331026991e-12	2.7286215321707304e-09	-31.5505568901507
3824	chr9	139912177	139912177	+	1.11022302462516e-16	1.37132955216678e-13	-31.5442480161121
1694	chr18	24446525	24446525	+	8.881784197001249e-16	9.88191546489155e-13	-31.5323766052917
2380	chr22	24013287	24013287	+	6.90256740654149e-11	3.60548935767372e-08	-31.5315315315315
1152	chr14	94247413	94247413	+	1.3431866729973801e-10	6.67521470081276e-08	-31.5312738367658
245	chr1	201654961	201654961	+	5.26245713672324e-14	4.5223911368733894e-11	-31.5236523652365
1215	chr15	41100386	41100386	+	1.11022302462516e-16	1.37132955216678e-13	-31.4945511157239
3663	chr8	126632478	126632478	+	5.3033577529504295e-11	2.82718585927063e-08	-31.4665554937928
1159	chr14	99814364	99814364	+	5.2180482157382405e-15	5.2076380056925494e-12	-31.4536043640219
3276	chr7	887628	887628	+	4.773959005888171e-15	4.797157537451e-12	-31.4391927774827
1803	chr19	15082411	15082411	+	2.15483297871799e-10	1.03096234402209e-07	-31.4296688037345
3159	chr6	138745298	138745298	+	3.77351072611276e-09	1.41471626771216e-06	-31.4103343465046
1555	chr17	21805733	21805733	+	8.770761894538741e-15	8.486960880210479e-12	-31.3902796961326
3692	chr8	143182514	143182514	+	1.11022302462516e-16	1.37132955216678e-13	-31.3753269398431
3483	chr7	137013465	137013465	+	3.33066907387547e-16	3.90153688040404e-13	-31.371996996997
3162	chr6	139013142	139013142	+	1.66533453693773e-15	1.79221021096898e-12	-31.3691141381498
3759	chr9	97040913	97040913	+	9.54680778875172e-13	6.764018600098201e-10	-31.3557459898923
189	chr1	146515238	146515238	+	7.034672844241639e-11	3.66925343676862e-08	-31.3182402055234
1250	chr15	70613419	70613419	+	7.17204073907851e-14	6.06019951506694e-11	-31.3022138680033
3407	chr7	46643538	46643538	+	1.3438139490062899e-12	9.3224322424708e-10	-31.285580231467
3128	chr6	87183398	87183398	+	4.21395574812244e-06	0.0006461937381244	-31.2466124661247
2107	chr2	236771052	236771052	+	8.82183215367149e-13	6.280780770893991e-10	-31.2433862433862
3739	chr9	36967063	36967063	+	5.8841820305133305e-15	5.834633161009969e-12	-31.224162553554
2329	chr21	47581949	47581949	+	2.2204460492503099e-16	2.6476607245991e-13	-31.2091954022989
1441	chr16	88030100	88030100	+	1.11022302462516e-16	1.37132955216678e-13	-31.1662631154157
3385	chr7	27533291	27533291	+	1.11022302462516e-16	1.37132955216678e-13	-31.1457054594019
2048	chr2	134586343	134586343	+	9.992007221626409e-16	1.1004184185829099e-12	-31.1436086843934
2931	chr5	136966527	136966527	+	6.66133814775094e-16	7.50561349807416e-13	-31.0769656699889
1393	chr16	78597746	78597746	+	3.33066907387547e-16	3.90153688040404e-13	-31.0712262815067
1708	chr18	56279985	56279985	+	2.55351295663786e-15	2.67333213985371e-12	-31.0643420594105
3486	chr7	139688003	139688003	+	1.7698620347061897e-11	1.02167740347895e-08	-31.0290448148518
2833	chr5	6707981	6707981	+	3.33066907387547e-16	3.90153688040404e-13	-31.0
3620	chr8	30390284	30390284	+	7.38969996305627e-10	3.19258446443859e-07	-30.9974747474747
2000	chr2	99801307	99801307	+	3.80140363631654e-13	2.88322429339049e-10	-30.9703863751906
347	chr10	1229008	1229008	+	2.2204460492503099e-16	2.6476607245991e-13	-30.9554625047583
3752	chr9	93658205	93658205	+	2.2204460492503099e-16	2.6476607245991e-13	-30.9507696604471
2897	chr5	78065875	78065875	+	2.69784194983913e-14	2.4357580046504e-11	-30.9487832931147
1913	chr2	3403317	3403317	+	7.771561172376101e-16	8.70959707528981e-13	-30.9470304975923
1089	chr13	114751039	114751039	+	2.3314683517128303e-15	2.45051271159285e-12	-30.9413281753707
659	chr11	11260318	11260318	+	3.37937455796578e-11	1.86611789131662e-08	-30.940368869407
2835	chr5	6723949	6723949	+	1.81787918052123e-12	1.2339104977157702e-09	-30.9230101661294
1580	chr17	48605780	48605780	+	2.3709345597922e-10	1.12588631213453e-07	-30.8832709113608
1841	chr19	46877975	46877975	+	5.55111512312578e-16	6.337650622479709e-13	-30.8619258577757
1940	chr2	23516910	23516910	+	4.44089209850063e-15	4.48557778264839e-12	-30.7680491551459
887	chr12	108350189	108350189	+	1.47526435512191e-12	1.01716437262715e-09	-30.7606338615513
940	chr12	131971976	131971976	+	2.1206574052357e-08	6.69980870552006e-06	-30.737444373808
1582	chr17	48920101	48920101	+	3.4938052451138895e-11	1.92458586666076e-08	-30.7335156924849
3383	chr7	26591006	26591006	+	8.781864124784991e-14	7.312765082199009e-11	-30.7268547875713
2085	chr2	211495587	211495587	+	1.19015908239817e-13	9.68460691917987e-11	-30.7228621035385
1401	chr16	84059452	84059452	+	1.04465325279079e-11	6.256268287893271e-09	-30.7226914681598
1316	chr16	2746544	2746544	+	2.7448043837807697e-12	1.8073156716395502e-09	-30.6813735817257
436	chr10	34627212	34627212	+	4.2712722247984e-11	2.31537338836211e-08	-30.6772297469972
3095	chr6	33660142	33660142	+	1.05138120432002e-13	8.627312631805089e-11	-30.6664290805417
1040	chr13	112668262	112668262	+	3.61932706027801e-13	2.7522598366972203e-10	-30.6647333746269
3479	chr7	134002710	134002710	+	1.6342957431803e-08	5.29589743116399e-06	-30.646399508675
1124	chr14	52796940	52796940	+	7.39075467492967e-13	5.33328257049721e-10	-30.6309216192937
2479	chr3	11651895	11651895	+	4.4665926512976703e-10	2.01354529701401e-07	-30.5922311519326
3458	chr7	99518091	99518091	+	9.45576950073246e-13	6.70679926368634e-10	-30.5693069306931
457	chr10	71529190	71529190	+	4.1744385725905905e-14	3.6441037309524e-11	-30.5659203980099
3104	chr6	34123877	34123877	+	9.992007221626409e-16	1.1004184185829099e-12	-30.5562949161565
1853	chr19	49512857	49512857	+	1.31006316905768e-13	1.06042657170624e-10	-30.548141821762
2239	chr20	60500689	60500689	+	1.63202784619898e-14	1.52330436119686e-11	-30.5344652358462
3314	chr7	1140919	1140919	+	1.45855882927037e-10	7.20331259721021e-08	-30.529933481153
2837	chr5	6734326	6734326	+	2.2204460492503099e-16	2.6476607245991e-13	-30.5275150781194
3374	chr7	9766148	9766148	+	1.11022302462516e-16	1.37132955216678e-13	-30.5226327070987
2926	chr5	133909474	133909474	+	1.1819545342461898e-11	7.0054221289993106e-09	-30.4942810457516
3252	chr7	211662	211662	+	1.87516668859189e-13	1.48418177674908e-10	-30.4891826923077
1984	chr2	71190544	71190544	+	5.55111512312578e-16	6.337650622479709e-13	-30.4883815735834
2082	chr2	208976843	208976843	+	4.19483414670907e-09	1.55415500461941e-06	-30.4787000439174
36	chr1	5893669	5893669	+	1.765254609154e-14	1.64033049775869e-11	-30.4524020041261
972	chr13	25643054	25643054	+	2.476736534196e-06	0.0004160096412654	-30.4328718962865
765	chr11	120553181	120553181	+	2.09742512247146e-09	8.27942567453382e-07	-30.4306784660767
3121	chr6	52432018	52432018	+	8.80406858527749e-14	7.32708478186262e-11	-30.4166666666667
1797	chr19	9125628	9125628	+	6.52265574885291e-10	2.85338207165767e-07	-30.3937623738176
1524	chr17	3904445	3904445	+	5.96050951928717e-08	1.68190435689963e-05	-30.3777777777778
968	chr13	21527190	21527190	+	5.30686605770825e-14	4.5565402022937795e-11	-30.375240372122
610	chr11	1431525	1431525	+	1.08646425189818e-12	7.62388000793458e-10	-30.3747914260044
152	chr1	89489978	89489978	+	1.06056274873367e-10	5.35894710014818e-08	-30.3416149068323
2975	chr5	177847155	177847155	+	6.123990203832359e-13	4.493409547468e-10	-30.3204541292803
2436	chr22	46365501	46365501	+	1.66533453693773e-15	1.79221021096898e-12	-30.3038083012409
3107	chr6	36939363	36939363	+	8.11573031000989e-14	6.79286289284824e-11	-30.2874436031882
561	chr10	134617102	134617102	+	4.3366754631790595e-11	2.34734836700717e-08	-30.2529182879377
1063	chr13	113643382	113643382	+	7.93753951455756e-12	4.848942709830821e-09	-30.2418745275888
868	chr12	67850140	67850140	+	2.3553518508912e-06	0.0003987107545541	-30.2200455266607
1301	chr16	1101871	1101871	+	7.77267139540072e-13	5.58409198214848e-10	-30.2110429447853
2750	chr4	110866508	110866508	+	2.42774911285437e-10	1.15155769019381e-07	-30.1898694253454
1258	chr15	75979781	75979781	+	2.241080654386e-10	1.06838373724979e-07	-30.1226715129487
1566	chr17	30822595	30822595	+	3.33066907387547e-16	3.90153688040404e-13	-30.0925172082007
3240	chr6	170786370	170786370	+	3.33066907387547e-16	3.90153688040404e-13	-30.0577888813183
672	chr11	17250018	17250018	+	7.69141972334353e-10	3.3143957492828e-07	-30.0541220893644
524	chr10	129197344	129197344	+	6.66133814775094e-16	7.50561349807416e-13	-30.0528301886792
1478	chr16	89603698	89603698	+	4.3298697960381105e-15	4.37948526284967e-12	-30.0460278007917
2070	chr2	175654001	175654001	+	2.90878432451791e-14	2.6093012991409298e-11	-30.0448028673835
1105	chr14	21167148	21167148	+	6.66133814775094e-16	7.50561349807416e-13	-30.0327533652663
2268	chr21	28186673	28186673	+	3.12557757453646e-11	1.73415064933454e-08	-30.0201670988188
484	chr10	95798095	95798095	+	5.21238607831265e-12	3.2864094734269e-09	-29.9904577215502
1559	chr17	30822501	30822501	+	4.83058038014406e-13	3.60219302095325e-10	-29.9673952421205
2849	chr5	10635110	10635110	+	6.27276008913213e-13	4.5956535694340303e-10	-29.9520608876149
1870	chr19	56606583	56606583	+	2.3314683517128303e-15	2.45051271159285e-12	-29.9472901743479
1827	chr19	39523538	39523538	+	1.01696429055664e-13	8.366012407984589e-11	-29.9466295393897
1070	chr13	113745402	113745402	+	1.42141469705592e-08	4.68808993587387e-06	-29.9452373050116
710	chr11	65482827	65482827	+	1.86517468137026e-14	1.72441766548487e-11	-29.9427771760488
1472	chr16	88811169	88811169	+	1.11022302462516e-16	1.37132955216678e-13	-29.9332851056989
3628	chr8	47326924	47326924	+	2.93699509157364e-11	1.63447884922129e-08	-29.905523255814
2327	chr21	47581219	47581219	+	1.4432899320127001e-15	1.56766281433112e-12	-29.8938179923132
2044	chr2	131039761	131039761	+	6.32995402649605e-07	0.0001315137633295	-29.8919817199834
2176	chr20	17595328	17595328	+	1.11022302462516e-16	1.37132955216678e-13	-29.8758248476799
1117	chr14	35854113	35854113	+	3.8074396968568205e-09	1.42560994827164e-06	-29.8615688859591
1700	chr18	43925953	43925953	+	1.7535598528795e-09	7.03962151185424e-07	-29.8420356392499
1545	chr17	17403178	17403178	+	1.11022302462516e-16	1.37132955216678e-13	-29.8382446663227
1937	chr2	20665887	20665887	+	1.0906138880884e-08	3.69277993926194e-06	-29.8339761864833
455	chr10	71417972	71417972	+	1.6118217871507998e-12	1.10455110108825e-09	-29.8243146301324
3470	chr7	121081052	121081052	+	1.38178357644847e-12	9.56090509795418e-10	-29.8145734732606
2448	chr22	48727673	48727673	+	2.03947969623641e-13	1.60727838017389e-10	-29.8130276338198
2438	chr22	46858686	46858686	+	4.3913650493721e-11	2.37431545353108e-08	-29.8010737885463
3435	chr7	70814125	70814125	+	1.11022302462516e-16	1.37132955216678e-13	-29.7882151444287
3561	chr8	1398661	1398661	+	2.35367281220533e-13	1.84002163592203e-10	-29.775641025641
3126	chr6	80036983	80036983	+	1.11022302462516e-16	1.37132955216678e-13	-29.7702297702298
1100	chr13	114853177	114853177	+	6.224458060088981e-09	2.22606958539334e-06	-29.7581284694687
2752	chr4	117220515	117220515	+	8.45628940648879e-07	0.00016826040976	-29.7548237342231
2053	chr2	145226929	145226929	+	1.11022302462516e-16	1.37132955216678e-13	-29.7460008646779
2316	chr21	46805336	46805336	+	2.62168065034984e-12	1.7324824446767902e-09	-29.7435897435897
1538	chr17	16351815	16351815	+	2.2204460492503099e-16	2.6476607245991e-13	-29.7366091190792
1189	chr14	105411780	105411780	+	1.11022302462516e-16	1.37132955216678e-13	-29.7232815097291
2574	chr3	146214126	146214126	+	6.44595488097366e-13	4.70957163319263e-10	-29.7227872529077
3718	chr8	145014732	145014732	+	1.22124532708767e-15	1.3369052300753499e-12	-29.713729308666
1480	chr16	89804855	89804855	+	5.22531414803851e-08	1.49638440442887e-05	-29.6957956665232
1284	chr15	99504437	99504437	+	1.00420116666555e-10	5.09792469046582e-08	-29.6944824441404
1006	chr13	64808659	64808659	+	3.84530773889225e-08	1.13874601129442e-05	-29.6879957694342
3432	chr7	67058972	67058972	+	1.7901635729344902e-09	7.17672025674081e-07	-29.6859597239825
285	chr1	228504238	228504238	+	1.4043322060786098e-11	8.24330481608085e-09	-29.6729417633853
665	chr11	12229115	12229115	+	4.76330086485177e-12	3.0234567079935202e-09	-29.6536796536797
3661	chr8	125852353	125852353	+	1.42259093394159e-10	7.0363678791614e-08	-29.6485260770975
753	chr11	109957825	109957825	+	1.21035545631587e-05	0.0015225838436406	-29.6478296478296
2429	chr22	44689290	44689290	+	6.40010267005664e-12	3.97699382436852e-09	-29.6400702700494
199	chr1	146550074	146550074	+	1.19904086659517e-14	1.14137088022438e-11	-29.6282145169336
273	chr1	222162028	222162028	+	7.7553012012288e-08	2.12642230511057e-05	-29.5963424641476
1382	chr16	70182249	70182249	+	1.4436785100713199e-11	8.455605804055661e-09	-29.5653853583156
2281	chr21	43434243	43434243	+	3.33066907387547e-16	3.90153688040404e-13	-29.5642701525055
344	chr10	1068801	1068801	+	1.85241899597344e-09	7.39590238160464e-07	-29.5512820512821
2941	chr5	142562569	142562569	+	1.19472176596247e-09	4.95666489031263e-07	-29.5451563525038
1587	chr17	56566398	56566398	+	2.06664196866768e-09	8.16872284732702e-07	-29.5302013422819
1057	chr13	113487043	113487043	+	9.10382880192628e-15	8.79470901765646e-12	-29.5269947443861
2721	chr4	40834874	40834874	+	2.2204460492503099e-16	2.6476607245991e-13	-29.5049610583591
3235	chr6	170595429	170595429	+	1.4210854715202e-14	1.33750724593965e-11	-29.496109821174
1602	chr17	71533396	71533396	+	3.3603120286329597e-12	2.1836062348394e-09	-29.4734972633482
2630	chr4	1356779	1356779	+	3.33066907387547e-16	3.90153688040404e-13	-29.4653855629465
3098	chr6	33740381	33740381	+	1.11022302462516e-16	1.37132955216678e-13	-29.4478037345835
3204	chr6	168665133	168665133	+	9.45591838164006e-09	3.25369716959193e-06	-29.4409362912024
478	chr10	85576980	85576980	+	1.07602626808756e-08	3.64676262599934e-06	-29.4302352135191
3093	chr6	33142538	33142538	+	1.31144102244463e-08	4.35729971972046e-06	-29.4280078895464
992	chr13	45225530	45225530	+	5.06261699229071e-14	4.3647552956449395e-11	-29.4138038617534
63	chr1	15613477	15613477	+	1.37667655053519e-14	1.3003107938228e-11	-29.3894542090657
991	chr13	44736185	44736185	+	1.5543122344752201e-15	1.68200872511699e-12	-29.3645067712796
2959	chr5	161128914	161128914	+	5.67704661058599e-10	2.50934940122917e-07	-29.3637678165668
2522	chr3	46022704	46022704	+	2.80503842375879e-10	1.31222457453281e-07	-29.3603411513859
69	chr1	18676276	18676276	+	4.2854608750531e-14	3.7321141896014195e-11	-29.3553355335534
613	chr11	1458360	1458360	+	5.332845276484479e-12	3.3572952053807604e-09	-29.3313432835821
3818	chr9	138820010	138820010	+	1.24344978758018e-14	1.1805714711788e-11	-29.3248945147679
1811	chr19	18455481	18455481	+	1.10869091685117e-11	6.607324910559191e-09	-29.3168331162252
294	chr1	233636051	233636051	+	4.56309323659809e-10	2.05483191185464e-07	-29.3161796304254
2148	chr2	242405021	242405021	+	2.9841573656597094e-11	1.65883239043453e-08	-29.3104613824573
1256	chr15	74500104	74500104	+	3.17419494022531e-08	9.59720216544672e-06	-29.3023255813953
1192	chr14	105418263	105418263	+	1.6013079751076e-11	9.31174126550442e-09	-29.2938817049808
1813	chr19	30024772	30024772	+	4.09894340691608e-13	3.09525818991866e-10	-29.2929292929293
933	chr12	129330159	129330159	+	1.02025721204768e-10	5.17136012045255e-08	-29.2847503373819
2459	chr22	50473961	50473961	+	2.21009877066081e-11	1.26014842620373e-08	-29.270854562842
206	chr1	151238221	151238221	+	3.23074900165921e-14	2.8752001074914296e-11	-29.2484381901937
2682	chr4	7781848	7781848	+	1.68753899743024e-14	1.57060851075264e-11	-29.227401741473
93	chr1	25895406	25895406	+	3.43058914609173e-14	3.0410240233464895e-11	-29.2253817061213
557	chr10	134300815	134300815	+	7.771561172376101e-16	8.70959707528981e-13	-29.2096610513497
2686	chr4	8389386	8389386	+	2.2204460492503099e-16	2.6476607245991e-13	-29.1960865987341
489	chr10	98380544	98380544	+	1.62482249876916e-11	9.44077803804758e-09	-29.1938997821351
309	chr1	245030140	245030140	+	4.44750236638924e-10	2.00679436782117e-07	-29.1873551804038
2404	chr22	37532699	37532699	+	1.22124532708767e-15	1.3369052300753499e-12	-29.1748844602749
2410	chr22	40011272	40011272	+	8.46033388901546e-07	0.0001683065512548	-29.1431556948798
3161	chr6	139013114	139013114	+	9.880984919163891e-14	8.15146586152793e-11	-29.1382632658558
3031	chr6	25882537	25882537	+	2.2204460492503099e-16	2.6476607245991e-13	-29.1332780694483
2797	chr5	476353	476353	+	1.4432899320127001e-15	1.56766281433112e-12	-29.1261218705716
3193	chr6	167437988	167437988	+	1.2377099345428599e-11	7.3210543765456e-09	-29.123899265242
2634	chr4	1614207	1614207	+	8.959499808725011e-14	7.439513408711859e-11	-29.1170663556905
1938	chr2	21443168	21443168	+	2.74741862593686e-09	1.06032188220484e-06	-29.1143985206657
1932	chr2	18965225	18965225	+	1.8984813721090202e-14	1.7513374219836397e-11	-29.1129091041621
3002	chr6	3368228	3368228	+	3.64153152077051e-13	2.76626932652974e-10	-29.1063331870704
1211	chr15	33586189	33586189	+	7.7715611723761e-15	7.58278024794321e-12	-29.1055788271135
930	chr12	129279931	129279931	+	2.76445533131664e-14	2.4920555993890697e-11	-29.0910883280757
1878	chr19	58358543	58358543	+	1.99840144432528e-15	2.1310581182031996e-12	-29.091061827957
2446	chr22	48718134	48718134	+	1.47250212023664e-10	7.26604196005636e-08	-29.0909090909091
2102	chr2	233409012	233409012	+	6.10622663543836e-15	6.04456644112214e-12	-29.0879672434289
685	chr11	43938597	43938597	+	1.12132525487141e-14	1.06878387823255e-11	-29.0633608815427
2700	chr4	10109122	10109122	+	3.5527136788005e-15	3.63234628548774e-12	-29.0526711499102
3508	chr7	152569885	152569885	+	1.89881443901641e-12	1.2843774633483201e-09	-29.0505036598518
2408	chr22	38007811	38007811	+	3.3306690738754704e-15	3.4148700515940098e-12	-29.050025463235
3101	chr6	34082943	34082943	+	6.66133814775094e-16	7.50561349807416e-13	-29.0383583875449
3206	chr6	169049679	169049679	+	7.96029908656237e-14	6.676134569826829e-11	-29.0383020109271
1698	chr18	42255446	42255446	+	5.506706202140779e-13	4.07522796081238e-10	-29.0220070041939
1860	chr19	54291279	54291279	+	7.017719738655609e-13	5.08495992097632e-10	-29.0198511166253
3635	chr8	65670363	65670363	+	7.81652520487341e-12	4.782004911519871e-09	-29.0025850926325
150	chr1	77758357	77758357	+	3.9190872769268e-14	3.4417285033203294e-11	-28.9934971913771
2185	chr20	24659570	24659570	+	2.4535928844216e-14	2.23176318218018e-11	-28.9740110635633
10	chr1	1606306	1606306	+	1.11022302462516e-16	1.37132955216678e-13	-28.9739050719942
1915	chr2	3411922	3411922	+	2.6839530598010697e-11	1.50539595742981e-08	-28.9423076923077
657	chr11	9072944	9072944	+	1.1215695039368298e-11	6.67863495260466e-09	-28.9168278529981
359	chr10	2543736	2543736	+	3.13016279562817e-12	2.04130322527053e-09	-28.8446032818322
1840	chr19	46859300	46859300	+	4.4447315883378e-07	9.72553186391514e-05	-28.8278388278388
2121	chr2	239312700	239312700	+	2.2204460492503099e-16	2.6476607245991e-13	-28.8232058381312
2061	chr2	159559429	159559429	+	2.1094237467878e-15	2.2396558226625098e-12	-28.8127551583361
3321	chr7	1201265	1201265	+	1.6115158096852201e-09	6.50957739580207e-07	-28.8121222661855
1777	chr19	4851850	4851850	+	1.49890893030857e-08	4.90937226775143e-06	-28.8063063063063
198	chr1	146550067	146550067	+	1.28119737041743e-13	1.038210020571e-10	-28.7956408820085
1004	chr13	51799635	51799635	+	1.87459593403716e-08	5.99677995725989e-06	-28.770433546553
519	chr10	126839292	126839292	+	2.9420910152566604e-14	2.6351396477105e-11	-28.7600806451613
1214	chr15	41100358	41100358	+	6.18838313926062e-13	4.53610738938607e-10	-28.7581699346405
912	chr12	123632929	123632929	+	1.11022302462516e-16	1.37132955216678e-13	-28.7544309986554
1548	chr17	18170948	18170948	+	5.3780091491262296e-11	2.86421812312919e-08	-28.7484230544729
3622	chr8	39835650	39835650	+	1.39030151613539e-07	3.54808262671016e-05	-28.7370862323424
3642	chr8	81161498	81161498	+	1.42441614059408e-13	1.14633005136238e-10	-28.7294034716715
794	chr12	212198	212198	+	8.28226376370367e-14	6.9263076964161e-11	-28.7120124143382
1118	chr14	37257671	37257671	+	1.62092561595273e-14	1.5143909244129398e-11	-28.7119856887299
2556	chr3	127433096	127433096	+	1.11022302462516e-16	1.37132955216678e-13	-28.6902580008459
2443	chr22	48310843	48310843	+	1.42036826744629e-10	7.02893857692254e-08	-28.6635096027361
1615	chr17	74523319	74523319	+	4.33131308597012e-12	2.7624398755549e-09	-28.6611331649224
2367	chr22	22440266	22440266	+	4.39996705736689e-10	1.98595804487061e-07	-28.6594473487677
928	chr12	129123079	129123079	+	1.05360165036927e-13	8.6406867822866e-11	-28.6492890995261
1116	chr14	35108886	35108886	+	4.8502164506913906e-09	1.772949845442e-06	-28.6093802830508
5	chr1	922008	922008	+	2.37942998637664e-12	1.5849238225601902e-09	-28.6033502796899
1112	chr14	25183062	25183062	+	4.22948226708186e-06	0.0006482689142953	-28.6016389109173
1862	chr19	54611286	54611286	+	1.2125633830351e-11	7.1766646534514104e-09	-28.5966906656562
1992	chr2	86424249	86424249	+	3.73214218418738e-08	1.10893682859198e-05	-28.5964912280702
1226	chr15	42132896	42132896	+	1.66533453693773e-15	1.79221021096898e-12	-28.5950471366259
2024	chr2	113338563	113338563	+	1.01474384450739e-13	8.350093515472309e-11	-28.5819611698206
1715	chr18	72077904	72077904	+	1.57318602589385e-13	1.2598191427944e-10	-28.5757340911048
1416	chr16	85465608	85465608	+	1.11022302462516e-16	1.37132955216678e-13	-28.5704334742723
3399	chr7	39609804	39609804	+	1.06248343456627e-13	8.706206893286269e-11	-28.5641866003324
3353	chr7	2615491	2615491	+	8.881784197001249e-16	9.88191546489155e-13	-28.5584057663769
1305	chr16	1370309	1370309	+	3.9610392743583103e-10	1.80286160106245e-07	-28.5535390898933
664	chr11	11560766	11560766	+	4.28348245762322e-10	1.93846497522722e-07	-28.543956043956
1589	chr17	59736794	59736794	+	1.36640144710043e-06	0.0002525611988972	-28.5416666666667
314	chr1	246022071	246022071	+	1.17250653630663e-12	8.19033335106866e-10	-28.5411811299487
1990	chr2	85093000	85093000	+	1.53462170970897e-07	3.86448722283244e-05	-28.5399449035813
2757	chr4	130053710	130053710	+	2.0872192862952902e-14	1.9157835172761097e-11	-28.5361273104675
192	chr1	146549944	146549944	+	1.4432899320127e-14	1.3579690102276598e-11	-28.5284997894576
602	chr11	698807	698807	+	4.85167461761193e-13	3.61700135762883e-10	-28.5144586280836
3445	chr7	77046222	77046222	+	2.2204460492503099e-16	2.6476607245991e-13	-28.5012785408794
2907	chr5	109076336	109076336	+	6.0129679013698494e-12	3.751567015862271e-09	-28.4814600604074
910	chr12	122611600	122611600	+	2.2204460492503099e-16	2.6476607245991e-13	-28.4756315751807
229	chr1	179202209	179202209	+	6.47258089347957e-08	1.81016401719908e-05	-28.4737732656514
878	chr12	96819422	96819422	+	6.8833827526759706e-15	6.768082727256459e-12	-28.4640522875817
3352	chr7	2614414	2614414	+	1.11022302462516e-16	1.37132955216678e-13	-28.4600490070083
3131	chr6	88825341	88825341	+	5.87361129733566e-08	1.65930755710958e-05	-28.4379218441729
3494	chr7	143805413	143805413	+	1.66799145606689e-08	5.39612394580834e-06	-28.4272763106031
2081	chr2	208689905	208689905	+	1.11809539404817e-09	4.66588055784978e-07	-28.4191508581752
1773	chr19	3831709	3831709	+	1.4432899320127001e-15	1.56766281433112e-12	-28.4163345068784
2542	chr3	109645371	109645371	+	7.90589815835574e-13	5.66867145512883e-10	-28.4057971014493
1746	chr19	690383	690383	+	4.7201831332444e-10	2.12035100552479e-07	-28.3997469955724
2751	chr4	110897315	110897315	+	9.7142294208652e-12	5.84161482090738e-09	-28.3950617283951
2076	chr2	191164968	191164968	+	4.44089209850063e-16	5.12208073958707e-13	-28.3882459952499
2889	chr5	72446568	72446568	+	1.11022302462516e-16	1.37132955216678e-13	-28.3877702024206
465	chr10	73590657	73590657	+	1.6263879132338798e-11	9.446319728920231e-09	-28.3828899321857
2242	chr20	60853588	60853588	+	5.55111512312578e-16	6.337650622479709e-13	-28.3683879919099
2929	chr5	134568746	134568746	+	1.7813528430110598e-12	1.2116472787596101e-09	-28.3622519950216
3355	chr7	2649777	2649777	+	6.66133814775094e-16	7.50561349807416e-13	-28.3621535905762
1561	chr17	30822561	30822561	+	1.11022302462516e-16	1.37132955216678e-13	-28.3593659687608
3324	chr7	1258546	1258546	+	7.238654120556021e-14	6.11119206671143e-11	-28.3558585027618
2776	chr4	186389368	186389368	+	4.44089209850063e-16	5.12208073958707e-13	-28.3479636623456
2006	chr2	101086893	101086893	+	1.11022302462516e-16	1.37132955216678e-13	-28.3465005007233
1510	chr17	1090272	1090272	+	7.87956366821163e-11	4.07219878588507e-08	-28.3391250111378
2396	chr22	30691306	30691306	+	3.18967074974807e-13	2.4394816529523603e-10	-28.334315645379
55	chr1	11938049	11938049	+	1.90980564696019e-12	1.29151348175751e-09	-28.3164983164983
855	chr12	49021414	49021414	+	5.53557200078103e-13	4.09451896599806e-10	-28.3011206756537
1983	chr2	71190384	71190384	+	5.995204332975851e-15	5.9427067849081095e-12	-28.2752929526324
3029	chr6	25882516	25882516	+	1.11022302462516e-16	1.37132955216678e-13	-28.2688781698683
1641	chr17	79042975	79042975	+	2.2315482794965602e-14	2.04185310045561e-11	-28.2680031024402
2572	chr3	143060900	143060900	+	8.54982751263833e-13	6.10643945317279e-10	-28.2605660490257
1461	chr16	88760962	88760962	+	5.83022967237667e-06	0.0008431071055049	-28.2414781777636
2287	chr21	43869662	43869662	+	1.04722549520986e-08	3.5590469849271e-06	-28.2402137873014
1521	chr17	3378876	3378876	+	3.3306690738754704e-15	3.4148700515940098e-12	-28.2394366197183
1133	chr14	71921575	71921575	+	6.3390404037022595e-12	3.941561099649761e-09	-28.2259703312335
1341	chr16	19508824	19508824	+	8.34638236302254e-09	2.90664264181961e-06	-28.2256833104291
2605	chr3	194367758	194367758	+	2.9069618934229904e-09	1.11673994092888e-06	-28.2256273595381
414	chr10	17703994	17703994	+	5.06261699229071e-13	3.75893922187742e-10	-28.2230806373733
929	chr12	129277164	129277164	+	7.99293964348635e-12	4.88074805875894e-09	-28.2014157014157
1936	chr2	20581303	20581303	+	7.07767178198537e-13	5.12251623680553e-10	-28.1979458450047
866	chr12	66150864	66150864	+	8.49181910345109e-08	2.3043996199077e-05	-28.164497264667
3358	chr7	2944317	2944317	+	2.2716384329157797e-11	1.29196424481089e-08	-28.1516696259809
1670	chr17	80790387	80790387	+	2.88657986402541e-15	2.9920535754927597e-12	-28.1420027011383
1704	chr18	51569929	51569929	+	1.34159350295704e-12	9.31298457399866e-10	-28.1268773278866
1198	chr14	106598077	106598077	+	2.3314683517128303e-15	2.45051271159285e-12	-28.1229454306377
3054	chr6	31237405	31237405	+	1.64313007644523e-14	1.53317792392952e-11	-28.1047411707789
2393	chr22	27014467	27014467	+	1.8540724511240102e-14	1.7163224024577002e-11	-28.1017369727047
3834	chrX	34150506	34150506	+	4.44089209850063e-16	5.12208073958707e-13	-28.1007255655143
834	chr12	11333439	11333439	+	5.17221043772054e-10	2.30465454447109e-07	-28.1005615913504
1421	chr16	85541384	85541384	+	5.99698068981525e-12	3.744786239134291e-09	-28.0952380952381
1471	chr16	88811152	88811152	+	3.21708102379858e-08	9.70881125470266e-06	-28.0830280830281
513	chr10	126234469	126234469	+	9.2769466553122e-09	3.19737838817368e-06	-28.0748663101604
71	chr1	20142433	20142433	+	2.630118345337e-13	2.04357998694048e-10	-28.0215805391648
443	chr10	45476128	45476128	+	1.6932899526978e-11	9.809302551625661e-09	-28.0020283975659
902	chr12	118326791	118326791	+	7.40241201668823e-11	3.84529947813094e-08	-27.9888551165147
3066	chr6	32411846	32411846	+	5.03503041815456e-07	0.000108165751446	-27.9781812390508
3163	chr6	139013146	139013146	+	1.76203496238259e-12	1.1993439326089302e-09	-27.9680365296804
953	chr12	132939425	132939425	+	1.83630888273001e-13	1.45578873986005e-10	-27.9668411867365
3794	chr9	134739144	134739144	+	3.89648313614543e-11	2.1311581783526e-08	-27.96519910923
360	chr10	2543763	2543763	+	1.06603614824508e-12	7.49491171711098e-10	-27.955483490566
1448	chr16	88091946	88091946	+	2.63666866118228e-12	1.7412072762585102e-09	-27.9472404668843
2072	chr2	179737144	179737144	+	5.11407298731115e-08	1.46792270113778e-05	-27.9366102290702
2136	chr2	240874769	240874769	+	1.11022302462516e-16	1.37132955216678e-13	-27.9059169050814
852	chr12	48110612	48110612	+	1.2066680987743399e-11	7.14610911841965e-09	-27.9041850821193
920	chr12	124273028	124273028	+	4.50084414183038e-13	3.37609524240525e-10	-27.8935372135178
2933	chr5	137419493	137419493	+	4.06809261976893e-05	0.003922579312056	-27.8907824812168
3256	chr7	751219	751219	+	2.1094237467878e-15	2.2396558226625098e-12	-27.883208917583
2154	chr2	242629528	242629528	+	1.34701724108233e-07	3.45237385892067e-05	-27.8782699520486
1706	chr18	55852295	55852295	+	6.96109836439973e-14	5.887058316748849e-11	-27.8777746818984
2565	chr3	132911617	132911617	+	4.36428670980149e-13	3.28292029213513e-10	-27.8717461302712
1944	chr2	25305136	25305136	+	6.32526253596666e-11	3.32710235839692e-08	-27.871226988132
1766	chr19	2465737	2465737	+	9.130683764624342e-09	3.15212731554975e-06	-27.8680371352785
1925	chr2	10942687	10942687	+	4.27397117697126e-09	1.5802733245832e-06	-27.8661214599424
1560	chr17	30822537	30822537	+	5.6621374255883e-15	5.62589694951572e-12	-27.8478142572102
506	chr10	123442157	123442157	+	3.58735263716881e-12	2.3198085913788503e-09	-27.843137254902
2724	chr4	42894255	42894255	+	3.06456849341608e-07	7.04872564737641e-05	-27.8181577904057
3757	chr9	96026242	96026242	+	7.63278329429795e-13	5.49303320215108e-10	-27.8171999821484
3154	chr6	134775478	134775478	+	6.65245636355394e-13	4.84110639562943e-10	-27.8135405105438
1567	chr17	30822724	30822724	+	1.627028844986e-08	5.27468573257929e-06	-27.8111510248438
676	chr11	18816245	18816245	+	6.361577931102151e-14	5.41446618180516e-11	-27.8080929771101
3368	chr7	5170952	5170952	+	1.25096018877002e-07	3.23651444625228e-05	-27.7920025288446
2265	chr20	62790472	62790472	+	5.32907051820075e-14	4.5729215846331e-11	-27.7881619937695
2162	chr2	242699031	242699031	+	1.11022302462516e-16	1.37132955216678e-13	-27.7648683235671
560	chr10	134613134	134613134	+	1.33226762955019e-15	1.4530062060751799e-12	-27.7611608246403
3059	chr6	31637807	31637807	+	1.65423230669148e-14	1.5420620473188297e-11	-27.7426900584795
3378	chr7	16913788	16913788	+	9.35504071164495e-06	0.0012374783003087	-27.7395075902539
202	chr1	146742917	146742917	+	6.7612582199672e-14	5.7279847794777296e-11	-27.7389786119599
1016	chr13	99509145	99509145	+	1.02542703239727e-06	0.0001980302184644	-27.7373823781009
859	chr12	53217055	53217055	+	1.21281205078816e-07	3.1497919978234e-05	-27.7310924369748
935	chr12	130623235	130623235	+	6.30052676697801e-11	3.31587946687836e-08	-27.7302759424796
3205	chr6	168680376	168680376	+	5.55111512312578e-16	6.337650622479709e-13	-27.7256129368805
11	chr1	1608229	1608229	+	2.41638211884165e-07	5.73129436254772e-05	-27.7256022866476
954	chr12	132940844	132940844	+	4.66023388767667e-08	1.35073045370761e-05	-27.722521381058
3760	chr9	99065384	99065384	+	1.8283593528067902e-09	7.31181456539907e-07	-27.7153558052434
2879	chr5	43206727	43206727	+	6.96442903347361e-13	5.04804751426264e-10	-27.7139208173691
1597	chr17	65484443	65484443	+	1.66533453693773e-14	1.55142297472927e-11	-27.7054333183655
2359	chr22	20378493	20378493	+	9.89588165856148e-08	2.63220066475351e-05	-27.6969696969697
843	chr12	25194024	25194024	+	7.13553129916278e-08	1.9748074154122e-05	-27.6794222378254
656	chr11	8714324	8714324	+	1.69735780986002e-10	8.27787413525574e-08	-27.6788503592627
3014	chr6	16962712	16962712	+	5.66551827674289e-09	2.0421482379618e-06	-27.6754303794833
217	chr1	161718740	161718740	+	8.17117318252514e-08	2.22671161941025e-05	-27.6734480959833
3733	chr9	19126476	19126476	+	4.24101309626224e-10	1.92043373334999e-07	-27.6575748288896
2499	chr3	22158910	22158910	+	1.43517910888846e-08	4.73028850225157e-06	-27.6569142285571
662	chr11	11375573	11375573	+	3.1741276274033197e-12	2.06813077004422e-09	-27.6523796561905
1295	chr16	836991	836991	+	5.95745675013859e-13	4.38110462903742e-10	-27.6283675959824
1799	chr19	12199754	12199754	+	3.34420612757569e-07	7.60818736146636e-05	-27.6148582600195
1245	chr15	68499660	68499660	+	5.029676675150089e-11	2.69109364535572e-08	-27.6117713638936
3111	chr6	37519372	37519372	+	9.85617895103985e-05	0.0076320557075137	-27.5762936753649
862	chr12	59315540	59315540	+	4.53637127861839e-13	3.40012942912744e-10	-27.5757406476361
2441	chr22	47367885	47367885	+	1.38513974179411e-07	3.53728461806035e-05	-27.5540229885057
193	chr1	146549986	146549986	+	1.14686038443779e-13	9.36090973356441e-11	-27.5514192647743
240	chr1	184633716	184633716	+	2.47929454744167e-10	1.17372416960669e-07	-27.5457875457875
358	chr10	2543734	2543734	+	3.8840597404998795e-11	2.1247604277887e-08	-27.5380143112701
365	chr10	2543931	2543931	+	2.92321722383804e-13	2.2509930721094201e-10	-27.5295051558083
1190	chr14	105411956	105411956	+	2.50577336657898e-13	1.952668469614e-10	-27.5287086523184
1281	chr15	96608104	96608104	+	2.90679483749834e-06	0.0004756315662512	-27.5074478649454
3604	chr8	20048583	20048583	+	1.0492717805732399e-12	7.382368821963061e-10	-27.4922708977425
2453	chr22	49146298	49146298	+	9.992007221626409e-16	1.1004184185829099e-12	-27.4844564552501
366	chr10	2543954	2543954	+	8.881784197001249e-16	9.88191546489155e-13	-27.4841414901623
184	chr1	117263867	117263867	+	9.72039099322863e-07	0.0001892185165438	-27.4829931972789
127	chr1	44208122	44208122	+	6.65885556694334e-08	1.85693451341983e-05	-27.4678837052062
2606	chr3	194426244	194426244	+	2.22875051747451e-11	1.26905225576769e-08	-27.4556213017751
2910	chr5	110427346	110427346	+	2.11985984321927e-12	1.4220607603217e-09	-27.4553275349137
2595	chr3	184769911	184769911	+	1.04360964314765e-14	1.00090426959623e-11	-27.4529362932812
793	chr11	134721879	134721879	+	1.0098450964335401e-09	4.24990476018063e-07	-27.4519230769231
1168	chr14	100771578	100771578	+	8.64045361259613e-07	0.0001713190679731	-27.4327122153209
2687	chr4	8394376	8394376	+	1.2348122524485898e-11	7.305391318310561e-09	-27.4074074074074
2830	chr5	6371826	6371826	+	8.00985944238164e-11	4.135154300695e-08	-27.4067046173308
403	chr10	12591712	12591712	+	3.4919844793535e-12	2.26263779649669e-09	-27.3953047743878
919	chr12	124249319	124249319	+	4.44273806632367e-09	1.63750099711358e-06	-27.3938091983205
2369	chr22	22579341	22579341	+	1.11022302462516e-16	1.37132955216678e-13	-27.3901031266242
2402	chr22	35707235	35707235	+	2.13476902821697e-10	1.02297929104237e-07	-27.3845102894714
3735	chr9	34553999	34553999	+	7.90214682577783e-08	2.16202629682204e-05	-27.3532668881506
234	chr1	182026812	182026812	+	4.37427871702312e-14	3.802673218594e-11	-27.335771189761
228	chr1	178915052	178915052	+	8.71858141238135e-13	6.21180466409291e-10	-27.3350471293916
1306	chr16	1370614	1370614	+	1.65811675501004e-09	6.68581954953832e-07	-27.3317211503332
1922	chr2	8746930	8746930	+	4.6203474379780103e-10	2.07901463568028e-07	-27.3292349726776
3632	chr8	57802750	57802750	+	1.27798415294755e-07	3.29806026237692e-05	-27.3265946322761
3213	chr6	169310361	169310361	+	2.1094237467878e-15	2.2396558226625098e-12	-27.3222707423581
2480	chr3	11942361	11942361	+	1.9708322751554903e-09	7.81641628753816e-07	-27.317777346864
942	chr12	132081603	132081603	+	4.84390305643956e-12	3.0686273155941904e-09	-27.3138849035549
2852	chr5	10636253	10636253	+	1.60236198976094e-07	4.01640603936491e-05	-27.3071342963477
100	chr1	28298951	28298951	+	1.49880108324396e-13	1.20222522128898e-10	-27.3010226767452
2454	chr22	49202383	49202383	+	2.2204460492503099e-16	2.6476607245991e-13	-27.294701986755
2587	chr3	171024824	171024824	+	1.07727160525428e-11	6.433181419015331e-09	-27.2905702700371
2930	chr5	136324790	136324790	+	5.23026066900911e-12	3.2969690024753303e-09	-27.2889816881465
3320	chr7	1201208	1201208	+	1.98400779893859e-06	0.0003451779454506	-27.2842181292885
435	chr10	33492543	33492543	+	1.7261727047746e-08	5.56833998635756e-06	-27.2648083623693
857	chr12	51422570	51422570	+	1.8540724511240102e-14	1.7163224024577002e-11	-27.2613782279926
3277	chr7	891184	891184	+	1.5329097990957102e-09	6.2152207908501e-07	-27.2526047489156
1544	chr17	17397130	17397130	+	7.75602915226159e-11	4.01757991404702e-08	-27.2488906817265
1935	chr2	20409321	20409321	+	4.25250126223631e-08	1.24584089788135e-05	-27.2418340434165
2292	chr21	44440526	44440526	+	6.47970010980714e-10	2.83628691259447e-07	-27.2383866133866
3023	chr6	25882434	25882434	+	1.11022302462516e-16	1.37132955216678e-13	-27.2291582762787
2323	chr21	47423388	47423388	+	2.2204460492503099e-16	2.6476607245991e-13	-27.2232645403377
3727	chr9	614629	614629	+	1.12314291200732e-09	4.68360445289104e-07	-27.2195975503062
2749	chr4	110866441	110866441	+	2.7923552359254696e-11	1.56170714768849e-08	-27.2184531886024
2504	chr3	24139780	24139780	+	1.94172689038652e-09	7.71143485264424e-07	-27.2134387351779
1959	chr2	40424443	40424443	+	4.21056384203311e-07	9.28396027657025e-05	-27.2091661175782
1251	chr15	71864977	71864977	+	3.1086244689504403e-15	3.1995438569935497e-12	-27.204156364433
3060	chr6	32132727	32132727	+	3.05633978570086e-07	7.03366915534644e-05	-27.2039473684211
3753	chr9	93943920	93943920	+	3.994395068041e-07	8.87150004334659e-05	-27.1915584415584
3118	chr6	44329112	44329112	+	1.57651669496772e-13	1.26145069371014e-10	-27.1887159533074
1778	chr19	5034179	5034179	+	6.02629057766535e-13	4.42949848302011e-10	-27.1820771820772
2486	chr3	13726683	13726683	+	2.5105406642467203e-10	1.18736381672399e-07	-27.1699599951509
3793	chr9	134667680	134667680	+	3.43921379186707e-06	0.000546937897446	-27.1459633200983
2045	chr2	132208937	132208937	+	3.22558355037028e-06	0.0005187437793528	-27.1434294871795
3313	chr7	1139076	1139076	+	1.61204383175573e-13	1.28811658590624e-10	-27.1422287976329
1397	chr16	81173193	81173193	+	1.1227896390408901e-09	4.68279862415936e-07	-27.1416755287723
2099	chr2	220473354	220473354	+	3.5527136788004997e-14	3.1426164054008196e-11	-27.1415178893364
1716	chr18	72916165	72916165	+	5.8841820305133305e-15	5.834633161009969e-12	-27.1360153256705
2536	chr3	71828420	71828420	+	5.01931829433033e-13	3.73152463535688e-10	-27.1341540697429
1489	chr17	99757	99757	+	1.53543844305659e-13	1.23093809251012e-10	-27.1265828743586
3398	chr7	38433361	38433361	+	3.6637359812630205e-15	3.7432412849071996e-12	-27.1208612111854
1455	chr16	88177636	88177636	+	1.11349537257333e-07	2.91906028652262e-05	-27.1147561588738
2360	chr22	20378495	20378495	+	4.03687385741591e-08	1.19005648194729e-05	-27.1098538425271
352	chr10	1251780	1251780	+	5.3290705182007506e-15	5.3130025906640094e-12	-27.0847573479152
485	chr10	95807240	95807240	+	6.55655107650865e-07	0.0001355479405738	-27.0743333829882
1729	chr18	76808880	76808880	+	1.0880185641326501e-14	1.0407669548550001e-11	-27.0699209998821
387	chr10	5652754	5652754	+	1.36586852939047e-10	6.78102636968972e-08	-27.0677307141396
3792	chr9	134396142	134396142	+	1.33226762955019e-15	1.4530062060751799e-12	-27.0655806182122
3657	chr8	123806239	123806239	+	6.78235245743508e-13	4.92461149945128e-10	-27.0583832335329
3618	chr8	29710471	29710471	+	8.21565038222616e-15	7.97883499741617e-12	-27.0440745393635
1979	chr2	65886487	65886487	+	3.1778368825286004e-10	1.47226553628509e-07	-27.0388349514563
2223	chr20	56413817	56413817	+	2.40918396343659e-14	2.19273249415562e-11	-27.0355198922619
2241	chr20	60812329	60812329	+	5.2685633633586796e-12	3.3189686887952304e-09	-27.0299178909617
2773	chr4	185377221	185377221	+	3.9081315961198005e-10	1.78155186192462e-07	-27.0268724985706
1858	chr19	53162348	53162348	+	4.97205049354577e-08	1.43123809615687e-05	-27.0207996014448
1532	chr17	9821249	9821249	+	3.5392799802025398e-12	2.29226782748694e-09	-27.0099277978339
1897	chr2	1595717	1595717	+	3.33066907387547e-16	3.90153688040404e-13	-27.0052698880149
415	chr10	17726069	17726069	+	5.4635185264828595e-12	3.43512628198729e-09	-26.9951540849549
2077	chr2	192242739	192242739	+	4.3207820654700405e-09	1.59576660326459e-06	-26.9905956112853
117	chr1	40226742	40226742	+	4.44089209850063e-16	5.12208073958707e-13	-26.9904560692194
3560	chr8	1340507	1340507	+	1.48769885299771e-14	1.3970573845222599e-11	-26.9755577368185
3073	chr6	32586221	32586221	+	1.3537966780941e-07	3.46701635571469e-05	-26.9722222222222
191	chr1	146549940	146549940	+	4.78506123613442e-14	4.1352065995712195e-11	-26.9677276009554
1349	chr16	27074111	27074111	+	4.59632332194815e-14	3.9815079915938495e-11	-26.9609079445145
1718	chr18	72916311	72916311	+	2.6741719949541198e-11	1.50048510866237e-08	-26.9601462138246
505	chr10	121207961	121207961	+	1.0857981180834e-13	8.87984559945017e-11	-26.9581226456714
1084	chr13	114743626	114743626	+	1.32720483725368e-06	0.0002463119907693	-26.9549132947977
2170	chr2	242948331	242948331	+	6.58255672192354e-11	3.4488007058804e-08	-26.9490437684508
2488	chr3	14345246	14345246	+	2.63917510068268e-09	1.02272860024006e-06	-26.9395195416766
474	chr10	81444184	81444184	+	2.9976021664879203e-15	3.0928897089296098e-12	-26.9288280617225
890	chr12	114254859	114254859	+	1.58359700908051e-08	5.15100405947211e-06	-26.9180341735747
242	chr1	196397818	196397818	+	3.31669820496927e-08	9.98420648379958e-06	-26.9163199260287
827	chr12	7986046	7986046	+	2.09148837138073e-08	6.61156902218576e-06	-26.8994864967668
2025	chr2	113673470	113673470	+	1.53210777398272e-14	1.4359955152257099e-11	-26.8954509177973
2127	chr2	240287490	240287490	+	1.92645899232957e-12	1.30187275547367e-09	-26.8761102370197
3463	chr7	101712396	101712396	+	8.4831860425183e-09	2.95056216159602e-06	-26.8677742154863
3506	chr7	151599729	151599729	+	1.2983281116874e-11	7.66102744947176e-09	-26.8660850297743
1129	chr14	62550876	62550876	+	3.76443320959652e-12	2.42627715629693e-09	-26.8637102941652
2602	chr3	192577951	192577951	+	2.96940250166244e-12	1.9442646565033902e-09	-26.857346838606
2669	chr4	5614007	5614007	+	1.2563915463559302e-09	5.19410964774496e-07	-26.8469683150256
2856	chr5	13769974	13769974	+	4.88498130835069e-15	4.89694783143735e-12	-26.8432803993879
2657	chr4	3324885	3324885	+	1.11022302462516e-16	1.37132955216678e-13	-26.8414275202355
1618	chr17	75084281	75084281	+	2.65788391295985e-10	1.24957719499716e-07	-26.841051648205
2028	chr2	114391988	114391988	+	9.431899705703019e-12	5.6835169828079606e-09	-26.838930936613
3375	chr7	10000209	10000209	+	9.13544251357479e-09	3.15306441307685e-06	-26.8129635273799
1804	chr19	15083795	15083795	+	1.65145674912992e-12	1.1288042670546901e-09	-26.8122009569378
2692	chr4	8508431	8508431	+	4.22994972382185e-14	3.6881614098947e-11	-26.8116862944449
2387	chr22	25000461	25000461	+	1.39086341077732e-06	0.0002564024272726	-26.8085800505668
1945	chr2	25473310	25473310	+	4.50750547997814e-14	3.90919964993402e-11	-26.789077212806
3218	chr6	169823935	169823935	+	5.27316572629388e-08	1.50875885071547e-05	-26.7881241565452
2544	chr3	112980332	112980332	+	1.65756297576536e-12	1.13271340627302e-09	-26.7818821459982
3569	chr8	1790861	1790861	+	9.733325256888749e-12	5.8506933051626e-09	-26.766364551863
2729	chr4	54956805	54956805	+	1.03390968786421e-07	2.73604406477832e-05	-26.7613545177339
3779	chr9	128866261	128866261	+	2.22640350600045e-10	1.06288850620247e-07	-26.7588417449883
2143	chr2	241439336	241439336	+	3.4426028694412005e-10	1.58289979010037e-07	-26.755980861244
3045	chr6	29917076	29917076	+	2.45065745474449e-10	1.1609183499956e-07	-26.7509727626459
2961	chr5	167574791	167574791	+	6.739908631203659e-11	3.52682176636452e-08	-26.7463001345406
2671	chr4	5754395	5754395	+	1.3745936033871e-07	3.51473944628582e-05	-26.7425320056899
1977	chr2	56037076	56037076	+	1.42879474918089e-09	5.83838644694633e-07	-26.7216494845361
2714	chr4	33062845	33062845	+	3.37141425887921e-12	2.1903342967523602e-09	-26.7139959432049
126	chr1	44171265	44171265	+	9.99200722162641e-15	9.60516339742046e-12	-26.7095922259969
1148	chr14	91842928	91842928	+	9.93094495527203e-13	7.02088427101916e-10	-26.708828084667
2720	chr4	40440853	40440853	+	1.09281017568463e-09	4.56752905536047e-07	-26.7065060543321
1675	chr18	7717536	7717536	+	2.61791788247479e-09	1.01556699453252e-06	-26.7049639122109
2875	chr5	39364553	39364553	+	3.33066907387547e-14	2.9596231786362896e-11	-26.7023746546758
689	chr11	59026901	59026901	+	1.54931623086441e-12	1.06371012060663e-09	-26.6992797934502
29	chr1	3769275	3769275	+	9.64152515603445e-08	2.5736684997577e-05	-26.6933626465662
1712	chr18	60732599	60732599	+	4.46309655899313e-14	3.87298114783928e-11	-26.6742424242424
2266	chr21	20418452	20418452	+	2.13827203965344e-06	0.0003676207929002	-26.6690144387986
723	chr11	69862928	69862928	+	6.66133814775094e-16	7.50561349807416e-13	-26.6688029974364
3300	chr7	1087283	1087283	+	1.49146250905119e-11	8.714544397733912e-09	-26.6654817495839
601	chr11	686713	686713	+	5.55111512312578e-15	5.52308689065471e-12	-26.6639539286663
246	chr1	201956029	201956029	+	2.2204460492503103e-15	2.3481602523188297e-12	-26.6560056858564
1908	chr2	3215593	3215593	+	9.992007221626409e-16	1.1004184185829099e-12	-26.6532258064516
3536	chr7	158250245	158250245	+	3.26286775376161e-11	1.80689671790605e-08	-26.6184210526316
2177	chr20	17600356	17600356	+	4.23857726694621e-10	1.91962779471071e-07	-26.608839322594
3843	chrX	148605887	148605887	+	3.11639603012281e-13	2.38968656797596e-10	-26.5999704608879
1954	chr2	34008110	34008110	+	3.6678438064541297e-11	2.01272551404279e-08	-26.5920736170658
3255	chr7	463009	463009	+	6.24023055451062e-10	2.7388411640683e-07	-26.5807962529274
1082	chr13	114527474	114527474	+	4.00321752135335e-05	0.0038748361396187	-26.5781275618954
2693	chr4	8510281	8510281	+	3.71924713249427e-14	3.2819894527829894e-11	-26.574338903106
3756	chr9	95993014	95993014	+	7.34479144171019e-12	4.50943463772769e-09	-26.5631469979296
3612	chr8	27254636	27254636	+	2.69784194983913e-14	2.4357580046504e-11	-26.5572895824997
140	chr1	58098949	58098949	+	1.94289029309402e-13	1.53487837227198e-10	-26.5417779139493
1238	chr15	63888494	63888494	+	5.31733324038441e-09	1.92780542209323e-06	-26.5386354938594
2670	chr4	5720344	5720344	+	4.27186603313423e-07	9.40070927499773e-05	-26.5333333333333
1906	chr2	3012947	3012947	+	6.62787149763311e-06	0.0009361466331033	-26.5240757830737
77	chr1	20739722	20739722	+	6.09734485124136e-13	4.47498092858901e-10	-26.5239418205589
1781	chr19	5148382	5148382	+	8.08575428834502e-13	5.79337275251033e-10	-26.5213045108084
1630	chr17	77962761	77962761	+	1.15130127653629e-13	9.394536693583859e-11	-26.5194323426649
3293	chr7	1049948	1049948	+	7.771561172376101e-16	8.70959707528981e-13	-26.5188834154351
1237	chr15	63192447	63192447	+	4.5761860967275006e-10	2.0600937604678e-07	-26.5185699409927
287	chr1	228743221	228743221	+	7.09017844435778e-10	3.07680995437158e-07	-26.5120521892968
1645	chr17	79467527	79467527	+	4.5843329132822e-12	2.9142837833469302e-09	-26.5031510815875
2812	chr5	1506384	1506384	+	1.22185426221222e-08	4.0907660364282e-06	-26.4983750283425
1955	chr2	36934886	36934886	+	1.73464247410493e-08	5.58950007903399e-06	-26.4950640450355
3112	chr6	39769455	39769455	+	8.881784197001249e-16	9.88191546489155e-13	-26.4933794500926
1909	chr2	3281451	3281451	+	5.39568389967826e-14	4.62736910496596e-11	-26.491539081386
3022	chr6	25882414	25882414	+	3.33066907387547e-16	3.90153688040404e-13	-26.4867485455721
2033	chr2	121286876	121286876	+	6.60804744256893e-13	4.80998547971707e-10	-26.4756314713447
2470	chr3	6249264	6249264	+	9.18785443282388e-08	2.47127909368183e-05	-26.474216629657
1077	chr13	114291729	114291729	+	1.40998324127395e-14	1.3279122080899699e-11	-26.4703623095634
1111	chr14	24987188	24987188	+	1.02180810257479e-07	2.70879175276238e-05	-26.4681995837775
434	chr10	31888431	31888431	+	4.6551207333323e-11	2.50719382900738e-08	-26.4600916325054
1369	chr16	31014246	31014246	+	1.11022302462516e-16	1.37132955216678e-13	-26.4588279395227
8	chr1	1225898	1225898	+	6.853828615760449e-11	3.58258920015352e-08	-26.4536225196124
3135	chr6	92836208	92836208	+	3.16906723085708e-10	1.46866769182049e-07	-26.4462809917355
2823	chr5	2141556	2141556	+	1.4473866549735698e-11	8.47562787659505e-09	-26.4460784313725
3279	chr7	893406	893406	+	8.37275693221784e-10	3.58186363511222e-07	-26.4222503160556
3592	chr8	9951983	9951983	+	5.8848481643281e-12	3.6818370036275105e-09	-26.4181764181764
3462	chr7	101586765	101586765	+	1.28855703884767e-07	3.32174423581482e-05	-26.4147769329116
3562	chr8	1440086	1440086	+	4.63740157385928e-13	3.46874620266874e-10	-26.4144871569832
256	chr1	205550777	205550777	+	9.23465269808688e-07	0.0001812096568507	-26.4061722249876
833	chr12	11126880	11126880	+	5.55111512312578e-16	6.337650622479709e-13	-26.4040898617511
1539	chr17	16761802	16761802	+	5.32004179931711e-07	0.0001133812324319	-26.3965884861407
3548	chr8	984032	984032	+	2.48745468667266e-12	1.65086570383322e-09	-26.3942002451017
3775	chr9	119153552	119153552	+	4.375912585175e-06	0.0006668356940928	-26.3923576423576
1989	chr2	80412430	80412430	+	6.71351862990832e-13	4.88190014931051e-10	-26.391804097951
1628	chr17	77358131	77358131	+	4.74043582165962e-10	2.1284684464081e-07	-26.3870276065398
2691	chr4	8475013	8475013	+	2.9976021664879203e-15	3.0928897089296098e-12	-26.3789973467393
790	chr11	134038538	134038538	+	1.11022302462516e-16	1.37132955216678e-13	-26.3776325752264
364	chr10	2543923	2543923	+	5.90372195574673e-12	3.6904890452938e-09	-26.3705667882002
2173	chr20	3651164	3651164	+	2.44927880558299e-05	0.0026547193524839	-26.3650793650794
1859	chr19	53239133	53239133	+	1.69597669241739e-12	1.1568025929126702e-09	-26.3488504519895
1713	chr18	60780085	60780085	+	7.94253551816837e-12	4.850981974281041e-09	-26.3407367280607
267	chr1	211835138	211835138	+	2.07722727907367e-13	1.6365858200577502e-10	-26.3342879458474
1459	chr16	88460245	88460245	+	1.34825484110479e-12	9.34880720073582e-10	-26.3323047051073
78	chr1	21009459	21009459	+	4.759898031281301e-10	2.13654852142824e-07	-26.3282308989321
962	chr12	133325638	133325638	+	4.578403656196881e-09	1.68115175754694e-06	-26.3234524276927
3100	chr6	34073788	34073788	+	1.37247920806161e-08	4.54153656371649e-06	-26.3066682421521
2778	chr4	186718493	186718493	+	4.2636050245903303e-10	1.93036518154228e-07	-26.3061585058052
660	chr11	11292699	11292699	+	3.7013314635459003e-10	1.6914966548435e-07	-26.3059163059163
1854	chr19	49558508	49558508	+	8.14731870857344e-09	2.84218897032477e-06	-26.3049561738246
1314	chr16	2285357	2285357	+	1.11022302462516e-16	1.37132955216678e-13	-26.3021784106121
1394	chr16	80231787	80231787	+	5.82227821510628e-10	2.56695232408036e-07	-26.2997871693524
2086	chr2	211536268	211536268	+	3.12184413875372e-08	9.46228986633116e-06	-26.2950926226844
1981	chr2	69867871	69867871	+	1.80512271796829e-10	8.76399672439904e-08	-26.2875939849624
354	chr10	1850281	1850281	+	1.19360077377451e-12	8.324548196392151e-10	-26.2854835453261
2795	chr5	447356	447356	+	1.11022302462516e-16	1.37132955216678e-13	-26.2673708570577
1002	chr13	50257973	50257973	+	5.8498341060087e-08	1.65418392540742e-05	-26.2617725187153
1158	chr14	99504958	99504958	+	3.3592018056083398e-12	2.18336965699083e-09	-26.2592754255784
3068	chr6	32449961	32449961	+	5.13134534863013e-10	2.28801447865713e-07	-26.2459508454932
3478	chr7	133997560	133997560	+	2.57559502614413e-08	7.98366397311616e-06	-26.2404092071611
2792	chr5	420517	420517	+	9.01334562541933e-12	5.45038359541044e-09	-26.2358301047496
889	chr12	109696837	109696837	+	8.18123346846278e-13	5.85604715661286e-10	-26.2281378600823
3182	chr6	164057159	164057159	+	1.3877787807814501e-14	1.3095290668667798e-11	-26.2278890185867
1034	chr13	112574260	112574260	+	1.25455201782643e-14	1.1899539939267099e-11	-26.2156121287094
3047	chr6	29973925	29973925	+	9.30877375182604e-10	3.95045576875697e-07	-26.2033462033462
3143	chr6	116867869	116867869	+	5.84475516063332e-06	0.0008445744938931	-26.1827227498869
1087	chr13	114748384	114748384	+	6.16059314673123e-10	2.7063238247457e-07	-26.1746031746032
600	chr11	658049	658049	+	1.83990349622576e-08	5.89879984558424e-06	-26.1694058154235
679	chr11	32055284	32055284	+	2.27745160508164e-08	7.14426056652655e-06	-26.1649599110899
3649	chr8	97772615	97772615	+	3.08452798414294e-07	7.08627874952475e-05	-26.1642525764068
2489	chr3	14347583	14347583	+	1.47366752134559e-09	5.99495762742117e-07	-26.1529051987768
3027	chr6	25882500	25882500	+	2.77555756156289e-15	2.8861760030944397e-12	-26.1522299684844
2885	chr5	58081030	58081030	+	2.2204460492503099e-16	2.6476607245991e-13	-26.1518661518661
144	chr1	65089765	65089765	+	6.4787468723182e-09	2.30854708893033e-06	-26.151618847065
1496	chr17	171134	171134	+	7.771561172376101e-16	8.70959707528981e-13	-26.1461004440553
2508	chr3	31846250	31846250	+	3.26456742139047e-05	0.003315980935997	-26.1437908496732
3681	chr8	141275282	141275282	+	3.53454071566617e-08	1.05612736877161e-05	-26.133680897108
3654	chr8	109262049	109262049	+	3.43169936911636e-13	2.61979362921363e-10	-26.126660341556
937	chr12	131030238	131030238	+	1.45807688367583e-07	3.6975062557264e-05	-26.1240863337681
1268	chr15	80992164	80992164	+	9.278891544006742e-09	3.19767207074654e-06	-26.1192407997682
255	chr1	205238530	205238530	+	6.6101568663157195e-12	4.09534493328602e-09	-26.1048509550068
3332	chr7	1798593	1798593	+	1.11022302462516e-16	1.37132955216678e-13	-26.1032912845533
973	chr13	25715365	25715365	+	3.3306690738754704e-15	3.4148700515940098e-12	-26.1018369770203
1924	chr2	9581741	9581741	+	4.1178949139464294e-11	2.2413654108201e-08	-26.088602801969
2529	chr3	58071600	58071600	+	1.2674317151351002e-10	6.32873404005713e-08	-26.0880520432472
3438	chr7	73304672	73304672	+	5.00071278575209e-06	0.000743538538907	-26.0869565217391
2726	chr4	48484887	48484887	+	3.4243825552948705e-09	1.29587800282278e-06	-26.0867579908676
1330	chr16	10281150	10281150	+	6.60320687018157e-11	3.45900060596688e-08	-26.0840263837109
3137	chr6	103780390	103780390	+	8.291129560689111e-09	2.88960139190624e-06	-26.0813296096996
2591	chr3	178471088	178471088	+	9.570122472268851e-14	7.91286213401987e-11	-26.0762385762386
2782	chr4	187581093	187581093	+	7.0710104438376196e-12	4.34772873863212e-09	-26.069972826087
1068	chr13	113731901	113731901	+	1.8318679906315102e-14	1.69845422052824e-11	-26.0631260631261
2005	chr2	100824103	100824103	+	5.56110713034741e-13	4.10903442123361e-10	-26.0615545122587
3304	chr7	1106011	1106011	+	6.42104458492554e-09	2.28993822237268e-06	-26.0527510212315
361	chr10	2543797	2543797	+	2.19824158875781e-14	2.01389662616923e-11	-26.0512850673411
2324	chr21	47423506	47423506	+	1.11022302462516e-15	1.21901677639141e-12	-26.0357959225224
3553	chr8	1008102	1008102	+	1.1586176462685699e-11	6.88104253623306e-09	-26.035144054946
2257	chr20	62387416	62387416	+	6.10622663543836e-15	6.04456644112214e-12	-26.0308833678399
1279	chr15	92614470	92614470	+	1.19304566226219e-12	8.323870327564851e-10	-26.0236564261332
1103	chr13	114900119	114900119	+	1.1760538098926101e-09	4.88544931473758e-07	-26.0122125646386
2430	chr22	45571446	45571446	+	3.77435194209852e-10	1.72352091044148e-07	-26.0109022862257
3729	chr9	12793817	12793817	+	2.57258316205267e-07	6.04834133285199e-05	-26.0105391684339
546	chr10	133572083	133572083	+	1.5561478805548e-07	3.91229742202369e-05	-26.0071090047393
2279	chr21	43236480	43236480	+	7.98250354705488e-14	6.69092154348538e-11	-26.0035860787905
1958	chr2	39752158	39752158	+	9.97322421555369e-05	0.007696994719315	-26.0022723583834
2229	chr20	57413371	57413371	+	1.6561840787687701e-10	8.0919084078517e-08	-26.000492247108
1762	chr19	1806462	1806462	+	2.65343302885412e-14	2.3993648036800398e-11	-25.9968102073365
1526	chr17	4145773	4145773	+	1.12457820833356e-11	6.6938265616793e-09	-25.9856818578662
156	chr1	94082916	94082916	+	2.2204460492503099e-16	2.6476607245991e-13	-25.9800484297722
2491	chr3	14813824	14813824	+	1.07645611415741e-05	0.0013848637703229	-25.974025974026
1617	chr17	74942260	74942260	+	8.05960409522299e-10	3.46054510922736e-07	-25.9711007224819
3616	chr8	28198715	28198715	+	8.10351785673902e-13	5.80467887309609e-10	-25.9705326173791
2128	chr2	240609875	240609875	+	5.73197045383722e-12	3.59387368117102e-09	-25.9679572763685
3132	chr6	89685297	89685297	+	3.17796012949678e-07	7.27636131953037e-05	-25.963149078727
1332	chr16	10647275	10647275	+	7.47253355859456e-08	2.05872875891243e-05	-25.9541644373105
2169	chr2	242913650	242913650	+	4.83402207152039e-12	3.0630308188217204e-09	-25.953660056191
1399	chr16	83386796	83386796	+	0.0001092458711567	0.008229620340392	-25.946585530764
142	chr1	62499140	62499140	+	9.254708110972839e-11	4.72942179303978e-08	-25.9358227703551
2026	chr2	113956370	113956370	+	6.065015156764279e-11	3.20056761211107e-08	-25.9277914332917
2609	chr3	196048411	196048411	+	2.00653171855691e-08	6.37573448010334e-06	-25.9231134314191
1722	chr18	74574323	74574323	+	2.0799384436998002e-10	9.99050067554836e-08	-25.9184768034326
1537	chr17	16337287	16337287	+	3.9968028886505604e-14	3.5078725113074896e-11	-25.9145184689209
718	chr11	69461731	69461731	+	1.30007116183606e-13	1.05292110139394e-10	-25.9116087914706
3052	chr6	30314115	30314115	+	4.88498130835069e-15	4.89694783143735e-12	-25.9097432217723
1352	chr16	28276241	28276241	+	2.2204460492503099e-16	2.6476607245991e-13	-25.908929836995
3057	chr6	31347549	31347549	+	1.42904243993769e-10	7.06588934623414e-08	-25.9088613986367
2870	chr5	35954143	35954143	+	6.10790501509584e-07	0.0001275706608958	-25.9082892416226
274	chr1	222987443	222987443	+	3.34177130412172e-14	2.9676861682367594e-11	-25.9081305799768
461	chr10	72118430	72118430	+	3.56936702416988e-13	2.71779996479369e-10	-25.9037095501184
2449	chr22	48896579	48896579	+	1.65635283266852e-11	9.610822416772092e-09	-25.9002966937303
2847	chr5	10229973	10229973	+	1.11022302462516e-16	1.37132955216678e-13	-25.8961428376721
2887	chr5	65472989	65472989	+	3.8576142280533096e-11	2.11147773617123e-08	-25.8955512572534
1269	chr15	84948335	84948335	+	2.40278705820884e-08	7.49804485548569e-06	-25.891198584697
1007	chr13	69557960	69557960	+	3.28070903776734e-13	2.50648786954062e-10	-25.8803592611422
3678	chr8	136693328	136693328	+	1.8257870770810301e-09	7.30252576747474e-07	-25.8736559139785
1300	chr16	1100505	1100505	+	1.27675647831893e-14	1.2098386222297798e-11	-25.8659170287077
2965	chr5	172347439	172347439	+	1.15394139799108e-08	3.88472877491276e-06	-25.8503401360544
3531	chr7	157921424	157921424	+	1.30862987113289e-10	6.515650861347e-08	-25.8424781819753
831	chr12	10163379	10163379	+	2.7072788455484398e-12	1.78501700554284e-09	-25.8385655297245
3195	chr6	167619070	167619070	+	1.50990331349021e-14	1.4165451761311399e-11	-25.8324382384533
2756	chr4	129522867	129522867	+	7.86259946039536e-13	5.64038972780743e-10	-25.8280432610357
323	chr1	247253414	247253414	+	6.628031457012181e-14	5.6216283661524894e-11	-25.8252264340825
3367	chr7	4990973	4990973	+	4.00790511889682e-13	3.03120541478159e-10	-25.8165605095541
3609	chr8	23340737	23340737	+	4.3642294889068e-08	1.27614750605737e-05	-25.8148148148148
13	chr1	1871336	1871336	+	1.27027388607814e-10	6.34086084036886e-08	-25.8073784622457
815	chr12	2075651	2075651	+	1.6697865312664797e-11	9.686849264984281e-09	-25.8014601721696
3290	chr7	1001973	1001973	+	1.49880108324396e-14	1.4065803743624698e-11	-25.7932416953035
105	chr1	36579981	36579981	+	2.9976021664879203e-15	3.0928897089296098e-12	-25.7832080200501
3055	chr6	31237563	31237563	+	3.16993098437024e-10	1.46883535692292e-07	-25.7777777777778
3535	chr7	158217902	158217902	+	6.62618720148611e-06	0.0009359990969786	-25.7751937984496
746	chr11	94926266	94926266	+	1.78967951569575e-13	1.42113207355277e-10	-25.7744246750479
3044	chr6	29911836	29911836	+	1.79277948042511e-09	7.18622281441871e-07	-25.7733958299661
3789	chr9	132553024	132553024	+	2.97098125545681e-07	6.85772534605204e-05	-25.7685009487666
2288	chr21	43960219	43960219	+	4.72944093465877e-06	0.0007108385746694	-25.7669337961309
2853	chr5	11384022	11384022	+	2.63303058245512e-08	8.14100155858998e-06	-25.763965963744
1104	chr13	114900122	114900122	+	6.636007299221091e-09	2.35912481815772e-06	-25.757283116047
3849	chrX	152872060	152872060	+	2.88657986402541e-15	2.9920535754927597e-12	-25.7415107415107
3109	chr6	36988364	36988364	+	1.60409019400731e-10	7.85969423334358e-08	-25.7354890007951
3382	chr7	26052766	26052766	+	3.42614825399323e-12	2.2229325016032e-09	-25.7333333333333
386	chr10	5645984	5645984	+	5.84998716135487e-12	3.6608090511335902e-09	-25.7159507159507
2940	chr5	141928867	141928867	+	2.92708246529827e-07	6.76600359619478e-05	-25.7142857142857
2306	chr21	45360861	45360861	+	5.26134691369862e-13	3.90253311567676e-10	-25.7121071837046
3512	chr7	155679442	155679442	+	2.9976021664879203e-15	3.0928897089296098e-12	-25.7110424862868
2106	chr2	236761396	236761396	+	1.79958381529843e-10	8.7400052493389e-08	-25.7109644206418
1197	chr14	106512604	106512604	+	1.22557907156207e-08	4.10089064465296e-06	-25.7089352594971
2530	chr3	58071644	58071644	+	2.01034023872282e-08	6.38714243874918e-06	-25.708649912332
1203	chr15	20788226	20788226	+	3.2196467714129504e-15	3.30799549028827e-12	-25.6880733944954
148	chr1	70995665	70995665	+	1.9200401268904e-08	6.12952919986358e-06	-25.6874580818243
3289	chr7	971105	971105	+	1.88926652100463e-12	1.2785102361116301e-09	-25.6769788477106
3202	chr6	168627447	168627447	+	2.72331268647008e-10	1.27746439611377e-07	-25.675768543547
2358	chr22	20378487	20378487	+	9.00782078150364e-07	0.0001773532478344	-25.6718124642653
3420	chr7	51293912	51293912	+	7.7937656328686e-13	5.59649854178242e-10	-25.6680716904835
2152	chr2	242605421	242605421	+	2.1538326677728e-14	1.9738298263768298e-11	-25.6636633336996
1644	chr17	79283989	79283989	+	1.87072579649339e-13	1.48146828411503e-10	-25.6635111940578
1308	chr16	1560111	1560111	+	1.11022302462516e-15	1.21901677639141e-12	-25.661988724961
1732	chr18	77256972	77256972	+	3.50316380792748e-07	7.92116891073612e-05	-25.659229208925
3685	chr8	142262080	142262080	+	2.9976021664879203e-15	3.0928897089296098e-12	-25.6586070010826
1335	chr16	11264611	11264611	+	7.793243828047029e-11	4.03542818586092e-08	-25.6471306471306
3624	chr8	41292579	41292579	+	6.296463350707879e-11	3.31468769129949e-08	-25.6455455901439
3605	chr8	22084503	22084503	+	1.11022302462516e-16	1.37132955216678e-13	-25.6447940050711
3519	chr7	157209551	157209551	+	2.87236900931021e-11	1.60123400685828e-08	-25.6434376881397
1783	chr19	5784313	5784313	+	2.85882428840978e-13	2.21013216668137e-10	-25.6432055749129
453	chr10	64671275	64671275	+	6.04516436908398e-13	4.4389111708801703e-10	-25.6405707479028
3436	chr7	70923371	70923371	+	4.4579895330798495e-12	2.83828296428465e-09	-25.6382400869093
955	chr12	132946241	132946241	+	1.3845034008142e-09	5.67722166686678e-07	-25.635039353567
876	chr12	86230937	86230937	+	1.22600929408634e-10	6.13245771730442e-08	-25.6258234519104
1717	chr18	72916309	72916309	+	6.54146736778216e-11	3.42788651617279e-08	-25.6247069069471
14	chr1	1873696	1873696	+	8.47100167788994e-14	7.070001762779249e-11	-25.6220297160894
3650	chr8	101907062	101907062	+	6.12954131895549e-13	4.496355145111e-10	-25.6186807896004
3717	chr8	144995494	144995494	+	1.0103029524088901e-14	9.708697981167879e-12	-25.6183797857861
3810	chr9	136898097	136898097	+	1.10000897279861e-12	7.70598959961583e-10	-25.6107660455487
494	chr10	108751913	108751913	+	5.00767156630388e-08	1.4402595719675e-05	-25.6098803157627
384	chr10	5090076	5090076	+	1.51375176837831e-07	3.81949259525997e-05	-25.609756097561
3097	chr6	33708249	33708249	+	9.75606051500932e-09	3.34481364178287e-06	-25.6083943011167
3495	chr7	143825597	143825597	+	1.32243420869482e-06	0.0002455356333185	-25.6036183091886
1592	chr17	64210527	64210527	+	1.0053069487980799e-12	7.10379009073834e-10	-25.5927927927928
1867	chr19	55824585	55824585	+	1.45439216225896e-14	1.3675354816513e-11	-25.5922693266833
2564	chr3	131756545	131756545	+	1.96213045811078e-10	9.46971649390373e-08	-25.5845926469072
2791	chr5	418839	418839	+	3.78275377688198e-09	1.41799987542191e-06	-25.5840754321634
205	chr1	151115645	151115645	+	1.28556165712723e-08	4.28201131954274e-06	-25.5803360550644
3459	chr7	100285888	100285888	+	1.2498937052019e-06	0.0002342520429921	-25.5717894449375
649	chr11	5989222	5989222	+	1.49880108324396e-14	1.4065803743624698e-11	-25.5690607734807
99	chr1	28282206	28282206	+	5.2180482157382405e-15	5.2076380056925494e-12	-25.5634553857092
3018	chr6	21215421	21215421	+	3.0850877408283797e-12	2.0141524265060503e-09	-25.5488215488215
2203	chr20	37438823	37438823	+	2.6308732969937397e-11	1.47902619270318e-08	-25.5483646787995
2981	chr5	178859586	178859586	+	2.33846275676797e-12	1.56047755330484e-09	-25.5469362851913
190	chr1	146549864	146549864	+	2.49563247844975e-08	7.76376391459687e-06	-25.5458399576047
1062	chr13	113639174	113639174	+	1.24344978758018e-14	1.1805714711788e-11	-25.5432211101001
1866	chr19	55598992	55598992	+	2.6640911698905297e-12	1.75772983763603e-09	-25.5383920646538
1982	chr2	71186381	71186381	+	2.2204460492503103e-15	2.3481602523188297e-12	-25.5382071421757
2084	chr2	208995098	208995098	+	7.69203811756825e-10	3.3143957492828e-07	-25.5364806866953
1283	chr15	99206834	99206834	+	9.01501095995627e-14	7.47923993131691e-11	-25.5357142857143
1789	chr19	7166387	7166387	+	2.50024212999911e-07	5.89864135488618e-05	-25.5345806882726
3028	chr6	25882511	25882511	+	7.97140131680862e-14	6.683530175133709e-11	-25.527047079455
2569	chr3	136628249	136628249	+	1.07597530857317e-05	0.0013843060746029	-25.5236329935125
1444	chr16	88052984	88052984	+	1.11022302462516e-16	1.37132955216678e-13	-25.5219613618643
3405	chr7	45125774	45125774	+	8.27003875381038e-08	2.2511049684086e-05	-25.5210667861945
1741	chr19	422938	422938	+	1.1401996569127e-08	3.84377401843569e-06	-25.5188679245283
1277	chr15	90771703	90771703	+	1.31783473023006e-13	1.06612740245553e-10	-25.5180498569114
3598	chr8	11734874	11734874	+	5.0011439434172196e-11	2.67680630655332e-08	-25.517341882833
1042	chr13	112894618	112894618	+	3.38002786870462e-08	1.01597025081269e-05	-25.5028561859219
2984	chr5	179563675	179563675	+	1.77140705437395e-08	5.69855290059188e-06	-25.5013550135501
66	chr1	17253128	17253128	+	8.56169632967863e-08	2.32099429174591e-05	-25.4997518162538
977	chr13	29172708	29172708	+	8.959499808725011e-14	7.439513408711859e-11	-25.4918866159665
654	chr11	8080865	8080865	+	1.1718515047221e-11	6.95399294206916e-09	-25.487704241624
2985	chr5	179622204	179622204	+	5.71320768472106e-13	4.21419354246071e-10	-25.4770075497598
3021	chr6	25181447	25181447	+	2.0697887848086797e-12	1.3900650864456301e-09	-25.4729985609331
2109	chr2	237124209	237124209	+	4.25237622891927e-12	2.7162394721087303e-09	-25.4728849517996
2068	chr2	173867808	173867808	+	2.26563212635256e-11	1.28879873295604e-08	-25.4593868972954
2936	chr5	138266545	138266545	+	1.93301953332892e-08	6.16692778219004e-06	-25.4578754578755
51	chr1	11137778	11137778	+	4.28834745491713e-12	2.73742370076448e-09	-25.456204379562
1594	chr17	64651230	64651230	+	1.7828627463245497e-11	1.02877633556068e-08	-25.4514779322446
2902	chr5	94879974	94879974	+	8.80406858527749e-14	7.32708478186262e-11	-25.4440416025782
1338	chr16	16047448	16047448	+	3.4972802431809694e-11	1.92613749128391e-08	-25.4244629244629
1296	chr16	846652	846652	+	4.88165063927681e-13	3.63564384852084e-10	-25.4229691876751
2253	chr20	62005457	62005457	+	8.626874214989752e-09	2.99519846817276e-06	-25.4129129129129
816	chr12	2552648	2552648	+	3.4246442348617705e-09	1.29587800282278e-06	-25.4115495165926
1606	chr17	72338764	72338764	+	9.11327311126087e-06	0.0012124583561604	-25.3782568762991
3298	chr7	1072563	1072563	+	8.25530654946505e-09	2.87745917362855e-06	-25.3769836659774
1879	chr19	58549813	58549813	+	7.76799649715443e-07	0.0001565126157628	-25.3743104806935
393	chr10	6178268	6178268	+	7.894567222166421e-10	3.39566252877699e-07	-25.3725066089882
648	chr11	5646904	5646904	+	1.34225963677181e-13	1.08528703185451e-10	-25.3689370485036
1522	chr17	3433457	3433457	+	1.33226762955019e-15	1.4530062060751799e-12	-25.3665838805158
1174	chr14	101716809	101716809	+	1.13459618367173e-08	3.82726821711553e-06	-25.3634085213033
1185	chr14	104845885	104845885	+	2.74459532878524e-08	8.44137044876337e-06	-25.3623188405797
362	chr10	2543841	2543841	+	7.53841433720481e-14	6.34595374702941e-11	-25.3601009745343
2989	chr5	180467481	180467481	+	1.9693136010801e-12	1.3283789921557402e-09	-25.3588516746411
904	chr12	120903935	120903935	+	1.4095391520641e-12	9.7460391272493e-10	-25.358640476716
1820	chr19	36226468	36226468	+	1.11022302462516e-16	1.37132955216678e-13	-25.3586242654684
2280	chr21	43275725	43275725	+	2.00216466075265e-05	0.0022659583114102	-25.3551136363636
74	chr1	20592887	20592887	+	1.54321000422897e-14	1.4459381350065699e-11	-25.3521815691646
2580	chr3	157307421	157307421	+	5.59865889204758e-08	1.58960981668727e-05	-25.3509185115403
2967	chr5	175322494	175322494	+	2.70813260705438e-10	1.27156670495755e-07	-25.3505805876648
3365	chr7	4243210	4243210	+	4.7504151723387605e-09	1.7384229549368e-06	-25.3453658953851
1662	chr17	80535367	80535367	+	2.07833750209829e-12	1.3954860980733302e-09	-25.3415412303665
1742	chr19	594218	594218	+	1.07504804391922e-07	2.83095070203751e-05	-25.3412931829156
2983	chr5	179518159	179518159	+	1.05911540648762e-08	3.59402890454954e-06	-25.3386429198545
885	chr12	106153038	106153038	+	1.60982338570648e-13	1.28669368428585e-10	-25.3381972944216
1755	chr19	1039444	1039444	+	4.88498130835069e-15	4.89694783143735e-12	-25.3323627973411
2800	chr5	504298	504298	+	7.0052852407798095e-12	4.3114864715330806e-09	-25.3311082856537
3484	chr7	138481803	138481803	+	1.16351372980716e-13	9.480970022609538e-11	-25.3255955192658
3566	chr8	1568775	1568775	+	8.62865334738672e-13	6.153726224468401e-10	-25.3248435938252
2871	chr5	36600633	36600633	+	7.0745891397106e-05	0.0059709584280447	-25.3246753246753
2238	chr20	60500448	60500448	+	3.951521206913e-07	8.79028883608308e-05	-25.3165512901196
3165	chr6	143753343	143753343	+	9.83736987425488e-08	2.61973291075619e-05	-25.3147285225137
3053	chr6	31087240	31087240	+	1.29291022332723e-11	7.630596924592021e-09	-25.3145292207792
2004	chr2	100624158	100624158	+	9.815675716673411e-09	3.3616742570633e-06	-25.3073062934487
3236	chr6	170597276	170597276	+	2.1286616913585e-10	1.0207775433066e-07	-25.3069118873344
3241	chr6	170919132	170919132	+	3.33066907387547e-16	3.90153688040404e-13	-25.3054678749618
3846	chrX	152073690	152073690	+	7.49926787335653e-11	3.89215799541184e-08	-25.3010797342193
711	chr11	65552154	65552154	+	9.54006740272462e-09	3.27879650389427e-06	-25.3004299109712
2787	chr5	171298	171298	+	4.37427871702312e-14	3.802673218594e-11	-25.3001876172608
3557	chr8	1183435	1183435	+	2.96651592179842e-13	2.27953576225579e-10	-25.2844893788516
3637	chr8	69387317	69387317	+	3.6709622830422e-07	8.25085512471542e-05	-25.2830188679245
1731	chr18	77125698	77125698	+	2.2204460492503099e-16	2.6476607245991e-13	-25.2694422623724
2653	chr4	2909193	2909193	+	1.11022302462516e-16	1.37132955216678e-13	-25.2667362256403
1815	chr19	33906883	33906883	+	3.58602036953926e-14	3.17016177049499e-11	-25.2605474835469
786	chr11	133715152	133715152	+	9.7339506011096e-08	2.59431686500268e-05	-25.2380952380952
2911	chr5	114847794	114847794	+	5.18895678647269e-08	1.48728266540084e-05	-25.2374491180461
3271	chr7	872130	872130	+	3.5603742176704097e-12	2.3049095042165e-09	-25.2236462043243
197	chr1	146550055	146550055	+	1.2170264795940998e-12	8.481073343884e-10	-25.2177635098983
2894	chr5	75464429	75464429	+	8.108778093429691e-10	3.47979509864931e-07	-25.2065826330532
2793	chr5	435105	435105	+	1.12132525487141e-14	1.06878387823255e-11	-25.2049781644313
1047	chr13	113095946	113095946	+	5.7065463465733e-14	4.879665021825579e-11	-25.2032520325203
450	chr10	52508516	52508516	+	2.71588745937024e-08	8.36360300003092e-06	-25.2005948675382
3322	chr7	1225254	1225254	+	2.37167830818841e-07	5.64356166150136e-05	-25.1999127653388
751	chr11	107799045	107799045	+	3.63369476874542e-06	0.0005726994468156	-25.1939111886756
319	chr1	246383216	246383216	+	6.00650871818154e-07	0.0001257760752968	-25.1904761904762
1696	chr18	34837596	34837596	+	1.756372824957e-13	1.39657915754605e-10	-25.1858645655285
2153	chr2	242611050	242611050	+	1.69391167759159e-11	9.809302551625661e-09	-25.1760329480537
20	chr1	3026100	3026100	+	9.65147961551338e-11	4.9124512682863e-08	-25.1743666169896
2315	chr21	46414079	46414079	+	5.781375378433039e-12	3.62229178264696e-09	-25.1710804594427
3555	chr8	1136773	1136773	+	2.2204460492503099e-16	2.6476607245991e-13	-25.1707044055329
604	chr11	783917	783917	+	4.37052061208476e-10	1.97388505525114e-07	-25.1692201903861
2673	chr4	6694984	6694984	+	8.74855743404623e-14	7.28917884612039e-11	-25.1630679262258
2209	chr20	44806874	44806874	+	4.94826402075432e-13	3.68057078377818e-10	-25.1561827155586
1102	chr13	114900059	114900059	+	6.54587495318992e-13	4.77304150629303e-10	-25.1512300040328
2411	chr22	40417780	40417780	+	7.70272734484934e-13	5.53792133209301e-10	-25.1392715029079
2116	chr2	239018462	239018462	+	2.2444268665822197e-12	1.5008068784009102e-09	-25.1322033898305
2566	chr3	133786839	133786839	+	1.60982338570648e-14	1.5049794179458397e-11	-25.1286764705882
3222	chr6	170532795	170532795	+	2.4170998536021696e-11	1.36857547504568e-08	-25.1258491764821
1177	chr14	102981595	102981595	+	1.04471986617227e-13	8.579869790197009e-11	-25.123714396479
1690	chr18	14146161	14146161	+	1.17974074953509e-10	5.91619372364532e-08	-25.1216446354716
1419	chr16	85520901	85520901	+	5.35793631684101e-13	3.97015150064194e-10	-25.1173173743707
829	chr12	8995965	8995965	+	8.037946530592421e-09	2.80671141107727e-06	-25.1131221719457
221	chr1	166634216	166634216	+	2.98152925681805e-08	9.09265603035625e-06	-25.1066611615745
3454	chr7	97853183	97853183	+	3.03954639235826e-11	1.68865964190878e-08	-25.1028806584362
897	chr12	117363165	117363165	+	8.88376612384612e-07	0.0001753118228283	-25.100155342981
1272	chr15	89440192	89440192	+	1.11022302462516e-16	1.37132955216678e-13	-25.0886983349213
1993	chr2	96825362	96825362	+	2.34208634708466e-08	7.3258121240229e-06	-25.0860091743119
748	chr11	100760935	100760935	+	4.3520742565306105e-14	3.78787164176257e-11	-25.083804233311
1041	chr13	112669366	112669366	+	9.992007221626409e-16	1.1004184185829099e-12	-25.0775623268698
3334	chr7	1819179	1819179	+	1.05804254246777e-13	8.67467571520368e-11	-25.0737495119517
3388	chr7	30737132	30737132	+	6.70574706873595e-14	5.6842483901685694e-11	-25.0640862405568
2228	chr20	57408426	57408426	+	2.27041252687243e-07	5.42997045681619e-05	-25.0624589086128
3310	chr7	1135775	1135775	+	6.9983685513364e-11	3.65096807876359e-08	-25.0600347435111
1687	chr18	12273893	12273893	+	9.97806282043712e-11	5.06633940041676e-08	-25.0586854460094
1497	chr17	171197	171197	+	2.88657986402541e-14	2.5925620760024697e-11	-25.056224432424
825	chr12	6589171	6589171	+	2.35095704015365e-08	7.35120135219683e-06	-25.053480335692
3336	chr7	2137611	2137611	+	1.44131695467564e-09	5.88298283316643e-07	-25.0527122867548
2357	chr22	20378485	20378485	+	2.35595137954014e-06	0.0003987891718809	-25.0435131878431
2834	chr5	6722158	6722158	+	2.87299517509609e-10	1.3418701354662e-07	-25.0424296090151
3145	chr6	121801376	121801376	+	2.1449508835758e-13	1.6867640951218901e-10	-25.0422154677474
235	chr1	182030692	182030692	+	4.5653480995611094e-12	2.90347659893949e-09	-25.0408113518345
470	chr10	79194347	79194347	+	4.66658045539248e-10	2.09756020659819e-07	-25.0403442711135
2827	chr5	5327381	5327381	+	6.66133814775094e-16	7.50561349807416e-13	-25.0400414546825
2662	chr4	3480439	3480439	+	6.66133814775094e-16	7.50561349807416e-13	-25.0364402380097
771	chr11	125221156	125221156	+	4.312439072506891e-09	1.59328862932519e-06	-25.0327575938058
1807	chr19	18307108	18307108	+	5.19584375524573e-14	4.4703972474298394e-11	-25.0184856196284
3266	chr7	817218	817218	+	1.5304091327550402e-09	6.20594168317597e-07	-25.0170316301703
653	chr11	7662732	7662732	+	1.67421632113474e-13	1.3330636738224e-10	-25.0102024799874
3199	chr6	168363958	168363958	+	3.07118760423108e-08	9.32913659640198e-06	-25.0093054418224
1384	chr16	70700363	70700363	+	4.5941028758989e-13	3.44163764367278e-10	-25.0032513212187
2165	chr2	242753263	242753263	+	2.68279600756927e-08	8.27388807008019e-06	-25.0015532774154
3631	chr8	57789060	57789060	+	2.78665929145383e-05	0.0029312619906835	25.0048446482785
1146	chr14	91681920	91681920	+	1.13242748511766e-14	1.07901442633174e-11	25.0068858095338
3823	chr9	139621167	139621167	+	1.11022302462516e-16	1.37132955216678e-13	25.0193498452012
735	chr11	72424516	72424516	+	7.475353669406099e-12	4.58670795076501e-09	25.0194099378882
1656	chr17	80303585	80303585	+	1.3877787807814501e-14	1.3095290668667798e-11	25.0202650892759
1290	chr15	101593640	101593640	+	9.803269307440131e-14	8.09419916230354e-11	25.0212254325506
317	chr1	246235421	246235421	+	9.490963570613079e-12	5.71793045687434e-09	25.0239719712336
1325	chr16	4684447	4684447	+	5.55111512312578e-16	6.337650622479709e-13	25.0254000508001
1405	chr16	84521371	84521371	+	1.80868489596531e-06	0.0003193245019237	25.0363430786626
1591	chr17	63634507	63634507	+	9.8509089774268e-11	5.00699021669629e-08	25.0457617572515
1653	chr17	80276492	80276492	+	3.82776719320965e-07	8.5551286386984e-05	25.0462962962963
2531	chr3	58558055	58558055	+	2.2070012484221002e-11	1.25862753983418e-08	25.0489390024274
243	chr1	200871237	200871237	+	1.87627691161651e-14	1.7330393650096098e-11	25.0544662309368
2873	chr5	38756717	38756717	+	5.05333475064873e-08	1.4521082428533e-05	25.0641025641026
1523	chr17	3800218	3800218	+	1.88348585616893e-08	6.02203143070874e-06	25.0769876819709
2361	chr22	20946403	20946403	+	3.69866217653225e-08	1.09965884427067e-05	25.0788821275637
997	chr13	50194346	50194346	+	1.68417720880498e-08	5.44307053035875e-06	25.0791483021913
82	chr1	22425642	22425642	+	1.88737914186277e-15	2.01634008960981e-12	25.0927593168549
281	chr1	226077131	226077131	+	2.39707143023793e-11	1.35802359595048e-08	25.0953255189945
1751	chr19	876604	876604	+	3.67871514361795e-08	1.09470450617326e-05	25.1018170426065
2877	chr5	40911592	40911592	+	1.48228641583259e-08	4.86254843521121e-06	25.1082251082251
391	chr10	5881739	5881739	+	1.43149592179981e-09	5.84617412817348e-07	25.1108116202456
2604	chr3	194325009	194325009	+	2.4207635895834298e-11	1.3703847355535e-08	25.1121438022396
385	chr10	5541183	5541183	+	3.33066907387547e-16	3.90153688040404e-13	25.1122072612541
2149	chr2	242530571	242530571	+	2.26663798841287e-10	1.07968809802089e-07	25.114403254137
2955	chr5	158086454	158086454	+	2.67050513591549e-07	6.24894047188987e-05	25.1173539394815
3703	chr8	144311160	144311160	+	4.86555240541975e-12	3.0816750703585905e-09	25.126913027249
2022	chr2	110275005	110275005	+	8.870681966755e-14	7.374133771469869e-11	25.1270999115827
2904	chr5	96079387	96079387	+	4.44089209850063e-16	5.12208073958707e-13	25.1278571793357
593	chr10	134926474	134926474	+	6.90558721316847e-14	5.845180153455849e-11	25.1380494650804
3469	chr7	112420072	112420072	+	1.07049555735372e-05	0.0013791965300533	25.1515151515151
1400	chr16	84026599	84026599	+	2.8879676428061897e-11	1.60933690597075e-08	25.1538416456661
2874	chr5	38772321	38772321	+	2.64185340270728e-11	1.48434346684771e-08	25.1694047677083
2655	chr4	2959765	2959765	+	9.6878694622049e-08	2.58396519216675e-05	25.1710654936461
367	chr10	2547014	2547014	+	1.2891909761947298e-11	7.61018131568952e-09	25.1724894938217
312	chr1	245679609	245679609	+	9.992007221626409e-16	1.1004184185829099e-12	25.1737052821904
1852	chr19	49244219	49244219	+	6.46935436332541e-08	1.80960757088074e-05	25.1764079350286
981	chr13	32610508	32610508	+	6.47156703781349e-08	1.81005347138631e-05	25.1818783068783
614	chr11	1507794	1507794	+	1.3483769656375e-11	7.93235623940192e-09	25.1852555576667
1357	chr16	29266471	29266471	+	1.11022302462516e-16	1.37132955216678e-13	25.1883918550585
81	chr1	22211216	22211216	+	3.33066907387547e-16	3.90153688040404e-13	25.2034841636238
3802	chr9	136522927	136522927	+	6.73239242132695e-13	4.89440838655402e-10	25.2060923661549
3656	chr8	116663921	116663921	+	2.9171607351941e-09	1.11992278620661e-06	25.2087503574492
2582	chr3	161091088	161091088	+	3.51504519324752e-06	0.0005572106511467	25.2136752136752
3488	chr7	139992333	139992333	+	5.18252107895023e-12	3.27039829243043e-09	25.2214452214452
2332	chr21	47639492	47639492	+	1.48021789270203e-08	4.85687084234503e-06	25.2252252252252
851	chr12	32945834	32945834	+	2.5239401424404e-07	5.94735772628168e-05	25.2260134149898
3762	chr9	100070350	100070350	+	9.21173364254457e-08	2.47656371028241e-05	25.2306685570946
3020	chr6	25107287	25107287	+	4.05266786795977e-09	1.5072084764078e-06	25.2319707663096
2138	chr2	241080351	241080351	+	5.61772850460329e-14	4.80652611928669e-11	25.2414837914199
2995	chr6	2579488	2579488	+	4.0726644279232e-11	2.21881013539765e-08	25.2430974519128
3428	chr7	63209463	63209463	+	5.10702591327572e-15	5.10903475616487e-12	25.2445808555534
3440	chr7	75595963	75595963	+	4.38649117029399e-13	3.29877500143596e-10	25.2465192465192
3153	chr6	134374405	134374405	+	1.08539877996527e-06	0.0002079513017764	25.2509081953082
2301	chr21	44877573	44877573	+	1.6918577649960298e-11	9.80517037408327e-09	25.2528970364742
1106	chr14	22361282	22361282	+	4.37276739262416e-08	1.27800089126006e-05	25.2606598194834
2534	chr3	66002989	66002989	+	1.38874689525892e-10	6.88409704397797e-08	25.2655835025777
413	chr10	16251161	16251161	+	1.14895919445246e-08	3.86973707821372e-06	25.2657004830918
3441	chr7	75803132	75803132	+	5.295763827462e-14	4.5483422988923896e-11	25.2665245202559
1153	chr14	95027721	95027721	+	1.1035028446571001e-10	5.55004374493644e-08	25.2675318761384
2785	chr4	190474995	190474995	+	3.5638159090467497e-12	2.30662726524148e-09	25.2675799392453
445	chr10	47664137	47664137	+	5.69544411632705e-14	4.87159512060693e-11	25.2816901408451
1154	chr14	95046686	95046686	+	9.4933363148364e-06	0.0012523750613517	25.2898550724638
2754	chr4	122672255	122672255	+	1.46506441311978e-07	3.71361662471975e-05	25.290636229127
1	chr1	754502	754502	+	2.7885471709510097e-12	1.83281869391375e-09	25.2960231042423
3513	chr7	155744483	155744483	+	4.92828000631107e-13	3.66757101439976e-10	25.2996994268139
2913	chr5	122501774	122501774	+	6.76680933509033e-13	4.91576534927048e-10	25.3103987695786
2035	chr2	121497271	121497271	+	2.2148283207457098e-11	1.26210732207171e-08	25.3119269353853
606	chr11	1316236	1316236	+	4.65281879691304e-09	1.70654904242771e-06	25.3126405757985
2888	chr5	72020508	72020508	+	5.6443738571943e-13	4.16657104969184e-10	25.3127606338615
33	chr1	4725584	4725584	+	1.35635946918455e-12	9.40054950399531e-10	25.3171538885825
3541	chr8	232850	232850	+	1.92651963604185e-07	4.71581603131399e-05	25.3205655104389
1080	chr13	114302621	114302621	+	1.6769474697753097e-11	9.72260898232942e-09	25.3482972136223
1267	chr15	80324559	80324559	+	2.40235193738059e-07	5.70356465066125e-05	25.353058239624
1585	chr17	55966003	55966003	+	4.74287276119867e-13	3.5394949546551903e-10	25.3575757575758
2497	chr3	16420793	16420793	+	2.53561505125788e-10	1.19786751134985e-07	25.3576418155157
2668	chr4	4784097	4784097	+	2.6301007520102e-05	0.0028042817191717	25.3663570691435
3696	chr8	143747271	143747271	+	8.85957973650875e-14	7.366997464757919e-11	25.3763440860215
3533	chr7	158107382	158107382	+	1.38944411531838e-12	9.61163748443853e-10	25.3783158269539
3774	chr9	117798837	117798837	+	8.25894908018654e-13	5.90734010165465e-10	25.3907900295733
2146	chr2	242056286	242056286	+	8.315244048873181e-10	3.56038277863593e-07	25.3946703257023
3147	chr6	125621179	125621179	+	9.46701769644065e-07	0.0001850350852548	25.3982605700508
796	chr12	276219	276219	+	5.84532422465145e-13	4.3018859829785003e-10	25.401004493788
2421	chr22	42855098	42855098	+	7.7380719276654e-08	2.12189704731559e-05	25.4031998971921
1622	chr17	76335155	76335155	+	2.77333711551364e-13	2.14744692069055e-10	25.4140146157473
439	chr10	39023733	39023733	+	3.5152207811250905e-09	1.32723422013966e-06	25.4248063807652
423	chr10	29747417	29747417	+	2.89768209427166e-13	2.23485873503081e-10	25.4252678338124
3699	chr8	144129474	144129474	+	4.0407566181954696e-11	2.20306729688499e-08	25.437688253012
3379	chr7	23338514	23338514	+	2.19429197034771e-09	8.61971895008655e-07	25.4409714990628
3814	chr9	137554679	137554679	+	4.70859310101046e-05	0.0043911311695972	25.443077893409
1759	chr19	1495277	1495277	+	1.51789691926751e-12	1.0439294397718701e-09	25.4469784629166
1156	chr14	95513280	95513280	+	4.80985255402189e-07	0.0001040156135873	25.4475308641975
1725	chr18	74722006	74722006	+	1.90982843579768e-05	0.0021861461953346	25.4584942084942
18	chr1	2981840	2981840	+	2.40627850978115e-10	1.14174366367953e-07	25.4658677559477
3516	chr7	156782557	156782557	+	6.75792755089333e-13	4.9105322545788e-10	25.4758132548713
615	chr11	1646095	1646095	+	5.9827698351000395e-12	3.73750751842592e-09	25.4785724460613
856	chr12	50305514	50305514	+	4.41026638542397e-08	1.28703534350336e-05	25.4829339143065
995	chr13	47337846	47337846	+	9.3636585152268e-09	3.22384686101671e-06	25.4859722008514
3697	chr8	143751841	143751841	+	7.549516567451061e-15	7.38089609815071e-12	25.4873719739292
879	chr12	97304412	97304412	+	6.52610743223647e-10	2.85403868219007e-07	25.4909090909091
60	chr1	15052886	15052886	+	3.8617664621654096e-11	2.11335515984353e-08	25.507451350148
3424	chr7	55412404	55412404	+	1.11022302462516e-16	1.37132955216678e-13	25.5172031833132
2809	chr5	1407115	1407115	+	3.07793439624504e-08	9.34866038244316e-06	25.523745619921
2625	chr4	947180	947180	+	2.2204460492503099e-16	2.6476607245991e-13	25.5285424316373
3559	chr8	1198616	1198616	+	1.4543921622589599e-13	1.16981045049446e-10	25.5367867867868
3710	chr8	144636462	144636462	+	4.4890757777693596e-12	2.85621037958395e-09	25.5369873690484
1512	chr17	1409886	1409886	+	9.992007221626409e-16	1.1004184185829099e-12	25.5381543645099
1286	chr15	100337389	100337389	+	2.37045345574671e-08	7.40662431661277e-06	25.5392434839225
1000	chr13	50194601	50194601	+	6.43929354282591e-15	6.354921521983799e-12	25.5395462277879
2527	chr3	55505023	55505023	+	2.88448739338421e-08	8.82259776019261e-06	25.5401465311005
451	chr10	61607887	61607887	+	3.0806859285803503e-09	1.17683430943728e-06	25.5411255411255
3578	chr8	2207548	2207548	+	7.036792704084861e-09	2.48677475401636e-06	25.5416389459374
3542	chr8	233121	233121	+	2.43097651342339e-07	5.76030711048752e-05	25.5453501722158
520	chr10	128825310	128825310	+	1.88939756062823e-08	6.03961295893901e-06	25.5465871205475
2783	chr4	187813486	187813486	+	8.76632100244024e-13	6.24277804403021e-10	25.5639875819248
3164	chr6	139802205	139802205	+	5.628579713423681e-09	2.03083496899742e-06	25.567305573915
861	chr12	56866962	56866962	+	4.05249611645786e-10	1.84076586799528e-07	25.5727351267614
1724	chr18	74680208	74680208	+	2.78836953526707e-11	1.55977614921632e-08	25.5754475703325
297	chr1	234450962	234450962	+	3.18098978568937e-06	0.0005125298715092	25.5791580081582
120	chr1	43476956	43476956	+	1.2314671504754e-09	5.100436339806e-07	25.581630998703
1336	chr16	11449535	11449535	+	1.1117662346293899e-11	6.622954751381771e-09	25.5903271692745
847	chr12	27600839	27600839	+	6.363798377151399e-13	4.65885216223776e-10	25.5981848184818
2442	chr22	47461894	47461894	+	1.28630439633071e-12	8.94042829202774e-10	25.620309588898
32	chr1	4577264	4577264	+	2.83106871279415e-14	2.5481800240424198e-11	25.6226900208902
1800	chr19	12376997	12376997	+	4.21263024463769e-12	2.6926147418403e-09	25.6234090960286
2703	chr4	10335524	10335524	+	2.66453525910038e-15	2.7835884690465697e-12	25.6445993031359
2237	chr20	60499824	60499824	+	1.7256969186973902e-09	6.93537835453319e-07	25.6446589410477
3450	chr7	90897229	90897229	+	2.72735690299841e-05	0.0028840188238501	25.6527955451878
2540	chr3	101714705	101714705	+	7.9890183368736e-07	0.0001601827488288	25.6560373265179
814	chr12	1459744	1459744	+	2.10690132007585e-10	1.01117114104623e-07	25.658635567993
1650	chr17	80110866	80110866	+	2.894000594722e-10	1.35038772425316e-07	25.6593406593407
1884	chr2	588782	588782	+	3.67316843608023e-10	1.67967554661394e-07	25.6618156618157
725	chr11	69921329	69921329	+	1.50170986756848e-11	8.7674164966081e-09	25.6756123286066
1147	chr14	91795029	91795029	+	1.11022302462516e-16	1.37132955216678e-13	25.6770131401617
3776	chr9	125391940	125391940	+	5.09818504066395e-05	0.0046687500195809	25.6774193548387
2924	chr5	131597005	131597005	+	8.34332603005805e-12	5.0798643391093405e-09	25.6793291851278
1303	chr16	1362187	1362187	+	3.2014877415775804e-09	1.22011397516063e-06	25.6825029674042
2200	chr20	33834707	33834707	+	4.62974103498937e-12	2.94123301234204e-09	25.6851937640041
1629	chr17	77373331	77373331	+	3.9721069766685e-09	1.48082341653489e-06	25.6890012642225
1005	chr13	53602461	53602461	+	5.17641485231479e-12	3.2672495995685804e-09	25.6954139747157
3168	chr6	145242698	145242698	+	8.27930022984091e-07	0.0001651880463898	25.6965312016804
2895	chr5	75703256	75703256	+	2.50641115639993e-08	7.7914972616945e-06	25.6989706877515
3077	chr6	32707557	32707557	+	1.00830451971179e-05	0.0013148176561225	25.7006151742994
1651	chr17	80112633	80112633	+	8.81517081552374e-14	7.334238524344559e-11	25.7055682684973
95	chr1	26900804	26900804	+	1.89492865843022e-12	1.2820454398758502e-09	25.7074136955292
1186	chr14	105133554	105133554	+	7.33191285462453e-13	5.29473859792319e-10	25.7088366179275
272	chr1	221064344	221064344	+	1.71964374628963e-07	4.26937958111429e-05	25.7096538351505
2844	chr5	7983793	7983793	+	3.3306690738754704e-15	3.4148700515940098e-12	25.713828425096
961	chr12	133284139	133284139	+	1.37829192503602e-10	6.8380631879277e-08	25.7142857142857
1141	chr14	89669967	89669967	+	1.00991987772581e-07	2.68083271273175e-05	25.7177368909212
2038	chr2	127868733	127868733	+	7.75888615467402e-06	0.0010642012259125	25.7225433526011
1481	chr16	90079927	90079927	+	7.793543588263669e-12	4.76989334450319e-09	25.7375032766721
595	chr11	361128	361128	+	1.24277366175818e-10	6.2099433542183e-08	25.7380225942113
2811	chr5	1442979	1442979	+	4.1966430330830905e-14	3.6613027132779096e-11	25.7431304657833
3197	chr6	167623345	167623345	+	1.27464705457214e-12	8.86361495722031e-10	25.7464712269273
1157	chr14	95967395	95967395	+	7.80486786311485e-14	6.55141088779523e-11	25.7572423909058
2460	chr22	50584800	50584800	+	2.04446743645725e-07	4.9636827859792e-05	25.7575757575758
305	chr1	237144730	237144730	+	3.27738725047766e-10	1.51526757633923e-07	25.7728515407549
2727	chr4	53733032	53733032	+	7.81381426229188e-09	2.73628492887577e-06	25.7823738132532
300	chr1	235048875	235048875	+	4.40034242377152e-09	1.62310152319498e-06	25.787728026534
298	chr1	234555404	234555404	+	3.74910193745581e-06	0.00058737680994	25.7902440954227
2145	chr2	241853330	241853330	+	1.11564979476952e-10	5.60824472685294e-08	25.7933949423311
1045	chr13	112978531	112978531	+	2.2496548745865e-05	0.002486244226444	25.7953752883738
2886	chr5	65083209	65083209	+	1.45550238528358e-13	1.17038172536629e-10	25.8109040717736
2142	chr2	241388747	241388747	+	7.352940478710929e-11	3.82231493914991e-08	25.8109360518999
3012	chr6	15513399	15513399	+	2.9105332588486e-09	1.1178184122514e-06	25.813865455332
3246	chr7	89274	89274	+	3.69337560535143e-10	1.68838822717819e-07	25.8215962441315
2794	chr5	435560	435560	+	2.35367281220533e-14	2.1455454776499e-11	25.8230758230758
2375	chr22	23241863	23241863	+	4.1159031738402503e-10	1.86724842126678e-07	25.8299501885923
3085	chr6	33049211	33049211	+	3.17856851950182e-13	2.43353480039375e-10	25.8313106796116
2461	chr22	50644176	50644176	+	3.0375923998349203e-10	1.41209295223913e-07	25.8418203504909
911	chr12	123471093	123471093	+	1.11022302462516e-16	1.37132955216678e-13	25.8449939301003
1232	chr15	58157973	58157973	+	3.65521178880002e-08	1.08851007221138e-05	25.8454106280193
2267	chr21	28093730	28093730	+	2.02766208186045e-05	0.0022879473706153	25.8631132646881
1328	chr16	9524534	9524534	+	6.99466584652697e-08	1.94059403452045e-05	25.8646779074795
3589	chr8	8770972	8770972	+	3.23789349443437e-06	0.0005202659829148	25.8790436005626
2593	chr3	182925882	182925882	+	2.8839918231327e-08	8.82259776019261e-06	25.8810155361879
2233	chr20	60094915	60094915	+	1.51824747607332e-06	0.0002759048987856	25.8813870375736
2002	chr2	99872724	99872724	+	2.0206059048177802e-14	1.85872275087433e-11	25.892141138733
370	chr10	2565662	2565662	+	9.01090313476516e-12	5.450032890209e-09	25.8938303902333
643	chr11	3223297	3223297	+	6.36294239519941e-10	2.78851690286186e-07	25.902185631677
1247	chr15	70078503	70078503	+	1.30838367917718e-08	4.35010523405084e-06	25.9025032938076
119	chr1	43472312	43472312	+	9.775180664917119e-12	5.872233675747071e-09	25.903322135125
187	chr1	120165314	120165314	+	1.1189922322074602e-09	4.66895726598212e-07	25.9045481267704
1750	chr19	835423	835423	+	7.314078787068471e-09	2.57418855439249e-06	25.9103641456583
3745	chr9	74744269	74744269	+	3.90442278508374e-09	1.45800521468325e-06	25.9168035030104
1199	chr14	106946528	106946528	+	5.6621374255883e-15	5.62589694951572e-12	25.9240142156033
1891	chr2	1204615	1204615	+	3.41590006516235e-05	0.003430883599954	25.9292674124865
2144	chr2	241585355	241585355	+	1.11022302462516e-16	1.37132955216678e-13	25.9328579916815
2199	chr20	32398023	32398023	+	1.30209052096042e-07	3.35220208352941e-05	25.939703944819
3558	chr8	1198613	1198613	+	4.66293670342566e-14	4.0380156194581295e-11	25.942634363687
785	chr11	130717916	130717916	+	4.66736324034045e-08	1.35208469374881e-05	25.9518194070081
749	chr11	102191336	102191336	+	3.87274924351644e-08	1.14629246523612e-05	25.9530791788856
1287	chr15	100821466	100821466	+	3.30846461338297e-14	2.9407853988662295e-11	25.9572685379137
3372	chr7	6568678	6568678	+	7.77711228749922e-13	5.585910987267331e-10	25.9600746188648
527	chr10	130919703	130919703	+	4.1940784178962095e-11	2.2773250789026e-08	25.9615484920875
2481	chr3	11966535	11966535	+	1.06914477271403e-13	8.755887377125729e-11	25.9645232815964
320	chr1	246470139	246470139	+	3.18078896555107e-13	2.43396113141294e-10	25.9669352597944
2597	chr3	188415806	188415806	+	5.92717571690216e-08	1.67330520569399e-05	25.9684684684685
3599	chr8	11895203	11895203	+	2.0634681846321e-05	0.0023205298055301	25.9703947368421
3600	chr8	12878830	12878830	+	9.9737549222878e-06	0.0013035288939248	25.9851198677322
2868	chr5	34687910	34687910	+	3.3357649975585e-11	1.84307978986291e-08	25.9869041185416
1488	chr17	65637	65637	+	2.65778080654755e-07	6.22264902926687e-05	25.9913406198849
2539	chr3	100631030	100631030	+	3.00633127281458e-08	9.15874845784845e-06	25.9950411066162
2905	chr5	96139250	96139250	+	1.00869394192848e-06	0.000195223912188	25.9968102073365
2277	chr21	41027746	41027746	+	1.1434964086731699e-11	6.798136204722311e-09	26.000908570187
3245	chr7	89222	89222	+	2.90401036551202e-12	1.904431088088e-09	26.004551004551
2248	chr20	61041652	61041652	+	1.5011991649771497e-11	8.7661839062738e-09	26.0106627447376
1647	chr17	79997489	79997489	+	3.7330138979996296e-12	2.4081482922885803e-09	26.0178748758689
1229	chr15	51176879	51176879	+	2.43143414723201e-05	0.0026408605308488	26.0236945019554
3299	chr7	1080899	1080899	+	1.0614953360743599e-11	6.348038333642841e-09	26.0314662488576
704	chr11	64175044	64175044	+	1.4494294653388798e-11	8.485891997997711e-09	26.0330216247808
1972	chr2	47039990	47039990	+	2.94439689296766e-08	8.9934745035407e-06	26.0394088669951
832	chr12	10264269	10264269	+	1.09887987598256e-10	5.53059502665187e-08	26.0438643834944
1095	chr13	114807180	114807180	+	7.771561172376101e-16	8.70959707528981e-13	26.0522613065327
2523	chr3	47398130	47398130	+	1.07306385999095e-11	6.409361909002011e-09	26.0631525337408
2639	chr4	1677882	1677882	+	1.15980980375241e-08	3.90223995616149e-06	26.0688704008542
2014	chr2	106714908	106714908	+	3.3030578272530394e-11	1.82569785849724e-08	26.0719672484378
2182	chr20	23549540	23549540	+	1.31778077339106e-09	5.42872719815258e-07	26.0795681727309
3644	chr8	87494973	87494973	+	2.179683776804e-07	5.23996292508499e-05	26.0941668469248
1406	chr16	84743502	84743502	+	1.30448703172803e-07	3.3574856534694e-05	26.0974324222574
1686	chr18	12041693	12041693	+	1.0880185641326501e-14	1.0407669548550001e-11	26.1019283746556
1474	chr16	89462771	89462771	+	2.38655206707961e-10	1.1329348852759e-07	26.1029411764706
103	chr1	31319002	31319002	+	1.4663274516824e-07	3.71617432232413e-05	26.1098901098901
157	chr1	96700020	96700020	+	1.7306512889447801e-09	6.95242478464772e-07	26.1135000265435
3816	chr9	138150488	138150488	+	1.11022302462516e-16	1.37132955216678e-13	26.1136304057782
2876	chr5	39604771	39604771	+	3.05006082279569e-07	7.02032340147341e-05	26.113749434645
2560	chr3	127861057	127861057	+	8.881784197001249e-16	9.88191546489155e-13	26.1211613983133
1673	chr18	165502	165502	+	3.73458560520845e-07	8.3758409639974e-05	26.1223344556678
2970	chr5	177037397	177037397	+	2.54800724963644e-09	9.90679352025752e-07	26.1261261261261
2583	chr3	167450310	167450310	+	4.53532433830617e-10	2.04295594001661e-07	26.1287374330853
694	chr11	60700950	60700950	+	9.781797594143879e-11	4.9744547037939e-08	26.1391807342699
971	chr13	24885777	24885777	+	1.98964733577611e-10	9.5930262594224e-08	26.1489222015538
547	chr10	133730683	133730683	+	4.64816396483769e-09	1.70505547462354e-06	26.1533704390847
2302	chr21	44878096	44878096	+	2.0026202918188598e-12	1.3483590564298401e-09	26.1551155115512
2211	chr20	46153065	46153065	+	2.52675601357666e-05	0.0027197603411285	26.1605116566949
1838	chr19	45594670	45594670	+	6.0224222830918e-08	1.69773740352858e-05	26.1813999342754
3219	chr6	170455498	170455498	+	1.35547516544321e-07	3.46979651361363e-05	26.1826484018265
1194	chr14	105654606	105654606	+	2.2043800118609604e-09	8.65645758652745e-07	26.1848931617669
3511	chr7	155143018	155143018	+	6.88482084211239e-05	0.0058507891448622	26.1904761904762
2462	chr22	50656427	50656427	+	1.22581500505703e-10	6.13245771730442e-08	26.1906873614191
880	chr12	97304436	97304436	+	1.62804658643267e-10	7.96906893093908e-08	26.1918024416284
3082	chr6	32904621	32904621	+	1.17601824722868e-07	3.0626614770316e-05	26.1930783242259
3431	chr7	63227217	63227217	+	9.08206903471598e-06	0.0012094616693118	26.1956998683633
1883	chr19	58817493	58817493	+	1.1015534040481601e-09	4.60210036279674e-07	26.1958041958042
2841	chr5	6766556	6766556	+	3.4240388302464497e-12	2.2220565736933204e-09	26.1960417640642
1889	chr2	983550	983550	+	1.04394271005503e-12	7.34664148737575e-10	26.2075697462057
3546	chr8	857079	857079	+	9.43689570931383e-15	9.09245226447361e-12	26.2180194883118
3705	chr8	144339052	144339052	+	3.43058914609173e-14	3.0410240233464895e-11	26.2219754037423
3041	chr6	29723267	29723267	+	2.21156426505331e-13	1.73634826415174e-10	26.2222867654177
1055	chr13	113434788	113434788	+	1.5145328324806e-09	6.14752541804955e-07	26.2232415902141
2317	chr21	47056869	47056869	+	4.69957406323829e-13	3.50986758768473e-10	26.226086192248
2041	chr2	128401911	128401911	+	2.20945484130652e-12	1.47877344214233e-09	26.2268743914314
2198	chr20	32398012	32398012	+	8.43195080424408e-09	2.93448589974842e-06	26.2314439946019
2552	chr3	125820900	125820900	+	1.0341727474383299e-12	7.28314115285417e-10	26.2328752315132
408	chr10	13972256	13972256	+	9.05298058739845e-12	5.4709591251147e-09	26.2381163489483
2701	chr4	10202574	10202574	+	3.33066907387547e-16	3.90153688040404e-13	26.2395966306581
1684	chr18	12035841	12035841	+	2.90878432451791e-14	2.6093012991409298e-11	26.2403534407964
3468	chr7	112087033	112087033	+	6.277534048138019e-12	3.90580686350597e-09	26.2636165577342
1242	chr15	67417607	67417607	+	3.04285374674862e-10	1.4142071395786e-07	26.264684727883
2802	chr5	537304	537304	+	1.5415446696920299e-12	1.0591199286362702e-09	26.2697788268205
2240	chr20	60806579	60806579	+	2.64171851060979e-09	1.02344314322232e-06	26.2766722608487
3611	chr8	26907937	26907937	+	4.09947004387234e-06	0.000631184767427	26.2789575289575
806	chr12	298137	298137	+	1.7148248376841502e-09	6.89736856927625e-07	26.280818324882
3819	chr9	138821365	138821365	+	9.54791801177635e-14	7.896734171315619e-11	26.2822039144721
3795	chr9	135071937	135071937	+	7.16537940093076e-13	5.18086949405049e-10	26.2875816993464
1113	chr14	25287676	25287676	+	2.09006145723833e-10	1.00358294603405e-07	26.296826533047
1733	chr18	77290985	77290985	+	1.9839907494656498e-11	1.13832463014229e-08	26.3014967812016
9	chr1	1560099	1560099	+	1.11022302462516e-16	1.37132955216678e-13	26.3079474853111
421	chr10	28615769	28615769	+	3.8536651159049e-07	8.60465797856108e-05	26.313083372884
3216	chr6	169641971	169641971	+	1.11022302462516e-16	1.37132955216678e-13	26.3181707018831
3725	chr8	145737816	145737816	+	5.55111512312578e-16	6.337650622479709e-13	26.3226962550003
663	chr11	11431532	11431532	+	1.11022302462516e-16	1.37132955216678e-13	26.3338371433969
990	chr13	39991644	39991644	+	1.00207816489117e-07	2.66203501478384e-05	26.3455992216547
2208	chr20	44680412	44680412	+	1.26494862362492e-08	4.2215215613504e-06	26.3456911148739
1697	chr18	40695902	40695902	+	3.41660033598146e-12	2.2182132098363303e-09	26.3525091799266
1433	chr16	87877313	87877313	+	5.10702591327572e-15	5.10903475616487e-12	26.3529411764706
2187	chr20	25440187	25440187	+	1.39732669879322e-11	8.207122203637071e-09	26.3544778304926
3606	chr8	22262379	22262379	+	3.68343212597821e-08	1.09591021093807e-05	26.3578500707214
412	chr10	14574817	14574817	+	1.03106412296938e-12	7.26727773072346e-10	26.359860664523
2950	chr5	153588667	153588667	+	5.29615240552062e-10	2.35557672142036e-07	26.3609791742784
1128	chr14	59198137	59198137	+	2.2204460492503099e-16	2.6476607245991e-13	26.366591647912
3781	chr9	129245316	129245316	+	1.08466117199058e-08	3.67432493638989e-06	26.3719570088489
3465	chr7	101842680	101842680	+	1.8408564672611802e-09	7.35769428322709e-07	26.375
1371	chr16	31715294	31715294	+	1.62647673107585e-13	1.29823125308422e-10	26.3835006846189
1679	chr18	9722306	9722306	+	1.0778700186842e-06	0.0002067932037176	26.3835616438356
3063	chr6	32301513	32301513	+	1.0382028570177199e-11	6.22145782583428e-09	26.3868034035121
905	chr12	121075426	121075426	+	7.41832308248647e-07	0.0001506498031381	26.3949036590724
1219	chr15	41632451	41632451	+	3.7496006299875294e-11	2.05620238543379e-08	26.3951979234263
2987	chr5	180079923	180079923	+	1.4679761850544502e-09	5.97512771541435e-07	26.3980884977165
1666	chr17	80738263	80738263	+	4.57335391779168e-08	1.32945778473106e-05	26.4048714998082
1775	chr19	4033718	4033718	+	1.11022302462516e-14	1.05958242305385e-11	26.4052287581699
1008	chr13	69558755	69558755	+	1.30593319491723e-08	4.34343842990936e-06	26.411036119558
1620	chr17	75373187	75373187	+	1.7448043010404e-11	1.0086053056501e-08	26.4281493154733
2432	chr22	45928205	45928205	+	1.4327428132787599e-12	9.89945965660387e-10	26.4319874216583
655	chr11	8240463	8240463	+	2.56017429478561e-13	1.99240835349618e-10	26.437064020254
907	chr12	121525590	121525590	+	1.35269573320329e-12	9.37737824578737e-10	26.4387464387464
1586	chr17	56388683	56388683	+	6.03961325396085e-12	3.76498031900555e-09	26.4402434127205
2184	chr20	23754847	23754847	+	2.60330312862322e-10	1.22592698210841e-07	26.4559154685605
1311	chr16	1859032	1859032	+	5.40283979666434e-07	0.0001149365512032	26.4559946510891
729	chr11	70944478	70944478	+	2.60425254694496e-08	8.06395239232211e-06	26.4593301435407
1749	chr19	805398	805398	+	6.66133814775094e-16	7.50561349807416e-13	26.4818383988139
2964	chr5	170845058	170845058	+	2.40585329436271e-13	1.87830547747681e-10	26.5031265031265
1136	chr14	74877620	74877620	+	1.61347872840167e-08	5.23749573304442e-06	26.5040650406504
122	chr1	44022534	44022534	+	1.03372865822848e-12	7.281766194336241e-10	26.5040962621608
1241	chr15	67093630	67093630	+	2.74715350467858e-08	8.44655324804307e-06	26.5063334474495
2251	chr20	61813383	61813383	+	1.11022302462516e-15	1.21901677639141e-12	26.5144106023712
1227	chr15	42170102	42170102	+	1.19682042054592e-13	9.736104326915709e-11	26.51696129957
2577	chr3	153501841	153501841	+	9.80195525523975e-07	0.0001905021035908	26.5185794597559
3373	chr7	6893547	6893547	+	2.92388113720676e-10	1.36367809762222e-07	26.5196243814665
1921	chr2	8168386	8168386	+	3.9812597663058094e-11	2.17265300946885e-08	26.5221987315011
1001	chr13	50194613	50194613	+	1.11022302462516e-16	1.37132955216678e-13	26.5265439014512
3510	chr7	154836613	154836613	+	5.407763126186179e-11	2.87813050348777e-08	26.5326009922041
1730	chr18	77082184	77082184	+	6.46260822634304e-13	4.71938222774463e-10	26.5341248106727
2027	chr2	113967386	113967386	+	2.90767410149328e-13	2.2419742182051702e-10	26.5391740220116
3815	chr9	137694517	137694517	+	1.34181554756196e-12	9.31298457399866e-10	26.540619548305
424	chr10	29834094	29834094	+	3.77453623912061e-12	2.430647287619e-09	26.5426120641948
2175	chr20	4861787	4861787	+	2.81274435653955e-06	0.0004627351528119	26.545842217484
1144	chr14	90922443	90922443	+	1.44776933573842e-05	0.0017579115446547	26.5463154779521
301	chr1	235117290	235117290	+	2.00312692211213e-07	4.87641508798095e-05	26.5567951318458
1221	chr15	42103556	42103556	+	4.22728518856275e-12	2.7008019345643704e-09	26.5650010815488
460	chr10	72054925	72054925	+	1.93273718140929e-08	6.16669933224413e-06	26.5661576788437
3083	chr6	32975868	32975868	+	2.48689957516035e-14	2.25854827695411e-11	26.5760922056598
1683	chr18	12028248	12028248	+	5.57563439862463e-10	2.46862545571048e-07	26.5808187584086
3738	chr9	36154750	36154750	+	8.802017226194891e-09	3.05021642675634e-06	26.5857904471766
2403	chr22	36716208	36716208	+	2.50910403565285e-14	2.2758884508765697e-11	26.5877636269791
2227	chr20	56669756	56669756	+	4.59107949657422e-07	9.99047354289124e-05	26.589183325585
1923	chr2	9463454	9463454	+	3.85691478754779e-13	2.92305447017733e-10	26.5922680287589
2991	chr6	689565	689565	+	1.11022302462516e-16	1.37132955216678e-13	26.6060802133271
1294	chr15	102041142	102041142	+	4.21848739273756e-08	1.23674272971167e-05	26.6117593228094
988	chr13	37749796	37749796	+	8.86652611220562e-07	0.0001751152176151	26.6362689835924
3113	chr6	39854660	39854660	+	6.45787956443655e-09	2.30195246801752e-06	26.6566205337669
3377	chr7	12634477	12634477	+	1.11022302462516e-16	1.37132955216678e-13	26.6719022687609
3653	chr8	106430675	106430675	+	9.63096611350522e-08	2.57178835063767e-05	26.6778523489933
1667	chr17	80759801	80759801	+	1.11022302462516e-16	1.37132955216678e-13	26.6786311034099
2500	chr3	22348143	22348143	+	1.32535646901744e-08	4.39903874176166e-06	26.6817350123776
1968	chr2	46299113	46299113	+	7.892532183362281e-10	3.39528629129125e-07	26.6890317770944
2011	chr2	102985812	102985812	+	1.04882815077367e-06	0.0002019098069391	26.6899993518699
2994	chr6	1664720	1664720	+	2.15994871544112e-07	5.19892663637565e-05	26.707775736902
1634	chr17	78188962	78188962	+	1.33226762955019e-15	1.4530062060751799e-12	26.708250166334
1844	chr19	46885977	46885977	+	1.1645908681856601e-09	4.84333172850034e-07	26.7115737905695
3590	chr8	8855985	8855985	+	1.6152584714213e-08	5.24175386181603e-06	26.7142605323462
1772	chr19	3820191	3820191	+	1.09245945623115e-13	8.931826861519329e-11	26.7362129059578
479	chr10	85974172	85974172	+	7.268062818255321e-10	3.14607189053783e-07	26.7398119122257
1568	chr17	31888792	31888792	+	1.55727888362378e-08	5.0766849985969e-06	26.7434302163618
203	chr1	147309362	147309362	+	1.7167156585173902e-10	8.36670296562461e-08	26.7547598749645
2437	chr22	46446562	46446562	+	1.7847945343873998e-12	1.2137061353293e-09	26.7689701363171
3361	chr7	4027299	4027299	+	7.449596495234799e-13	5.37257011524314e-10	26.7698540090193
2979	chr5	178634672	178634672	+	3.17190718135407e-12	2.06714430486646e-09	26.7760263929619
3487	chr7	139992324	139992324	+	5.44453371276177e-13	4.03105842981346e-10	26.7836119613845
3427	chr7	63020954	63020954	+	3.01836333704841e-12	1.97323179738253e-09	26.7852820140402
2772	chr4	185371236	185371236	+	4.91066651453487e-07	0.0001058437647322	26.7863490934945
2713	chr4	28170334	28170334	+	2.48704834504565e-10	1.17720444377664e-07	26.7883755588674
1115	chr14	35032169	35032169	+	2.12736495086574e-11	1.21558096296752e-08	26.7951127819549
641	chr11	2644013	2644013	+	1.61856155811435e-07	4.05353884468339e-05	26.8162393162393
3798	chr9	136081598	136081598	+	1.16911724745705e-09	4.86077446909175e-07	26.8241387701185
2477	chr3	11049516	11049516	+	9.35862498607776e-12	5.64517534688023e-09	26.8253968253968
1121	chr14	52490568	52490568	+	3.56892293496003e-12	2.3094218913796004e-09	26.8303004655099
707	chr11	65168281	65168281	+	7.34523553092004e-13	5.30174271220863e-10	26.8305084745763
1431	chr16	87869711	87869711	+	1.1205480987541699e-12	7.83861446420648e-10	26.8428419650235
1947	chr2	26464058	26464058	+	6.72511261812225e-06	0.0009465915607177	26.8477457501848
2103	chr2	233924081	233924081	+	2.67563748934663e-14	2.4186957364505e-11	26.8584712293156
3712	chr8	144643602	144643602	+	5.1633142206242196e-12	3.2596838668894904e-09	26.8745633414528
2303	chr21	45064600	45064600	+	9.44873845831751e-10	4.00295804164806e-07	26.8777213352685
2973	chr5	177412925	177412925	+	3.64447558798275e-08	1.08586541387552e-05	26.8801552644347
3539	chr7	158511628	158511628	+	5.74470915282177e-10	2.53734095411429e-07	26.8823099415205
3852	chrX	153280474	153280474	+	1.11022302462516e-16	1.37132955216678e-13	26.8867924528302
3042	chr6	29723301	29723301	+	8.711920074233599e-13	6.20857030618e-10	26.8956979263386
2723	chr4	41660249	41660249	+	4.76668862159357e-08	1.37758503803338e-05	26.9020224035683
1109	chr14	24721665	24721665	+	8.881784197001249e-16	9.88191546489155e-13	26.905425492382
1264	chr15	80136772	80136772	+	2.03775774032522e-10	9.80703332915331e-08	26.9093651446593
1246	chr15	68606655	68606655	+	2.30723218308526e-11	1.31118832997188e-08	26.9121942314713
1901	chr2	1821846	1821846	+	2.3742411370264404e-09	9.27678862084465e-07	26.9153012303368
3588	chr8	8770949	8770949	+	6.18347084802018e-06	0.0008844696005336	26.9230769230769
280	chr1	225768228	225768228	+	8.82516282274537e-13	6.28162369435698e-10	26.9281694803045
3702	chr8	144155360	144155360	+	1.1635015173538901e-10	5.83675741409616e-08	26.9290780141844
830	chr12	9317884	9317884	+	1.6709966743633199e-12	1.1410940093677901e-09	26.9387755102041
469	chr10	77875690	77875690	+	2.24154028671819e-13	1.7589392149742e-10	26.9595062869212
2611	chr3	196753905	196753905	+	4.921101304233841e-10	2.20181701309189e-07	26.9695675858718
2080	chr2	207974818	207974818	+	2.93809421236801e-12	1.92548846184043e-09	26.9735892625198
2824	chr5	2387924	2387924	+	6.66133814775094e-16	7.50561349807416e-13	26.9763321487459
3747	chr9	78802989	78802989	+	3.99680288865056e-15	4.06226014334809e-12	26.976682363664
3832	chrX	7810800	7810800	+	5.63664779185125e-07	0.000119053558616	26.9782207960675
1398	chr16	82186287	82186287	+	2.2204460492503099e-16	2.6476607245991e-13	26.9850290196663
1320	chr16	3405186	3405186	+	6.41261888034705e-07	0.0001330140230702	27.001030573686
1893	chr2	1481492	1481492	+	1.11022302462516e-16	1.37132955216678e-13	27.0112730894603
3748	chr9	79893894	79893894	+	1.56541446472147e-14	1.4662734922558197e-11	27.012832159891
3587	chr8	8652394	8652394	+	2.2204460492503099e-16	2.6476607245991e-13	27.0140057543022
860	chr12	56857422	56857422	+	3.0527356870147e-06	0.0004954389459615	27.0160072485654
1339	chr16	16260342	16260342	+	4.77362593898079e-12	3.02869647553005e-09	27.0277037540465
1864	chr19	55106777	55106777	+	9.992007221626409e-16	1.1004184185829099e-12	27.031147053884
3079	chr6	32729641	32729641	+	3.13368125892666e-08	9.48745279367711e-06	27.0311742852528
1101	chr13	114878046	114878046	+	2.6497692928728598e-11	1.4873631040991e-08	27.0360679627728
892	chr12	115759042	115759042	+	9.19933018650454e-11	4.70276468257455e-08	27.0381836945304
90	chr1	25040331	25040331	+	2.09320836219717e-08	6.61594598271039e-06	27.0428015564202
2131	chr2	240752778	240752778	+	2.88657986402541e-15	2.9920535754927597e-12	27.0704644246168
2997	chr6	2888212	2888212	+	4.50468908859136e-05	0.00424180158767	27.0730933882987
3396	chr7	37256391	37256391	+	8.09387001865502e-11	4.17557866183456e-08	27.0788394349081
2896	chr5	76090950	76090950	+	2.52640131037651e-10	1.19437893193923e-07	27.0833333333333
1282	chr15	99099744	99099744	+	9.99866855977416e-13	7.06705542512135e-10	27.0862470862471
3138	chr6	109245669	109245669	+	9.80176976694835e-07	0.0001905021035908	27.0915548539858
2545	chr3	115718524	115718524	+	2.08566824644318e-06	0.0003599515940411	27.0934959349593
1939	chr2	23508866	23508866	+	1.1789569320797e-11	6.991904073515271e-09	27.1040006718525
3188	chr6	167171837	167171837	+	6.66133814775094e-16	7.50561349807416e-13	27.1087743102668
2057	chr2	149335661	149335661	+	1.6124808155382202e-09	6.5125764222528e-07	27.1129108324795
2707	chr4	23729861	23729861	+	3.7792335927378004e-10	1.72548079868776e-07	27.117316977685
668	chr11	12296809	12296809	+	3.33066907387547e-16	3.90153688040404e-13	27.1260454444527
2100	chr2	232034342	232034342	+	4.1461970523570804e-09	1.53925358618583e-06	27.1482244576415
3349	chr7	2604890	2604890	+	5.111633338827909e-11	2.73294512745751e-08	27.1601000932241
808	chr12	298204	298204	+	6.994405055138491e-15	6.87262665118318e-12	27.1728803253145
2946	chr5	149533993	149533993	+	4.44089209850063e-16	5.12208073958707e-13	27.1760719710247
1386	chr16	71658593	71658593	+	1.77833583625553e-06	0.0003148184612695	27.1821097338996
2398	chr22	32600914	32600914	+	1.06624481466255e-08	3.61570616063613e-06	27.184199408534
1685	chr18	12037319	12037319	+	1.02826879233575e-08	3.49990611558351e-06	27.1846933129017
2094	chr2	220286141	220286141	+	9.25926002537381e-13	6.57461508705485e-10	27.2183630323165
2825	chr5	2639421	2639421	+	2.40593100997444e-11	1.36277900448368e-08	27.2317983020324
1422	chr16	86112141	86112141	+	4.78905803902308e-12	3.0365124145397302e-09	27.2403409813817
1131	chr14	70383017	70383017	+	1.01918473660589e-13	8.381922352271739e-11	27.2432432432432
646	chr11	5323071	5323071	+	1.39252054331962e-10	6.9016340572347e-08	27.2518530454399
2368	chr22	22549634	22549634	+	2.39808173319034e-14	2.1833068362226197e-11	27.2810404389352
2088	chr2	216524382	216524382	+	1.09146813143113e-07	2.86954184019178e-05	27.283832906263
3136	chr6	98722902	98722902	+	2.07518890960046e-10	9.96966520316858e-08	27.2908687764564
2880	chr5	55600842	55600842	+	4.33744902883504e-07	9.52568961393496e-05	27.2913430306454
784	chr11	130656995	130656995	+	4.2177372705509697e-13	3.17922056022841e-10	27.2954426791974
884	chr12	105762934	105762934	+	5.46162134407169e-08	1.55613693038185e-05	27.2968942488491
917	chr12	124105948	124105948	+	1.03730135592173e-10	5.24865974136452e-08	27.3066831301127
374	chr10	3148252	3148252	+	9.992007221626409e-16	1.1004184185829099e-12	27.3131230611276
1636	chr17	78311360	78311360	+	9.32587340685131e-15	8.99733252762876e-12	27.3308817896269
3288	chr7	937425	937425	+	2.66453525910038e-15	2.7835884690465697e-12	27.3366903497275
2730	chr4	57174133	57174133	+	5.98410210272959e-14	5.10953709715725e-11	27.3560339515376
1036	chr13	112574990	112574990	+	2.03839056744926e-10	9.80703332915331e-08	27.3630536130536
3671	chr8	134305524	134305524	+	6.66133814775094e-16	7.50561349807416e-13	27.3640221391385
2648	chr4	2325910	2325910	+	1.2042589148109101e-10	6.03087948047653e-08	27.3705408515535
94	chr1	26671555	26671555	+	1.47803378081068e-06	0.0002700023601018	27.3760374547776
3228	chr6	170562367	170562367	+	1.67082347957148e-10	8.15798604389514e-08	27.3774389244138
2867	chr5	34652808	34652808	+	9.60564960905685e-13	6.80241453121659e-10	27.3828814416497
2663	chr4	3765335	3765335	+	3.42037287381913e-10	1.57342020914696e-07	27.3855945497737
3537	chr7	158301370	158301370	+	2.01223926410421e-10	9.69556235837904e-08	27.3865097084094
2573	chr3	145804415	145804415	+	1.47936610377375e-05	0.0017872625742921	27.4016678705102
1407	chr16	84823078	84823078	+	2.8200108914688797e-11	1.57506707544559e-08	27.4170002354603
3386	chr7	28406673	28406673	+	7.65300870453345e-08	2.10214867049851e-05	27.4193548387097
1638	chr17	78670328	78670328	+	4.91707926819629e-07	0.0001059585697229	27.4286779787432
2858	chr5	14819417	14819417	+	2.2890909985418e-05	0.0025190766731772	27.4417471786961
1193	chr14	105522201	105522201	+	3.30935279180267e-12	2.1528822758637e-09	27.4462179042332
2189	chr20	25440592	25440592	+	2.4680257837417198e-12	1.6387145435197902e-09	27.4578651685393
43	chr1	9341132	9341132	+	3.10862446895044e-14	2.7724179169255297e-11	27.4615748211171
2661	chr4	3473649	3473649	+	1.11022302462516e-16	1.37132955216678e-13	27.4716615142147
2512	chr3	39799780	39799780	+	7.8989642438021e-07	0.0001586597922194	27.4717930573574
1492	chr17	135079	135079	+	1.11022302462516e-16	1.37132955216678e-13	27.4732620320856
1051	chr13	113373490	113373490	+	1.2534417948018e-13	1.01740898517471e-10	27.4780701754386
2881	chr5	55834229	55834229	+	2.5237589795779097e-11	1.42483093086778e-08	27.4804054152307
3134	chr6	91601016	91601016	+	4.3309800190627397e-13	3.25954206407746e-10	27.4875564032191
167	chr1	110254209	110254209	+	2.6964985799793298e-11	1.51185299686222e-08	27.4899162271176
1142	chr14	89784139	89784139	+	3.39685091166331e-08	1.02029328146083e-05	27.4920634920635
3772	chr9	114421364	114421364	+	7.45070671825943e-13	5.37257011524314e-10	27.4948354502874
2487	chr3	14241289	14241289	+	8.72840455468094e-09	3.02685775641474e-06	27.49511594326
840	chr12	16125652	16125652	+	6.55031584528842e-14	5.5621620091672294e-11	27.5018053608598
3084	chr6	33048602	33048602	+	2.91433543964104e-13	2.2459268465481002e-10	27.5052223668675
1607	chr17	72580937	72580937	+	9.55202583696746e-12	5.749982639999641e-09	27.5151902782219
2919	chr5	128299913	128299913	+	3.4366953727271696e-12	2.22928132109659e-09	27.5177633611369
812	chr12	694719	694719	+	4.06294645260985e-07	9.00597907617372e-05	27.5237995606235
957	chr12	132999036	132999036	+	9.992007221626409e-16	1.1004184185829099e-12	27.5271080494961
1987	chr2	74372924	74372924	+	1.77635683940025e-15	1.90398810788753e-12	27.5294198139026
3655	chr8	116663897	116663897	+	5.41899858319539e-13	4.01336513794852e-10	27.5312626058895
2554	chr3	127295084	127295084	+	3.01647595790655e-13	2.31488664295274e-10	27.53196888801
1832	chr19	42093112	42093112	+	9.16128073402689e-09	3.16049123048043e-06	27.5371932151995
2372	chr22	23153461	23153461	+	3.8565706184101594e-11	2.11130144408697e-08	27.5405699584405
2083	chr2	208976971	208976971	+	2.19491091968393e-13	1.7246615963634e-10	27.5691493067651
1493	chr17	146427	146427	+	3.33066907387547e-16	3.90153688040404e-13	27.5794255325042
1447	chr16	88085847	88085847	+	9.67175795008046e-09	3.31937834871362e-06	27.5819810682894
3538	chr7	158326803	158326803	+	1.8240964294591298e-12	1.23784340492197e-09	27.5833525833526
3043	chr6	29723315	29723315	+	2.2204460492503099e-16	2.6476607245991e-13	27.5834516112075
2986	chr5	179961589	179961589	+	4.46819862220948e-08	1.30199380955761e-05	27.5862068965517
2903	chr5	96062617	96062617	+	9.76108083250438e-13	6.90570204536543e-10	27.5922382040044
2433	chr22	45929390	45929390	+	5.55111512312578e-16	6.337650622479709e-13	27.5926091624911
1752	chr19	897215	897215	+	4.7406523151494203e-14	4.09925010572838e-11	27.6096932760153
3481	chr7	134942826	134942826	+	4.00488514573638e-08	1.18181694772885e-05	27.6198869060733
2734	chr4	88653805	88653805	+	3.16504469632939e-07	7.25076118731094e-05	27.6312056737589
2900	chr5	83313840	83313840	+	6.98270330445894e-11	3.64474510936314e-08	27.6438690628283
3591	chr8	8907293	8907293	+	2.99984259655162e-10	1.39617538626486e-07	27.6811640448004
161	chr1	101003807	101003807	+	1.11022302462516e-16	1.37132955216678e-13	27.6817248459959
3391	chr7	35634290	35634290	+	6.9281050994463e-05	0.0058790356163069	27.682824320538
647	chr11	5444136	5444136	+	8.348877145181181e-14	6.97603409831665e-11	27.6892102269325
1151	chr14	94088586	94088586	+	1.5674691544731402e-09	6.34216084256744e-07	27.6954314720812
65	chr1	16729699	16729699	+	2.06920036660563e-11	1.18465892807627e-08	27.6975084512333
1299	chr16	908488	908488	+	1.06248343456627e-13	8.706206893286269e-11	27.7071550311018
1881	chr19	58817442	58817442	+	3.59828500329229e-10	1.64878227765184e-07	27.7186147186147
237	chr1	183901615	183901615	+	1.11022302462516e-16	1.37132955216678e-13	27.7352528089888
2111	chr2	238243656	238243656	+	8.61422044806659e-13	6.147928259213601e-10	27.7356902356902
3075	chr6	32609056	32609056	+	2.62251040783479e-06	0.0004360891208925	27.7416440831075
1293	chr15	102041116	102041116	+	6.64898353042176e-08	1.85435825240773e-05	27.7418659771601
2921	chr5	131330054	131330054	+	1.88737914186277e-15	2.01634008960981e-12	27.7486910994764
958	chr12	133024764	133024764	+	1.11026743354614e-11	6.615372951072e-09	27.7528291719059
1078	chr13	114302292	114302292	+	1.11022302462516e-16	1.37132955216678e-13	27.7584184277896
872	chr12	76017917	76017917	+	1.8509638266550598e-12	1.2543304332986e-09	27.761744966443
2646	chr4	1762973	1762973	+	2.14231210549087e-09	8.44159404257473e-07	27.7621670225919
1048	chr13	113291655	113291655	+	8.06021915877864e-14	6.75219429943982e-11	27.762768244696
2820	chr5	1859807	1859807	+	2.34812169708221e-13	1.83617252397401e-10	27.7787509853727
1218	chr15	41158314	41158314	+	5.1703530346003397e-11	2.76181660321073e-08	27.7793904208999
2283	chr21	43530399	43530399	+	1.06189612658625e-10	5.36475816648208e-08	27.783860864251
3167	chr6	145036327	145036327	+	2.71514249972071e-08	8.36306916478377e-06	27.8003246753247
1329	chr16	10187400	10187400	+	3.23385638267837e-08	9.7544369358324e-06	27.8012444928919
3694	chr8	143397483	143397483	+	6.66133814775094e-16	7.50561349807416e-13	27.8279560057622
1278	chr15	92487249	92487249	+	4.75326709992174e-07	0.000102959324281	27.8406500020727
869	chr12	68304149	68304149	+	2.0877743978076097e-12	1.40150084719678e-09	27.8430727281275
1550	chr17	18548225	18548225	+	3.8746783559418e-14	3.4057951891559094e-11	27.8487676904681
396	chr10	6322228	6322228	+	6.7695626881914e-11	3.54170562355445e-08	27.8525583883045
2232	chr20	59864318	59864318	+	3.5139668952410797e-12	2.2763772741241802e-09	27.8531379996383
688	chr11	59022864	59022864	+	1.7491819104265002e-10	8.51642196554697e-08	27.8626509530045
2599	chr3	191178814	191178814	+	1.64326982021734e-08	5.32203085861424e-06	27.8692810457516
1270	chr15	85165699	85165699	+	1.11022302462516e-16	1.37132955216678e-13	27.8700759780873
3087	chr6	33050741	33050741	+	1.02020025760652e-09	4.28731802422545e-07	27.8882438316401
1534	chr17	14111608	14111608	+	1.69196545662942e-10	8.2529515649382e-08	27.8925805197524
288	chr1	228771394	228771394	+	2.0872192862952902e-14	1.9157835172761097e-11	27.905814841514
84	chr1	22612534	22612534	+	7.760252773714171e-09	2.7194811840322e-06	27.9124358554427
2186	chr20	25281332	25281332	+	8.21565038222616e-15	7.97883499741617e-12	27.9308496381667
1608	chr17	72581038	72581038	+	9.78106484694763e-14	8.08042581508247e-11	27.9348782073343
1649	chr17	80092778	80092778	+	1.08918607466535e-09	4.55303203783358e-07	27.9366197183099
2079	chr2	201167771	201167771	+	5.26120028321309e-07	0.0001123727304997	27.9408293335432
40	chr1	7427957	7427957	+	6.02018435102991e-12	3.75526875346474e-09	27.9409643767127
2553	chr3	126208651	126208651	+	1.53439675965039e-07	3.86448313402022e-05	27.9491833030853
2624	chr4	944504	944504	+	2.75926603676702e-07	6.43041400011151e-05	27.9501915708812
3347	chr7	2576019	2576019	+	2.2204460492503099e-16	2.6476607245991e-13	27.9617157036512
1404	chr16	84494252	84494252	+	7.43849426498855e-15	7.277216332616769e-12	27.9682862453913
1324	chr16	4660246	4660246	+	7.3005385292646e-08	2.01608859942616e-05	27.9723589549413
683	chr11	42261877	42261877	+	1.26859608817753e-07	3.27750585853981e-05	27.9784320438206
483	chr10	93656352	93656352	+	2.61235477694299e-13	2.03031696028487e-10	28.0250404986134
959	chr12	133140484	133140484	+	3.83187979313693e-06	0.0005978489547749	28.0267295597484
1240	chr15	66870968	66870968	+	7.07334191218933e-11	3.68810821356724e-08	28.0351352314435
2845	chr5	9301496	9301496	+	2.63067345684931e-12	1.7380326418316602e-09	28.0400484191953
1046	chr13	113007675	113007675	+	8.688844088666771e-09	3.01385323250614e-06	28.0543526952367
969	chr13	21926900	21926900	+	1.89395055194552e-10	9.16788162223214e-08	28.0630177149014
1709	chr18	58221230	58221230	+	5.94497400140392e-05	0.0052379900987387	28.0701754385965
1665	chr17	80708527	80708527	+	1.38222766565832e-13	1.1151381962526801e-10	28.072797608581
3124	chr6	63921455	63921455	+	2.72194489170374e-10	1.277027501933e-07	28.08410748177
3343	chr7	2421198	2421198	+	2.72004641033163e-14	2.4527782087068098e-11	28.0860287422305
2771	chr4	185354937	185354937	+	3.27096316699027e-09	1.24383764200784e-06	28.1236380703342
382	chr10	3792676	3792676	+	1.67899028014062e-12	1.14628518993149e-09	28.1284049953902
3244	chr7	82870	82870	+	3.10304004713657e-11	1.72229937907739e-08	28.1292517006803
775	chr11	126079939	126079939	+	1.10652376150711e-10	5.56332492833751e-08	28.1323520540508
2801	chr5	536783	536783	+	4.68890481997164e-11	2.52306756096809e-08	28.1384421944279
1418	chr16	85476438	85476438	+	1.0641154624124699e-11	6.36110733557687e-09	28.1400966183575
3144	chr6	118158769	118158769	+	4.41683349894362e-08	1.2886947604064e-05	28.1403329646331
2667	chr4	4346849	4346849	+	1.02806652080289e-13	8.45021744553637e-11	28.1433124293204
3411	chr7	47674722	47674722	+	2.60713721722539e-08	8.06946899752371e-06	28.1484992101106
1904	chr2	2009172	2009172	+	2.68673971959288e-13	2.08425368398226e-10	28.1514297221104
3664	chr8	127885598	127885598	+	1.52396790298326e-07	3.84361274829313e-05	28.1538770590599
2204	chr20	43803613	43803613	+	5.54664869589772e-10	2.45690722175989e-07	28.178641175866
2373	chr22	23154058	23154058	+	1.51800794156998e-12	1.0439294397718701e-09	28.1842818428184
2183	chr20	23589053	23589053	+	2.90766906108075e-08	8.8915011067852e-06	28.1895881895882
1319	chr16	3205394	3205394	+	1.734046684021e-09	6.96510864830705e-07	28.1937276697102
114	chr1	38463504	38463504	+	2.70894418008538e-14	2.4442733549684697e-11	28.1992468054302
762	chr11	119479052	119479052	+	6.21457330041153e-11	3.27594614533714e-08	28.20595266388
2511	chr3	37862718	37862718	+	9.214851104388799e-14	7.63421335939686e-11	28.2177358708856
839	chr12	16125644	16125644	+	3.88578058618805e-15	3.95904560647314e-12	28.2207697893972
1928	chr2	11701842	11701842	+	5.44085887455026e-11	2.89415963706716e-08	28.2220059420141
2215	chr20	48427795	48427795	+	1.56541446472147e-13	1.25428214397787e-10	28.2299328429805
1882	chr19	58817477	58817477	+	9.54580858802956e-12	5.74748927461693e-09	28.2300934474848
970	chr13	24331902	24331902	+	2.1020962748252698e-12	1.4104678195776101e-09	28.2312000434995
3777	chr9	126118524	126118524	+	1.31266926217677e-08	4.36039037066633e-06	28.2365425429288
497	chr10	112193566	112193566	+	3.66955676955882e-08	1.09244842230349e-05	28.2593768775212
1476	chr16	89560178	89560178	+	2.9420910152566604e-14	2.6351396477105e-11	28.2604449097913
2174	chr20	3686436	3686436	+	2.88657986402541e-15	2.9920535754927597e-12	28.2629877319633
2666	chr4	4238224	4238224	+	1.6067785990614402e-09	6.49402772661372e-07	28.2842478308689
440	chr10	43209942	43209942	+	2.23736806859165e-10	1.06709916085665e-07	28.2925264620977
1931	chr2	15909049	15909049	+	1.49269485660852e-12	1.0277293809087601e-09	28.3151107373143
27	chr1	3416449	3416449	+	1.965927420855e-11	1.12862460169882e-08	28.3444232162857
1930	chr2	12134346	12134346	+	5.198725894217661e-10	2.31541166073572e-07	28.3524904214559
795	chr12	258380	258380	+	5.55111512312578e-16	6.337650622479709e-13	28.3570642156438
3728	chr9	7304018	7304018	+	1.6595036456124e-10	8.1054206272618e-08	28.3637409336358
1806	chr19	17313832	17313832	+	2.04625205668663e-12	1.3748889946753301e-09	28.378476508605
2780	chr4	187078937	187078937	+	2.2204460492503099e-16	2.6476607245991e-13	28.3794162826421
2706	chr4	18937568	18937568	+	1.9195756095768997e-12	1.2975207246488e-09	28.3937871383669
3086	chr6	33050668	33050668	+	7.08753222777858e-08	1.96319446177972e-05	28.3962264150943
3443	chr7	76634236	76634236	+	3.25746762896983e-10	1.50701038408073e-07	28.3976892672545
2311	chr21	46375844	46375844	+	1.5453194279757598e-12	1.0612150403831902e-09	28.4176087490784
3521	chr7	157255077	157255077	+	4.49971062854715e-07	9.82232801947845e-05	28.4223981527297
1137	chr14	75489632	75489632	+	6.863187795858039e-11	3.58684063447169e-08	28.4266169154229
1952	chr2	33467069	33467069	+	2.55351295663786e-15	2.67333213985371e-12	28.4352943881187
3674	chr8	135283586	135283586	+	5.71517191350068e-08	1.61954807399347e-05	28.4369643135422
3845	chrX	149677235	149677235	+	7.19424519957101e-14	6.07720684609078e-11	28.4372209022126
1962	chr2	42935961	42935961	+	1.62949653770283e-11	9.462496889492851e-09	28.4400036957354
2468	chr3	3186771	3186771	+	9.8574674090024e-07	0.000191393288408	28.446348733234
2213	chr20	46764459	46764459	+	7.75387531959382e-10	3.34005689618961e-07	28.4534772943792
2753	chr4	119436129	119436129	+	1.04694031222152e-13	8.59569294518901e-11	28.4559479790896
3746	chr9	77716145	77716145	+	4.59909887950971e-12	2.9224008023619402e-09	28.4769137585612
3646	chr8	92623494	92623494	+	3.9920622363354096e-11	2.17773584831122e-08	28.4842871742463
966	chr13	19879736	19879736	+	1.04360964314765e-14	1.00090426959623e-11	28.5036055000672
1817	chr19	34232171	34232171	+	8.58432835926237e-09	2.98290430006134e-06	28.5163971818136
3652	chr8	103997435	103997435	+	2.04249861468497e-09	8.07874889895998e-07	28.533725710015
2212	chr20	46153084	46153084	+	1.23403462060079e-06	0.000231918502131	28.5682722050376
39	chr1	6565218	6565218	+	1.77635683940025e-15	1.90398810788753e-12	28.5830753253812
2507	chr3	31758461	31758461	+	4.3488213030684593e-11	2.35261708782735e-08	28.5890261500018
1395	chr16	80716810	80716810	+	2.89308721868053e-07	6.70256783391733e-05	28.6041383989145
482	chr10	92654347	92654347	+	1.6816006365161202e-09	6.77397662414423e-07	28.613383679463
1917	chr2	3773488	3773488	+	2.2204460492503099e-16	2.6476607245991e-13	28.6212694409416
472	chr10	81164521	81164521	+	2.9409230384303e-08	8.98380160042036e-06	28.6301369863014
3474	chr7	128120483	128120483	+	1.11337872255035e-09	4.64818626949379e-07	28.6315147820786
143	chr1	64386919	64386919	+	3.33066907387547e-16	3.90153688040404e-13	28.643216080402
3597	chr8	10996847	10996847	+	1.25455201782643e-14	1.1899539939267099e-11	28.6648238339695
2567	chr3	134571279	134571279	+	7.89035503601099e-13	5.65891340501313e-10	28.6762075134168
64	chr1	16378215	16378215	+	6.66133814775094e-16	7.50561349807416e-13	28.6776639294625
2969	chr5	176894756	176894756	+	1.11022302462516e-16	1.37132955216678e-13	28.6852310013862
1107	chr14	24555200	24555200	+	4.05231403988182e-14	3.5491412565559094e-11	28.6885245901639
3280	chr7	893951	893951	+	2.78913330209463e-08	8.56123353956743e-06	28.6964454656035
925	chr12	125594244	125594244	+	6.66133814775094e-16	7.50561349807416e-13	28.7075845899375
1574	chr17	47157427	47157427	+	1.24789067967868e-13	1.01318423779395e-10	28.7290907257193
379	chr10	3499047	3499047	+	7.43849426498855e-15	7.277216332616769e-12	28.754437413181
2505	chr3	30672362	30672362	+	5.41763633954417e-10	2.40376338590319e-07	28.7602281180263
2188	chr20	25440478	25440478	+	2.46469511466785e-14	2.2404687648849e-11	28.7663654803614
3115	chr6	41609220	41609220	+	4.773959005888171e-15	4.797157537451e-12	28.7669580946638
3123	chr6	63921441	63921441	+	1.70630842788455e-10	8.32013887180148e-08	28.774062816616
133	chr1	53568100	53568100	+	3.38206906813632e-07	7.67999631265873e-05	28.7857142857143
492	chr10	105561886	105561886	+	1.11022302462516e-16	1.37132955216678e-13	28.7917415472061
2222	chr20	56273171	56273171	+	1.04583119941992e-09	4.38495419778763e-07	28.8067109689064
841	chr12	16514920	16514920	+	3.12083692222132e-13	2.39246493639837e-10	28.8298273225013
1356	chr16	29266340	29266340	+	3.5527136788005e-15	3.63234628548774e-12	28.845665961945
1590	chr17	61559923	61559923	+	1.11022302462516e-16	1.37132955216678e-13	28.8502136215129
3444	chr7	76709079	76709079	+	4.35320125502514e-08	1.27365916478242e-05	28.8529934795495
1204	chr15	22550097	22550097	+	9.041356552330629e-11	4.62720393527e-08	28.8669424796477
30	chr1	4066955	4066955	+	7.60080887118875e-12	4.65489975393987e-09	28.8835125448029
3691	chr8	143154754	143154754	+	1.24407325552411e-08	4.15659469654864e-06	28.8960329598302
2649	chr4	2426642	2426642	+	3.8746783559418e-14	3.4057951891559094e-11	28.9105513737798
3158	chr6	138028152	138028152	+	1.25921495452985e-12	8.76409574788078e-10	28.9174565130552
442	chr10	44894107	44894107	+	1.14952491969689e-12	8.03363499112644e-10	28.947923021463
1196	chr14	106025760	106025760	+	1.36912148285262e-10	6.79602302602669e-08	28.9529914529915
3554	chr8	1020811	1020811	+	6.492539839086929e-11	3.40407614970966e-08	28.9723444374607
3019	chr6	22214803	22214803	+	1.9095836023552702e-14	1.7610239834928897e-11	28.9772727272727
3672	chr8	134369305	134369305	+	5.80012704531896e-11	3.06964096895745e-08	28.9824561403509
2747	chr4	108910024	108910024	+	3.774758283725531e-15	3.8539815111244e-12	28.9838454015042
921	chr12	124810173	124810173	+	3.03990166372614e-12	1.9864247234123303e-09	28.9967939515743
3323	chr7	1245797	1245797	+	3.06654701631714e-12	2.00249458256158e-09	29.0280267019923
67	chr1	17891594	17891594	+	2.80645617856123e-10	1.31267795359515e-07	29.0328092959672
1966	chr2	45551148	45551148	+	1.20777163825636e-08	4.04685862598005e-06	29.034749034749
3065	chr6	32379505	32379505	+	1.16240350678254e-13	9.477201603259969e-11	29.0386363078132
2056	chr2	149310951	149310951	+	1.0658141036401501e-14	1.0205276573035899e-11	29.0438452037876
1388	chr16	77612894	77612894	+	3.8443692673695296e-12	2.4723523579433103e-09	29.0470085470085
714	chr11	65592244	65592244	+	2.30955254920673e-10	1.0992352718961e-07	29.054054054054
1727	chr18	76416372	76416372	+	1.10023101740353e-13	8.992853608104329e-11	29.0574060949681
2892	chr5	74916871	74916871	+	1.12145711606004e-08	3.78844649256866e-06	29.0747193186218
2702	chr4	10202693	10202693	+	5.02820007852733e-13	3.7371781565754005e-10	29.0814319433517
526	chr10	130675563	130675563	+	1.92449705560538e-06	0.0003365024265901	29.1149068322981
1986	chr2	72126419	72126419	+	1.61781699148378e-12	1.1078811308392e-09	29.1289190481187
3736	chr9	35909517	35909517	+	8.94839757847876e-14	7.43451404179721e-11	29.1316526610644
3515	chr7	156309402	156309402	+	1.0991207943789e-14	1.0500140097917899e-11	29.1721020538179
2384	chr22	24241101	24241101	+	5.55111512312578e-16	6.337650622479709e-13	29.1836734693878
1847	chr19	48251461	48251461	+	2.18975948484967e-11	1.24928171398073e-08	29.2028155180881
503	chr10	119024502	119024502	+	2.5454971464000696e-11	1.43627224515842e-08	29.2035564932374
223	chr1	171868143	171868143	+	4.18409751290483e-12	2.6755461581340602e-09	29.2096131602622
76	chr1	20650384	20650384	+	1.3988810110277e-14	1.31915450642756e-11	29.2144221585482
599	chr11	395389	395389	+	1.66533453693773e-15	1.79221021096898e-12	29.2238833517903
687	chr11	47776283	47776283	+	4.22719291570672e-07	9.31571234827295e-05	29.2244114209384
3448	chr7	90406118	90406118	+	2.89768209427166e-14	2.60093682230273e-11	29.2256328483157
1902	chr2	1843222	1843222	+	1.91161242391047e-08	6.10662198354073e-06	29.2327044025157
222	chr1	168678913	168678913	+	9.25737887458311e-08	2.48632255560723e-05	29.2487402656894
3371	chr7	5515336	5515336	+	1.77635683940025e-15	1.90398810788753e-12	29.2553191489362
1635	chr17	78231611	78231611	+	1.43052236722951e-12	9.8864520669664e-10	29.2668488160292
216	chr1	160764759	160764759	+	3.00881541903664e-12	1.96830916154395e-09	29.3102473498233
733	chr11	71419019	71419019	+	1.40322697905759e-08	4.63384876443506e-06	29.3323514973
2031	chr2	120891110	120891110	+	1.8873791418627702e-14	1.7421941657543397e-11	29.3330183479014
59	chr1	14609021	14609021	+	5.087876786546991e-10	2.27018808084172e-07	29.3348538172667
864	chr12	64336805	64336805	+	3.44912847172196e-08	1.03376719849145e-05	29.3486689066942
752	chr11	109566635	109566635	+	2.6754154447417e-11	1.50089500823398e-08	29.3638856940635
1999	chr2	99696416	99696416	+	2.49454013001582e-10	1.18036868727426e-07	29.3908929627439
2424	chr22	43817480	43817480	+	3.09752223870419e-14	2.7650446578224098e-11	29.3918918918919
1053	chr13	113422115	113422115	+	7.682743330406081e-14	6.460018272084779e-11	29.4142980189492
3251	chr7	207293	207293	+	2.04236627610044e-12	1.37259329187627e-09	29.4225888324873
1326	chr16	8776983	8776983	+	2.09499084746767e-13	1.64969284473622e-10	29.4235009975848
743	chr11	83324405	83324405	+	1.54098181603946e-06	0.0002792743565171	29.431643625192
3175	chr6	157405760	157405760	+	1.34781075189494e-13	1.08947435547704e-10	29.4362968486757
3092	chr6	33111436	33111436	+	1.1331853344565e-08	3.82453389218106e-06	29.4376693766938
2478	chr3	11075014	11075014	+	4.07451850037432e-14	3.5664536441325095e-11	29.4438778571
3071	chr6	32549496	32549496	+	2.9976021664879203e-15	3.0928897089296098e-12	29.4453743642567
702	chr11	62315698	62315698	+	1.33226762955019e-15	1.4530062060751799e-12	29.4528875379939
1252	chr15	74228464	74228464	+	1.35259803357712e-10	6.71856301770913e-08	29.4656829868097
3370	chr7	5292732	5292732	+	2.6383673024099598e-11	1.48266946822668e-08	29.5073375262055
213	chr1	158695852	158695852	+	3.76776387867039e-12	2.42735454176911e-09	29.5092424201298
1345	chr16	23850300	23850300	+	6.61940502411085e-11	3.46686515516136e-08	29.5466265577997
1835	chr19	43912708	43912708	+	8.881784197001249e-16	9.88191546489155e-13	29.5730641727655
1195	chr14	106025750	106025750	+	2.56997756409305e-10	1.21273040654359e-07	29.5756345177665
2549	chr3	125488000	125488000	+	4.4648140740122203e-10	2.0130536422225e-07	29.5961185418306
2711	chr4	25413921	25413921	+	1.91899630630488e-08	6.12686534470188e-06	29.6052631578947
459	chr10	71716509	71716509	+	3.99680288865056e-15	4.06226014334809e-12	29.6492718008023
2920	chr5	129244122	129244122	+	1.27599075749885e-08	4.25374186305226e-06	29.653953018439
1624	chr17	77104323	77104323	+	2.04281036531029e-14	1.8773777213294298e-11	29.6688841282369
1833	chr19	43497631	43497631	+	9.734202333078201e-10	4.1102080038242e-07	29.6765880685479
2171	chr20	3074039	3074039	+	5.03042052457658e-13	3.73787906598667e-10	29.7032474804031
521	chr10	129185404	129185404	+	1.68753899743024e-14	1.57060851075264e-11	29.7040294781885
1288	chr15	100821575	100821575	+	9.214851104388799e-14	7.63421335939686e-11	29.7158502293917
438	chr10	35641570	35641570	+	3.43391981516561e-13	2.62080499222588e-10	29.7400672331189
3641	chr8	80966394	80966394	+	1.96287430753728e-12	1.3249517244887902e-09	29.7405748413587
498	chr10	115388944	115388944	+	7.75379760398209e-13	5.571900561944101e-10	29.7442455242967
2062	chr2	159726268	159726268	+	2.40639834725442e-08	7.50771280136417e-06	29.7633136094674
3771	chr9	112970171	112970171	+	6.5503158452884204e-15	6.4579549473013095e-12	29.7986577181208
1828	chr19	39524514	39524514	+	7.52731210695856e-13	5.42246391619483e-10	29.8146862092913
2710	chr4	25394530	25394530	+	1.2143619443350001e-11	7.1858561492317406e-09	29.8193015152743
1971	chr2	46747656	46747656	+	7.874734198054509e-11	4.07042179278339e-08	29.8197545401024
2832	chr5	6528896	6528896	+	2.96748292605287e-10	1.38225115929587e-07	29.8199152542373
2064	chr2	162982446	162982446	+	1.88468129991293e-11	1.08368269085247e-08	29.8278008298755
2371	chr22	22896851	22896851	+	9.82869785559615e-10	4.14472540585972e-07	29.8315355714459
3404	chr7	44114250	44114250	+	1.97752925146233e-12	1.33330605940526e-09	29.8618430423017
1122	chr14	52584356	52584356	+	4.44089209850063e-16	5.12208073958707e-13	29.8677248677249
1633	chr17	78152513	78152513	+	3.7336800318144e-13	2.83259265274733e-10	29.8696246699359
2075	chr2	187867339	187867339	+	5.08482145278322e-14	4.38131715771513e-11	29.8957921667325
2922	chr5	131561758	131561758	+	1.63202784619898e-14	1.52330436119686e-11	29.9011299435028
3456	chr7	97912241	97912241	+	3.05311331771918e-14	2.7287321930294797e-11	29.9228736838015
1479	chr16	89613372	89613372	+	7.771561172376101e-16	8.70959707528981e-13	29.9536804769627
3827	chr9	140262426	140262426	+	1.11022302462516e-16	1.37132955216678e-13	29.9817480644117
1079	chr13	114302501	114302501	+	1.4432899320127001e-15	1.56766281433112e-12	30.0097042649754
407	chr10	13972210	13972210	+	1.4432899320127001e-15	1.56766281433112e-12	30.0197891432666
2594	chr3	184071016	184071016	+	1.64172009320396e-11	9.53021233999043e-09	30.0231123335816
2278	chr21	41269489	41269489	+	2.55351295663786e-15	2.67333213985371e-12	30.0471678069094
1368	chr16	29999224	29999224	+	6.43929354282591e-15	6.354921521983799e-12	30.0496081251651
838	chr12	16125596	16125596	+	1.77635683940025e-15	1.90398810788753e-12	30.059480911336
799	chr12	297806	297806	+	1.02939878843245e-12	7.258255003040601e-10	30.0653594771242
548	chr10	133797225	133797225	+	6.62880861312942e-12	4.10429368155363e-09	30.0846300846301
1609	chr17	73088369	73088369	+	1.16116338766403e-10	5.8260268864454e-08	30.0963808025177
1475	chr16	89496727	89496727	+	3.42035311184929e-09	1.29475654901487e-06	30.1016397124888
853	chr12	48392914	48392914	+	4.37978986411736e-10	1.97776612652211e-07	30.1019091847265
1342	chr16	19869391	19869391	+	4.72076111535102e-09	1.72908470555076e-06	30.1187980433263
3525	chr7	157527957	157527957	+	1.4285956861925801e-09	5.83838644694633e-07	30.1597162900261
3659	chr8	124514261	124514261	+	2.70720691752935e-07	6.32521159245195e-05	30.1670551670552
732	chr11	71288427	71288427	+	1.74549263931567e-12	1.1886372442682e-09	30.1855813722076
3275	chr7	886918	886918	+	5.55111512312578e-16	6.337650622479709e-13	30.1949025487256
3174	chr6	155761493	155761493	+	1.78523862359725e-12	1.21372606231543e-09	30.2141157811261
2614	chr4	759576	759576	+	7.771561172376101e-16	8.70959707528981e-13	30.2157300331372
863	chr12	62523297	62523297	+	4.13196143966843e-10	1.87424294225437e-07	30.2406417112299
1065	chr13	113694514	113694514	+	9.2548191332753e-13	6.5730568094458e-10	30.2478448275862
2217	chr20	52417889	52417889	+	6.07291994469961e-14	5.18083906958733e-11	30.2678509949735
2728	chr4	54448574	54448574	+	1.67932778794011e-10	8.19814134580903e-08	30.2717578259374
296	chr1	234342773	234342773	+	1.85426999976812e-07	4.56454376313745e-05	30.2801724137931
3791	chr9	133847281	133847281	+	6.64771571123879e-11	3.48044676229525e-08	30.2873832994315
2018	chr2	107082754	107082754	+	5.967687233265911e-09	2.14235691973048e-06	30.3164983164983
2777	chr4	186574423	186574423	+	7.12874204111813e-13	5.15692766675465e-10	30.3337657742658
1182	chr14	104630710	104630710	+	4.903855099769319e-13	3.65114905996671e-10	30.3481323444749
2472	chr3	8928604	8928604	+	1.38888900380607e-13	1.12020350497876e-10	30.3499469777306
2244	chr20	60858916	60858916	+	5.87307980026708e-14	5.0176688061458695e-11	30.3688222276863
2482	chr3	12875442	12875442	+	1.1165283142489102e-09	4.66000561368549e-07	30.4201680672269
2388	chr22	25205100	25205100	+	4.0412118096355704e-14	3.54153762835055e-11	30.4284593009834
881	chr12	102327169	102327169	+	9.18989395692904e-09	3.16998859067987e-06	30.4361426400929
3338	chr7	2257611	2257611	+	2.2204460492503099e-16	2.6476607245991e-13	30.4634539058734
3434	chr7	70765656	70765656	+	3.77762282566252e-08	1.12108449207241e-05	30.4863780712017
3768	chr9	109893121	109893121	+	4.0202285944701495e-12	2.57751842562682e-09	30.4951237809452
2037	chr2	127814780	127814780	+	9.43689570931383e-15	9.09245226447361e-12	30.5179243898861
1985	chr2	71827385	71827385	+	6.61937171742011e-12	4.09931812941698e-09	30.5244169565778
3384	chr7	27217358	27217358	+	4.1078251911130805e-14	3.5913101056490796e-11	30.5330565961324
750	chr11	102493268	102493268	+	3.1587521487352903e-10	1.46411917043838e-07	30.5438842203548
2089	chr2	218157055	218157055	+	1.11022302462516e-16	1.37132955216678e-13	30.5566842746851
3623	chr8	40984060	40984060	+	3.25612559137767e-09	1.23883938048086e-06	30.5574385983209
2807	chr5	1382036	1382036	+	7.5353521977739e-08	2.07349773779464e-05	30.5650609809599
2349	chr22	19776018	19776018	+	7.82707232360735e-12	4.7874565110860905e-09	30.5946640951462
2060	chr2	155652357	155652357	+	3.8857805861880504e-14	3.41452822276001e-11	30.628857864866
3105	chr6	35575486	35575486	+	1.02941988266991e-10	5.2132875582837e-08	30.6317574140471
411	chr10	14520327	14520327	+	7.105427357600999e-14	6.00564706474056e-11	30.639316885654
2963	chr5	167797440	167797440	+	3.78119757726836e-12	2.43386567382209e-09	30.6489719074163
224	chr1	173065003	173065003	+	2.2204460492503099e-16	2.6476607245991e-13	30.6508125838676
3740	chr9	37421108	37421108	+	4.67940131088085e-11	2.51888018731323e-08	30.6546240543462
2282	chr21	43529162	43529162	+	2.93802796758058e-07	6.79023152981331e-05	30.6953709318779
2190	chr20	25561645	25561645	+	1.17905685215192e-13	9.599604482599469e-11	30.6975744330192
2192	chr20	31466534	31466534	+	1.47659662275146e-14	1.3870767297208698e-11	30.7029083990215
220	chr1	163235970	163235970	+	9.36512645210996e-10	3.97004614418104e-07	30.7315580042853
44	chr1	9343799	9343799	+	3.88578058618805e-15	3.95904560647314e-12	30.7435897435897
2114	chr2	238939370	238939370	+	3.5184621882677902e-09	1.32825174104828e-06	30.75371741617
2563	chr3	128199661	128199661	+	9.32587340685131e-15	8.99733252762876e-12	30.7566462167689
3081	chr6	32810442	32810442	+	6.66133814775094e-16	7.50561349807416e-13	30.7672203018295
19	chr1	3024705	3024705	+	4.25104396128972e-13	3.20350105745022e-10	30.7733152093112
1726	chr18	75054789	75054789	+	1.43662859386495e-13	1.1558404024068001e-10	30.8221534227726
70	chr1	19258538	19258538	+	4.36728431196798e-12	2.7829554380706e-09	30.8336969168121
3430	chr7	63226451	63226451	+	5.6621374255883e-15	5.62589694951572e-12	30.8477237048666
233	chr1	181289863	181289863	+	5.61898416684414e-10	2.48668989484444e-07	30.8519740862975
426	chr10	30980037	30980037	+	5.55111512312578e-15	5.52308689065471e-12	30.8534149347614
2600	chr3	191781573	191781573	+	4.1999737021569697e-13	3.1666465703327403e-10	30.9027482344933
1980	chr2	67569831	67569831	+	6.94999613415348e-14	5.87936830843024e-11	30.9032983508246
553	chr10	133933718	133933718	+	8.08708655597457e-12	4.934118585676211e-09	30.9141355140187
1554	chr17	19967280	19967280	+	5.41414679644525e-06	0.0007938769593901	30.952380952381
1024	chr13	111010267	111010267	+	1.11022302462516e-16	1.37132955216678e-13	30.956667095281
471	chr10	81146728	81146728	+	2.40252262528884e-13	1.87620573537652e-10	30.9571563875425
1898	chr2	1681387	1681387	+	9.76996261670138e-15	9.404072842082649e-12	31.0048691146252
846	chr12	26869233	26869233	+	4.62629934361303e-13	3.4613266038735005e-10	31.0072317900544
1014	chr13	98952600	98952600	+	5.1847415249994804e-14	4.46215712982884e-11	31.0221860565302
160	chr1	101003688	101003688	+	1.88737914186277e-15	2.01634008960981e-12	31.0234090323531
45	chr1	10221847	10221847	+	2.37587727269783e-14	2.16376426313036e-11	31.036376800739
2020	chr2	107084011	107084011	+	1.11022302462516e-16	1.37132955216678e-13	31.0386473429952
821	chr12	4793463	4793463	+	5.1181281435219704e-14	4.4087175327857195e-11	31.0511363636364
3619	chr8	30352258	30352258	+	7.36108951571168e-10	3.18210313215238e-07	31.0625068179339
2945	chr5	149533964	149533964	+	4.44089209850063e-16	5.12208073958707e-13	31.0745561885462
1578	chr17	48208274	48208274	+	1.73429270944325e-10	8.44674027582426e-08	31.0760896330953
2074	chr2	187263960	187263960	+	3.10016985416439e-08	9.40448238623769e-06	31.0802139037433
3842	chrX	145077317	145077317	+	9.9031893796564e-14	8.165179770363829e-11	31.0843217318037
2498	chr3	19992431	19992431	+	8.06389901630844e-07	0.0001614960133123	31.0886003709516
603	chr11	774568	774568	+	6.94019397506906e-10	3.01828174125913e-07	31.1062431544359
3556	chr8	1147133	1147133	+	1.83686399424232e-12	1.24535231201992e-09	31.122641509434
2550	chr3	125490507	125490507	+	2.9259927813995997e-12	1.91798731480477e-09	31.1570782159017
3582	chr8	5909870	5909870	+	2.3314683517128303e-15	2.45051271159285e-12	31.1675023022613
1556	chr17	30613032	30613032	+	2.8085866965454898e-11	1.56929777881366e-08	31.1731195805606
1701	chr18	44333132	44333132	+	2.54241072639161e-14	2.3046705495044298e-11	31.196349507545
3173	chr6	155503115	155503115	+	2.38348230041652e-11	1.35110965390257e-08	31.2127529123237
3749	chr9	85948302	85948302	+	6.961098364399729e-13	5.04688349255476e-10	31.2229437229437
1318	chr16	3197623	3197623	+	1.11022302462516e-16	1.37132955216678e-13	31.2259867272092
1360	chr16	29272117	29272117	+	1.96986871259242e-12	1.3284472016193e-09	31.2336153202566
463	chr10	73434098	73434098	+	2.6740164527083704e-09	1.0345861036159e-06	31.2458471760797
2938	chr5	139094171	139094171	+	1.3437873036537e-10	6.67706563348814e-08	31.2587412587413
2518	chr3	43119790	43119790	+	1.40998324127395e-14	1.3279122080899699e-11	31.2867305907826
1857	chr19	51364380	51364380	+	5.44009282066327e-15	5.41815199949189e-12	31.3077972611047
1425	chr16	86702431	86702431	+	4.662936703425661e-15	4.69527005442155e-12	31.3273436175623
101	chr1	28765093	28765093	+	1.2792772396963402e-09	5.2834972374383e-07	31.3431786216596
3724	chr8	145737513	145737513	+	4.21884749357559e-15	4.27457856458302e-12	31.3638550185096
3784	chr9	130550044	130550044	+	7.7715611723761e-15	7.58278024794321e-12	31.3694687612424
2632	chr4	1559487	1559487	+	1.8984813721090202e-14	1.7513374219836397e-11	31.3742787659148
2139	chr2	241098859	241098859	+	8.77076189453874e-14	7.305599118063329e-11	31.3796480016492
3166	chr6	145030284	145030284	+	6.47446409818286e-07	0.0001341827087784	31.3841496973033
3693	chr8	143193145	143193145	+	2.88657986402541e-14	2.5925620760024697e-11	31.3989071038251
3499	chr7	150690079	150690079	+	8.326672684688671e-15	8.081292808664419e-12	31.4245891166734
706	chr11	64205020	64205020	+	3.4217850775064594e-11	1.88811206316684e-08	31.4257228315055
154	chr1	93306316	93306316	+	1.50614706484475e-07	3.80358423692953e-05	31.4308176100629
1202	chr15	20557668	20557668	+	2.0206059048177802e-14	1.85872275087433e-11	31.4561027837259
1664	chr17	80627638	80627638	+	3.33066907387547e-16	3.90153688040404e-13	31.4601314789142
2362	chr22	20946456	20946456	+	2.2204460492503099e-16	2.6476607245991e-13	31.5141046684735
1557	chr17	30817450	30817450	+	2.2204460492503103e-15	2.3481602523188297e-12	31.527253541134
3751	chr9	90806124	90806124	+	8.70759020443757e-12	5.2851524219684e-09	31.5384615384615
3089	chr6	33053728	33053728	+	1.11022302462516e-16	1.37132955216678e-13	31.5466580561834
3464	chr7	101839486	101839486	+	1.11022302462516e-16	1.37132955216678e-13	31.6004363924888
2608	chr3	195750741	195750741	+	3.8635761256955403e-14	3.39807796441514e-11	31.6239316239316
3080	chr6	32807446	32807446	+	1.72439840184779e-12	1.17509299584254e-09	31.6435539788761
1823	chr19	37266783	37266783	+	1.11022302462516e-16	1.37132955216678e-13	31.6462176131578
495	chr10	110063093	110063093	+	2.2204460492503099e-16	2.6476607245991e-13	31.6623914454368
1903	chr2	1845157	1845157	+	6.65805077737502e-10	2.90869795668558e-07	31.6863956081661
1275	chr15	90174789	90174789	+	6.43929354282591e-15	6.354921521983799e-12	31.6871555743959
149	chr1	76501131	76501131	+	1.3180761837539e-07	3.38799134227172e-05	31.7096959265634
1769	chr19	3253512	3253512	+	1.04732889028014e-11	6.271008806145981e-09	31.719019109325
1376	chr16	57822522	57822522	+	9.338829709548689e-11	4.76907882172828e-08	31.7425083240843
2017	chr2	106722250	106722250	+	1.11022302462516e-16	1.37132955216678e-13	31.7440433582166
1855	chr19	51141603	51141603	+	8.06977955569721e-08	2.20205660533727e-05	31.8063872255489
346	chr10	1226705	1226705	+	9.992007221626409e-16	1.1004184185829099e-12	31.8181818181818
2857	chr5	14354826	14354826	+	2.3314683517128303e-15	2.45051271159285e-12	31.8502400960384
1880	chr19	58563099	58563099	+	2.2204460492503099e-16	2.6476607245991e-13	31.8672594474436
1392	chr16	78356714	78356714	+	7.7937656328686e-14	6.54396888314587e-11	31.8990868286643
2426	chr22	44557169	44557169	+	8.17337308944843e-11	4.21139639441681e-08	31.9048762911362
1477	chr16	89590242	89590242	+	1.20203813569475e-09	4.98560531030526e-07	31.92901904821
776	chr11	126084833	126084833	+	2.61747079566277e-09	1.01552818833731e-06	31.9348284166165
3660	chr8	124693444	124693444	+	1.11022302462516e-16	1.37132955216678e-13	31.9521178637201
3471	chr7	123235158	123235158	+	2.2204460492503099e-16	2.6476607245991e-13	31.9553915814188
2590	chr3	177920207	177920207	+	1.07457656106646e-08	3.64269322323599e-06	31.9789915966387
939	chr12	131294501	131294501	+	4.8979709177388e-12	3.09952428039834e-09	32.010582010582
3701	chr8	144154878	144154878	+	3.6859404417555203e-14	3.2555438074723495e-11	32.0292432325627
720	chr11	69580618	69580618	+	1.13686837721616e-13	9.284532576335729e-11	32.067921263249
2974	chr5	177651055	177651055	+	9.637912690152459e-11	4.90810711370221e-08	32.0703933747412
926	chr12	125632995	125632995	+	1.91557880668825e-11	1.10079967990023e-08	32.0722850869786
2596	chr3	187942150	187942150	+	2.31709353037957e-07	5.529862570581e-05	32.0833333333333
2397	chr22	31889843	31889843	+	2.21535456645938e-10	1.05836097518699e-07	32.0928402832415
2996	chr6	2798618	2798618	+	2.3314683517128303e-15	2.45051271159285e-12	32.0934547908232
409	chr10	13972276	13972276	+	4.55191440096314e-15	4.59137773431255e-12	32.1942446043165
241	chr1	184838335	184838335	+	2.6541802089497005e-10	1.24823704052601e-07	32.1984551396316
1253	chr15	74229790	74229790	+	1.11022302462516e-16	1.37132955216678e-13	32.2099181511796
3074	chr6	32605271	32605271	+	8.326672684688671e-15	8.081292808664419e-12	32.22109016811
3009	chr6	7393452	7393452	+	7.12704982808177e-08	1.97339333288448e-05	32.2257326506155
1997	chr2	99004172	99004172	+	4.30766533554561e-14	3.7503353975728696e-11	32.2260089686099
1487	chr17	65618	65618	+	7.39408534400354e-14	6.231626400487739e-11	32.2283796837663
3763	chr9	100127330	100127330	+	8.437694987151191e-15	8.183614779261369e-12	32.2286409242931
1525	chr17	4019965	4019965	+	4.55191440096314e-15	4.59137773431255e-12	32.22914884081
3015	chr6	17418407	17418407	+	5.833111771380569e-13	4.29479543930357e-10	32.2470215398173
671	chr11	14114745	14114745	+	8.48300985012429e-10	3.62690881064253e-07	32.2709045878052
3737	chr9	36154748	36154748	+	3.80440123848302e-12	2.44772444131817e-09	32.2844849930019
2194	chr20	31477981	31477981	+	1.64723790163634e-12	1.1267101646485702e-09	32.3420526635961
6	chr1	1063240	1063240	+	1.04913855381028e-11	6.2779904938432404e-09	32.3568521577951
759	chr11	117299038	117299038	+	1.12305662547385e-08	3.7929740964989e-06	32.3740188829485
380	chr10	3600583	3600583	+	4.7707593431312e-10	2.14076982888142e-07	32.408640571707
2104	chr2	236242265	236242265	+	3.8795633372501494e-12	2.4938898012785502e-09	32.435129740519
2638	chr4	1677792	1677792	+	1.4691875493966201e-09	5.97839514537888e-07	32.4411764705882
1209	chr15	27035050	27035050	+	1.69780109804396e-06	0.0003031314667834	32.495894909688
1765	chr19	2136703	2136703	+	2.44840803853563e-07	5.79551085379092e-05	32.5114453891432
2141	chr2	241350603	241350603	+	2.29816166097407e-13	1.79950949901044e-10	32.5117672229354
1625	chr17	77104792	77104792	+	6.66133814775094e-16	7.50561349807416e-13	32.5211218534971
3274	chr7	884056	884056	+	4.44089209850063e-16	5.12208073958707e-13	32.5270908585718
3189	chr6	167173307	167173307	+	3.21967452698857e-10	1.49046865580347e-07	32.5308771195311
1518	chr17	1894550	1894550	+	2.6064927993729696e-11	1.46785803052513e-08	32.5436640654032
766	chr11	120853259	120853259	+	1.74638081773537e-13	1.38901146572104e-10	32.5688073394495
2769	chr4	183776510	183776510	+	7.86637421867908e-12	4.80948500015407e-09	32.5734593048453
900	chr12	117486478	117486478	+	1.0325074129014e-14	9.9123101359819e-12	32.6096102413078
1767	chr19	2982834	2982834	+	8.21565038222616e-15	7.97883499741617e-12	32.6208119576921
3526	chr7	157636744	157636744	+	1.5896728378095297e-11	9.253276390393151e-09	32.6269739650021
2073	chr2	182212759	182212759	+	6.73825729147204e-06	0.0009481105730252	32.6355140186916
1428	chr16	87328927	87328927	+	3.5984313306869403e-09	1.35463164815005e-06	32.6574437332232
652	chr11	7556057	7556057	+	1.15907283770866e-13	9.452680089974229e-11	32.6924863007337
1224	chr15	42127442	42127442	+	2.76001443921814e-13	2.1382625779138401e-10	32.7023988005997
1826	chr19	39387715	39387715	+	1.0233736080778e-10	5.18625777880266e-08	32.7818315515583
416	chr10	18282426	18282426	+	2.99316127438942e-12	1.9589444186285e-09	32.7828054298643
828	chr12	8003757	8003757	+	9.803269307440131e-14	8.09419916230354e-11	32.7865419516962
491	chr10	105001796	105001796	+	1.77635683940025e-15	1.90398810788753e-12	32.7964676198486
1705	chr18	55250669	55250669	+	1.99840144432528e-15	2.1310581182031996e-12	32.8448739333618
1710	chr18	60051941	60051941	+	1.7874590696464998e-14	1.66043629575358e-11	32.8566384180791
3467	chr7	103849116	103849116	+	7.60502771868232e-14	6.396509343839959e-11	32.8958382689726
1849	chr19	48345330	48345330	+	5.36372268822305e-09	1.94269836239767e-06	32.9378068739771
263	chr1	208410848	208410848	+	2.66986333041785e-09	1.03338915880837e-06	32.938262195122
1998	chr2	99221939	99221939	+	7.771561172376101e-16	8.70959707528981e-13	32.9800101858925
3004	chr6	3440026	3440026	+	6.66133814775094e-16	7.50561349807416e-13	32.9814921920185
227	chr1	178659932	178659932	+	4.44089209850063e-16	5.12208073958707e-13	33.0080077269511
3130	chr6	88723346	88723346	+	1.11022302462516e-16	1.37132955216678e-13	33.009828009828
418	chr10	27539507	27539507	+	1.5543122344752201e-15	1.68200872511699e-12	33.0234301780694
2218	chr20	55703713	55703713	+	1.1284381207232702e-09	4.70300501704332e-07	33.058432425521
1818	chr19	34245941	34245941	+	2.7744473385382697e-13	2.14773825211605e-10	33.0806524507991
31	chr1	4121716	4121716	+	3.7525538232330304e-14	3.3083872903588096e-11	33.099671803653
3764	chr9	101172975	101172975	+	3.66849750577103e-08	1.0922441979559e-05	33.1046312178388
73	chr1	20251222	20251222	+	3.5527136788005e-15	3.63234628548774e-12	33.11547756646
1812	chr19	19168729	19168729	+	1.11022302462516e-16	1.37132955216678e-13	33.1546623227965
798	chr12	297774	297774	+	2.24265050974282e-14	2.0500884137294197e-11	33.1625344352617
3397	chr7	37286864	37286864	+	2.78860109448331e-08	8.56049791615347e-06	33.1651954602774
1015	chr13	99095031	99095031	+	1.5543122344752201e-15	1.68200872511699e-12	33.3379973542281
480	chr10	90580144	90580144	+	1.18671739102183e-12	8.28366827537911e-10	33.3482698531242
381	chr10	3612226	3612226	+	9.992007221626409e-16	1.1004184185829099e-12	33.35001668335
3585	chr8	6645024	6645024	+	1.09188214025835e-11	6.5111300596882905e-09	33.3592421666262
3744	chr9	71815084	71815084	+	1.98368544479521e-07	4.8354350914999e-05	33.3725836522422
1668	chr17	80771274	80771274	+	1.0144823869850901e-09	4.26573960343507e-07	33.3912288319583
447	chr10	52263731	52263731	+	8.826273045769991e-14	7.34138819988932e-11	33.4060846560847
2944	chr5	149533899	149533899	+	2.3710922114617e-11	1.3446071255604e-08	33.4492465640007
2474	chr3	9050659	9050659	+	3.44058115331336e-13	2.62451992138908e-10	33.4728867623604
2755	chr4	123664203	123664203	+	1.7680745756365497e-11	1.0208469581498e-08	33.4839246119734
2513	chr3	41458709	41458709	+	1.5143442055887099e-12	1.04189962924744e-09	33.5026455026455
3540	chr8	231937	231937	+	2.4757973449141e-14	2.2498620345513398e-11	33.5138220412193
525	chr10	130511365	130511365	+	4.88498130835069e-15	4.89694783143735e-12	33.5423197492163
2097	chr2	220424486	220424486	+	4.2721381987576e-13	3.21691186838697e-10	33.5960960960961
3425	chr7	55413147	55413147	+	1.3014367361563498e-11	7.67782220842436e-09	33.6080586080586
113	chr1	38180356	38180356	+	2.7407931479928e-10	1.28484033402391e-07	33.6161468862891
2966	chr5	172681629	172681629	+	8.7208018584306e-13	6.21187417596099e-10	33.6735572782084
3010	chr6	8507002	8507002	+	1.6764367671839902e-14	1.5612687335186097e-11	33.6744477633957
736	chr11	72581110	72581110	+	1.11022302462516e-16	1.37132955216678e-13	33.7034412158438
963	chr12	133788514	133788514	+	1.47532097649616e-10	7.27872412762567e-08	33.707729468599
2197	chr20	31720906	31720906	+	6.71030009335993e-10	2.92759032031443e-07	33.7104546406872
2746	chr4	108125582	108125582	+	2.52020626589911e-14	2.2852503686453798e-11	33.7352245862884
2297	chr21	44799734	44799734	+	2.55351295663786e-15	2.67333213985371e-12	33.8320463320463
3796	chr9	135091341	135091341	+	1.11022302462516e-16	1.37132955216678e-13	33.8484546360917
1621	chr17	76153388	76153388	+	4.44089209850063e-16	5.12208073958707e-13	33.876468359227
1850	chr19	49106994	49106994	+	4.21884749357559e-15	4.27457856458302e-12	33.880698186748
107	chr1	37981202	37981202	+	1.11022302462516e-16	1.37132955216678e-13	33.8954703832753
3119	chr6	46555400	46555400	+	4.89130957959105e-12	3.0959784110550305e-09	33.9295943342186
3133	chr6	90322507	90322507	+	4.44089209850063e-16	5.12208073958707e-13	33.9582185852545
1533	chr17	12915008	12915008	+	1.11022302462516e-16	1.37132955216678e-13	33.9594438333756
3151	chr6	132655724	132655724	+	1.05647712800305e-10	5.34199261165783e-08	33.9750206440958
1385	chr16	71407197	71407197	+	5.21804821573824e-14	4.4881818438243895e-11	33.9991463935126
3242	chr7	57137	57137	+	2.77555756156289e-15	2.8861760030944397e-12	34.0329192926635
2348	chr22	19735859	19735859	+	6.71084299241897e-11	3.51286885200834e-08	34.0792130805811
3472	chr7	127851796	127851796	+	8.74855743404623e-14	7.28917884612039e-11	34.0972415714684
596	chr11	361130	361130	+	3.33066907387547e-16	3.90153688040404e-13	34.1240036787247
3755	chr9	94939076	94939076	+	1.765254609154e-14	1.64033049775869e-11	34.1546304163127
2733	chr4	86166611	86166611	+	3.32868288488442e-10	1.53534477289561e-07	34.1549295774648
1260	chr15	78466597	78466597	+	1.5543122344752201e-15	1.68200872511699e-12	34.2064344679407
2601	chr3	191956118	191956118	+	7.02882196890187e-13	5.09093842529829e-10	34.2762353762878
[truncated: 125 more rows]
